# Supplementary material for: Capillary whole-blood IgG-IgM COVID-19 self-test as a serological screening tool for SARS-CoV-2 infection adapted to the general public
Source: PubMed Central journal article supplement (PMC7561138; doi:10.1371/journal.pone.0240779), 2020-10-15

# PLOS ONE

## Capillary whole-blood IgG-IgM COVID-19 self-test as a serological screening tool for SARS-CoV-2 infection adapted to the general public --Manuscript Draft--

|                                                                                                                                                                                                                                                                                                                                                                              |                                                                                                                                                                                                                                                                                                                                                                                                                                                                                                                                                                                                                                                                                                                                                                                                                                                                                                                                                                                                                                                                                                                                                                                                                                                                                                                                                                                                                                                                                                                                  |
|------------------------------------------------------------------------------------------------------------------------------------------------------------------------------------------------------------------------------------------------------------------------------------------------------------------------------------------------------------------------------|----------------------------------------------------------------------------------------------------------------------------------------------------------------------------------------------------------------------------------------------------------------------------------------------------------------------------------------------------------------------------------------------------------------------------------------------------------------------------------------------------------------------------------------------------------------------------------------------------------------------------------------------------------------------------------------------------------------------------------------------------------------------------------------------------------------------------------------------------------------------------------------------------------------------------------------------------------------------------------------------------------------------------------------------------------------------------------------------------------------------------------------------------------------------------------------------------------------------------------------------------------------------------------------------------------------------------------------------------------------------------------------------------------------------------------------------------------------------------------------------------------------------------------|
| <b>Manuscript Number:</b>                                                                                                                                                                                                                                                                                                                                                    | PONE-D-20-20619                                                                                                                                                                                                                                                                                                                                                                                                                                                                                                                                                                                                                                                                                                                                                                                                                                                                                                                                                                                                                                                                                                                                                                                                                                                                                                                                                                                                                                                                                                                  |
| <b>Article Type:</b>                                                                                                                                                                                                                                                                                                                                                         | Research Article                                                                                                                                                                                                                                                                                                                                                                                                                                                                                                                                                                                                                                                                                                                                                                                                                                                                                                                                                                                                                                                                                                                                                                                                                                                                                                                                                                                                                                                                                                                 |
| <b>Full Title:</b>                                                                                                                                                                                                                                                                                                                                                           | Capillary whole-blood IgG-IgM COVID-19 self-test as a serological screening tool for SARS-CoV-2 infection adapted to the general public                                                                                                                                                                                                                                                                                                                                                                                                                                                                                                                                                                                                                                                                                                                                                                                                                                                                                                                                                                                                                                                                                                                                                                                                                                                                                                                                                                                          |
| <b>Short Title:</b>                                                                                                                                                                                                                                                                                                                                                          | Practicability of COVID-19 self-test                                                                                                                                                                                                                                                                                                                                                                                                                                                                                                                                                                                                                                                                                                                                                                                                                                                                                                                                                                                                                                                                                                                                                                                                                                                                                                                                                                                                                                                                                             |
| <b>Corresponding Author:</b>                                                                                                                                                                                                                                                                                                                                                 | Laurent Bélec, Ph.D., M.D.<br>Hopital Europeen Georges Pompidou<br>FRANCE                                                                                                                                                                                                                                                                                                                                                                                                                                                                                                                                                                                                                                                                                                                                                                                                                                                                                                                                                                                                                                                                                                                                                                                                                                                                                                                                                                                                                                                        |
| <b>Keywords:</b>                                                                                                                                                                                                                                                                                                                                                             | SARS-CoV-2; COVID-19, Serology; IgG; IgM; Rapid diagnostic test; Self-testing; Practicability; France                                                                                                                                                                                                                                                                                                                                                                                                                                                                                                                                                                                                                                                                                                                                                                                                                                                                                                                                                                                                                                                                                                                                                                                                                                                                                                                                                                                                                            |
| <b>Abstract:</b>                                                                                                                                                                                                                                                                                                                                                             | The practicability of a prototype capillary whole-blood IgG-IgM COVID-19 self-test (Exacto® COVID-19 self-test, Biosynex Swiss SA, Freiburg, Switzerland) as a serological screening tool for SARS-CoV-2 infection adapted to the general public was evaluated in a cross-sectional, general adult population study performed between April and May 2020 in Strasbourg, France, consisting of face-to-face, paper-based, semi-structured, and self-administrated questionnaires. A total of 167 participants (52.7% female; median age, 35.8 years; 82% with post-graduate level) were enrolled, including 83 and 84 for usability and test results interpretation substudies, respectively. All participants (100%; 95% CI: 95.6–100) correctly used the self-test. However, 12 (14.5%; 95% CI: 8.5–23.6) asked for verbal help. Overall, 98.5% (95% CI: 96.5–99.4) test results were correctly interpreted, while misinterpretation occurred in only 2.3% of positive and 1.2% of invalid test results. Finally, all (100%) participants found that performing the COVID-19 self-test was easy; and 98.8% found the interpretation of the self-test results easy. Taken together, these pilot observations demonstrated for the first-time, high practicability and satisfaction of COVID-19 self-testing for serological IgG and IgM immune status, indicating its potential for use by the general public to complete the arsenal of available SARS-CoV-2 serological assays in the urgent context of the COVID-19 epidemic. |
| <b>Order of Authors:</b>                                                                                                                                                                                                                                                                                                                                                     | Serge Tonen-Wolyec<br>Raphael Dupont<br>Salomon Batina-Agasa<br>Marie Pierre Hayette<br>Laurent Bélec                                                                                                                                                                                                                                                                                                                                                                                                                                                                                                                                                                                                                                                                                                                                                                                                                                                                                                                                                                                                                                                                                                                                                                                                                                                                                                                                                                                                                            |
| <b>Additional Information:</b>                                                                                                                                                                                                                                                                                                                                               |                                                                                                                                                                                                                                                                                                                                                                                                                                                                                                                                                                                                                                                                                                                                                                                                                                                                                                                                                                                                                                                                                                                                                                                                                                                                                                                                                                                                                                                                                                                                  |
| <b>Question</b>                                                                                                                                                                                                                                                                                                                                                              | <b>Response</b>                                                                                                                                                                                                                                                                                                                                                                                                                                                                                                                                                                                                                                                                                                                                                                                                                                                                                                                                                                                                                                                                                                                                                                                                                                                                                                                                                                                                                                                                                                                  |
| <b>Financial Disclosure</b><br><br>Enter a financial disclosure statement that describes the sources of funding for the work included in this submission. Review the <a href="#">submission guidelines</a> for detailed requirements. View published research articles from <a href="#">PLOS ONE</a> for specific examples.<br><br>This statement is required for submission | The authors received no specific funding for this work.                                                                                                                                                                                                                                                                                                                                                                                                                                                                                                                                                                                                                                                                                                                                                                                                                                                                                                                                                                                                                                                                                                                                                                                                                                                                                                                                                                                                                                                                          |

and **will appear in the published article** if the submission is accepted. Please make sure it is accurate.

#### Unfunded studies

Enter: *The author(s) received no specific funding for this work.*

#### Funded studies

Enter a statement with the following details:

- Initials of the authors who received each award
- Grant numbers awarded to each author
- The full name of each funder
- URL of each funder website
- Did the sponsors or funders play any role in the study design, data collection and analysis, decision to publish, or preparation of the manuscript?
- **NO** - Include this sentence at the end of your statement: *The funders had no role in study design, data collection and analysis, decision to publish, or preparation of the manuscript.*
- **YES** - Specify the role(s) played.

\* typeset

#### Competing Interests

Use the instructions below to enter a competing interest statement for this submission. On behalf of all authors, disclose any [competing interests](#) that could be perceived to bias this work—acknowledging all financial support and any other relevant financial or non-financial competing interests.

This statement **will appear in the published article** if the submission is accepted. Please make sure it is accurate. View published research articles from [PLOS ONE](#) for specific examples.

The authors have declared that no competing interests exist.

**NO authors have competing interests**

Enter: *The authors have declared that no competing interests exist.*

**Authors with competing interests**

Enter competing interest details beginning with this statement:

*I have read the journal's policy and the authors of this manuscript have the following competing interests: [insert competing interests here]*

\* typeset

**Ethics Statement**

Enter an ethics statement for this submission. This statement is required if the study involved:

- Human participants
- Human specimens or tissue
- Vertebrate animals or cephalopods
- Vertebrate embryos or tissues
- Field research

Write "N/A" if the submission does not require an ethics statement.

General guidance is provided below. Consult the [submission guidelines](#) for detailed instructions. **Make sure that all information entered here is included in the Methods section of the manuscript.**

The study was conducted according to the ethical requirements established by the Declaration of Helsinki. . Ethical approval for this study was obtained from the local scientific committee of Parc de l'Innovation, Strasbourg, France. All participants signed an informed consent form, and were informed of their self-test results, and were referred to care facilities in the event of a positive test.

**Format for specific study types**

**Human Subject Research (involving human participants and/or tissue)**

- Give the name of the institutional review board or ethics committee that approved the study
- Include the approval number and/or a statement indicating approval of this research
- Indicate the form of consent obtained (written/oral) or the reason that consent was not obtained (e.g. the data were analyzed anonymously)

**Animal Research (involving vertebrate animals, embryos or tissues)**

- Provide the name of the Institutional Animal Care and Use Committee (IACUC) or other relevant ethics board that reviewed the study protocol, and indicate whether they approved this research or granted a formal waiver of ethical approval
- Include an approval number if one was obtained
- If the study involved *non-human primates*, add *additional details* about animal welfare and steps taken to ameliorate suffering
- If anesthesia, euthanasia, or any kind of animal sacrifice is part of the study, include briefly which substances and/or methods were applied

**Field Research**

Include the following details if this study involves the collection of plant, animal, or other materials from a natural setting:

- Field permit number
- Name of the institution or relevant body that granted permission

**Data Availability**

Authors are required to make all data underlying the findings described fully available, without restriction, and from the time of publication. PLOS allows rare exceptions to address legal and ethical concerns. See the [PLOS Data Policy](#) and [FAQ](#) for detailed information.

Yes - all data are fully available without restriction

A Data Availability Statement describing where the data can be found is required at submission. Your answers to this question constitute the Data Availability Statement and **will be published in the article**, if accepted.

**Important:** Stating 'data available on request from the author' is not sufficient. If your data are only available upon request, select 'No' for the first question and explain your exceptional situation in the text box.

Do the authors confirm that all data underlying the findings described in their manuscript are fully available without restriction?

**Describe where the data may be found in full sentences. If you are copying our sample text, replace any instances of XXX with the appropriate details.**

- If the data are **held or will be held in a public repository**, include URLs, accession numbers or DOIs. If this information will only be available after acceptance, indicate this by ticking the box below. For example: *All XXX files are available from the XXX database (accession number(s) XXX, XXX).*
- If the data are all contained **within the manuscript and/or Supporting Information files**, enter the following: *All relevant data are within the manuscript and its Supporting Information files.*
- If neither of these applies but you are able to provide **details of access elsewhere**, with or without limitations, please do so. For example:

*Data cannot be shared publicly because of [XXX]. Data are available from the XXX Institutional Data Access / Ethics Committee (contact via XXX) for researchers who meet the criteria for access to confidential data.*

*The data underlying the results presented in the study are available from (include the name of the third party*

All relevant data are within the manuscript and its Supporting Information files.

*and contact information or URL).*

- This text is appropriate if the data are owned by a third party and authors do not have permission to share the data.

\* typeset

Additional data availability information:

1  
2  
3 **Capillary whole-blood IgG-IgM COVID-19 self-test**  
4 **as a serological screening tool for SARS-CoV-2 infection**  
5 **adapted to the general public**  
6  
7

8 **Serge Tonen-Wolyec<sup>1,2</sup>, Raphaël Dupont<sup>3</sup>, Salomon Batina-Agasa<sup>2</sup>,**  
9 **Marie-Pierre Hayette<sup>4</sup>, Laurent Bélec<sup>5,6,\*</sup>**  
10

11  
12 <sup>1</sup>Ecole Doctorale Régionale D’Afrique Centrale en Infectiologie Tropicale, Franceville, Gabon;

13  
14 <sup>2</sup>Faculty of Medicine and Pharmacy, University of Kisangani, Kisangani, the Democratic Republic of the  
15 Congo;

16  
17 <sup>3</sup>BioSynex, Strasbourg, France;

18  
19 <sup>4</sup>Department of Clinical Microbiology, University Hospital of Liège, Liege, Belgium;

20  
21 <sup>5</sup>Laboratoire de Virologie, Hôpital Européen Georges Pompidou, Assistance Publique-Hôpitaux de Paris,  
22 Paris, France;

23  
24 <sup>6</sup>Université Paris Descartes, Sorbonne Paris Cité, Paris, France.  
25

26  
27  
28 **\*Corresponding author:** [laurent.belec@aphp.fr](mailto:laurent.belec@aphp.fr) (LB)  
29

30  
31  
32 **Author’s contribution.** STW, RD and LB conceived the study. RD performed the experiments,  
33 and collected data. STW analyzed the data and generated the figs. STW, MPH, SBA and LB  
34 supervised this study. All authors wrote and edited the manuscript.  
35

## 36 Abstract

37

38 The practicability of a prototype capillary whole-blood IgG-IgM COVID-19 self-test (Exacto<sup>®</sup>  
39 COVID-19 self-test, Biosynex Swiss SA, Freiburg, Switzerland) as a serological screening tool  
40 for SARS-CoV-2 infection adapted to the general public was evaluated in a cross-sectional,  
41 general adult population study performed between April and May 2020 in Strasbourg, France,  
42 consisting of face-to-face, paper-based, semi-structured, and self-administrated questionnaires.  
43 A total of 167 participants (52.7% female; median age, 35.8 years; 82% with post-graduate  
44 level) were enrolled, including 83 and 84 for usability and test results interpretation substudies,  
45 respectively. All participants (100%; 95% CI: 95.6–100) correctly used the self-test. However,  
46 12 (14.5%; 95% CI: 8.5–23.6) asked for verbal help. Overall, 98.5% (95% CI: 96.5–99.4) test  
47 results were correctly interpreted, while misinterpretation occurred in only 2.3% of positive and  
48 1.2% of invalid test results. Finally, all (100%) participants found that performing the COVID-  
49 19 self-test was easy; and 98.8% found the interpretation of the self-test results easy. Taken  
50 together, these pilot observations demonstrated for the first-time, high practicability and  
51 satisfaction of COVID-19 self-testing for serological IgG and IgM immune status, indicating  
52 its potential for use by the general public to complete the arsenal of available SARS-CoV-2  
53 serological assays in the urgent context of the COVID-19 epidemic.

54

## 55 Introduction

56

57 Severe acute respiratory syndrome coronavirus 2 (SARS-CoV-2), a novel coronavirus  
58 that causes Coronavirus Disease 2019 (COVID-19), started in the Wuhan province, China, in  
59 December 2019, and was declared by the World Health Organization (WHO) as global



60 pandemic on March 11, 2020 [1-4]. Controlling the outbreak in the community and in hospitals  
61 mainly relied on the availability of highly sensitive and specific nucleic acid amplification-  
62 based molecular testing for SARS-CoV-2 [5,6]. Furthermore, it was demonstrated that  
63 serological testing looking for specific SARS-CoV-2 IgG and/or IgM may be useful for  
64 confirming the diagnosis and care of COVID-19 patients [7-9]. On March 2, 2020, the WHO  
65 recommended serological testing in addition of molecular diagnosis, for investigating on-going  
66 outbreaks as well as for the diagnosis of strongly suspected patients of SARS-CoV-2 infection  
67 with negative RT-PCR [10]. Furthermore, antibody tests for SARS-CoV-2 may constitute one  
68 of the keys to fight the SARS-CoV-2 epidemic, in particular to overcome the de-confinement  
69 period [9]. Seropositivity to SARS-CoV-2 antigens would also allow to identify previously  
70 infected individuals, including asymptomatic patients, *a priori* considered to be healed and  
71 protected against new reinfection [9].

72         Recently, rapid lateral flow assays for IgG and IgM antibodies produced during the  
73 COVID-19 epidemic have been developed [11]. Several reports have shown that COVID-19  
74 IgG/IgM lateral flow immunoassays may be a reliable tool to diagnose SARS-CoV-2 infection  
75 from 14 days of onset of symptoms [12,13]. In some countries, rapid diagnostic testing for  
76 COVID-19 has been incorporated into the local guidelines for testing asymptomatic contacts of  
77 positive cases, at day 14 of home surveillance [14]. These easy to use IgG-IgM combined tests  
78 allow rapid screening with capillary blood samples. The tests are simple, qualitative, visually  
79 interpretable, and give a result within 10 to 15 minutes. A positive serology allows to determine  
80 whether a person has already been infected by SARS-CoV-2. Serologic tests will be needed to  
81 assess the response to vaccine candidates and to map levels of immunity in communities. These  
82 rapid tests could be particularly interesting for developing countries for testing patients at the  
83 bedside or any other locations where laboratory facilities are lacking.

84 HIV self-testing constitutes a novel innovative approach to make testing more  
85 accessible, confidential, and available at non-traditional venues, such as pharmacies and  
86 community venues, as well as in the home, as it offers a discreet, convenient, and empowering  
87 way to test [15,16]. HIV self-testing has demonstrated high acceptability with very convenient  
88 usability in various adolescent and adult  populations from developed  as resources-  
89 constrained settings [17-21].

90 To our knowledge, there is no currently reported experience in the literature about self-  
91 testing for SRAS-CoV-2 infection. Based on our own experience of HIV self-testing evaluation,  
92 we herein aimed at evaluating the practicability of a prototype capillary whole-blood IgG-IgM  
93 COVID-19 self-test as a serological screening tool for SARS-CoV-2 infection adapted to the  
94 general public.

95

## 96 **Material and methods**

97

98 **Prototype SARS-CoV-2 test for self-testing.** The prototype capillary whole-  
99 blood IgG/IgM SARS-CoV-2 self-test (Exacto<sup>®</sup> COVID-19 self-test, Biosynex Swiss SA,  
100 Freiburg, Switzerland) was adapted from the CE IVD-labeled finger-stick whole-blood rapid  
101 diagnostic test for IgG and IgM antibodies against SARS-CoV-2 detection (BIOSYNEX<sup>®</sup>  
102 COVID-19 BSS [IgG/IgM], Biosynex Swiss SA), by re-packaging for individual use with the  
103 addition of seven components placed in a pouch containing the test cassette, diluent vial,  
104 pipette, alcohol wipe, compress, lancet and dressing. The Exacto<sup>®</sup> COVID-19 self-test  
105 (Biosynex Swiss SA) consists of visually read, qualitative, *in vitro* lateral flow immunoassays  
106 for the detection of IgG and IgM antibodies to SARS-CoV-2 in human whole blood, serum, or  
107 plasma as an aid in the diagnosis of SARS-COV-2 infection. The targeted protein is the  
108 receptor-binding domain (RBD) of the spike surface protein of SARS-CoV-2. During testing,

109 the specimen reacts with SARS-CoV-2 antigen-coated particles in the test cassette. The mixture  
110 then migrates upward on the membrane chromatographically by capillary action and reacts with  
111 the anti-human IgG in the IgG test line region or/and with the anti-human IgM in the IgM line  
112 region. The quantity of blood needed to perform the test is 10  $\mu$ L.

113 The analytical performances of the BIOSYNEX<sup>®</sup> COVID-19 BSS (IgG/IgM) (Biosynex  
114 Swiss SA) were evaluated during the COVID-19 epidemic in *Grand Hôpital de l'Est francilien*,  
115 Jossigny, France, using two serum sample panels obtained from patients with COVID-19  
116 confirmed by positive nucleic acid amplification-based diagnosis at least 14 days after  
117 symptoms onset and from patients randomly selected for whom serum samples were collected  
118 before the COVID-19 epidemic (from October 1 to November 30, 2019) (instructions for use  
119 2020). The BIOSYNEX<sup>®</sup> COVID-19 BSS (IgG/IgM) (Biosynex Swiss SA) showed **sensitivity**  
120 **of 97.4% and specificity of 100%**, demonstrating high analytical performances allowing  
121 convenient management of suspected on-going and past-infections. Furthermore, this rapid  
122 diagnostic test is recommended for both SARS-CoV-2-specific IgG and IgM detection by the  
123 French Ministry of Health [22], because the test fulfilled the criteria of the minimal analytical  
124 performances [*i.e.* minimum sensitivity of 90% (or even 95%) and minimum specificity of  
125 98%] of serological tests detecting the antibodies directed against SARS-CoV-2, defined on  
126 April 16, 2020 by the so-called *Haute Autorité de Santé* [23]. The simplified instructions for  
127 use of the Exacto<sup>®</sup> COVID-19 self-test (Biosynex Swiss SA) comprised an easy-to-read leaflet  
128 in French and English, in A3 format color printing. As an example, the instructions for use are  
129 depicted in Fig 1. The online instruction in the **video** for use was available online from  
130 Youtube [24].

131

132 **Fi**  Instructions for use of the Exacto<sup>®</sup> COVID-19 self-test (Biosynex Swiss SA) designed  
133 for the general public using typical pictures representative of the principal steps of the  
134 man  cturer's instructions with explanations written.

135

136 **Study design and recruitment of participants.** The practicability evaluation  
137 of the Exacto<sup>®</sup> COVID-19 self-test (Biosynex Swiss SA) is a cross-sectional study performed  
138 between April and May 2020 by home-based recruitment of adult volunteers using a door-to-  
139 door community approach, in 15 neigh  hoods of Strasbourg and its suburbs, France,  
140 consisting of face-to-face, paper-based, semi-structured, and self-administrated questionnaires.  
141 Strasbourg is the capital city of the Grand Est province, which was one of the regions affected  
142 the most by the SARS-CoV-2 epidemic in France [25].

143 All participants accepted voluntarily to be included. Eligible participants had an age  $\geq$   
144 18 years, wanted to know their SRAS-CoV-2 serology status, were capable to speak and read  
145 in French, and gave their consent to participate in the study. All trained individuals (physicians,  
146 nurses, and biologist) in rapid diagnostic tests were excluded. Informed written consent was  
147 signed by all participants. Ethical approval for this study was obtained from the local scientific  
148 committee of Parc de l'Innovation, Strasbourg, France.

149

150 **Practicability study outcomes.** The practicability evaluation was divided into four  
151 substudies carried out by trained health care professionals, based on previously acquired  
152 experience from WHO recommendations for evaluating the practicability of HIV self-tests  
153 [17,18,26]. As depicted in the Fig 2, all participants were included in substudy 1 concerning the  
154 understanding of labeling, while they were randomized into two groups for substudy 2  
155 concerning manipulation of the test and substudy 3 evaluating the interpretation of COVID-19

156 self-test results, using block randomization of 4. Participants in sub-study 4 were each drawn  
157 from the satisfaction questionnaires for substudies 2 and 3.

158

159 **Fig 2.** Flow chart showing the recruitment of study participants, their randomization, and  
160 affiliation for each substudy.

161

162 **Data collection and procedures.** Paper-based, self-administered, and structured  
163 questionnaires were used to obtain the data on the socio-demographic characteristics, medical  
164 history of study participants, participants' understanding of the instructions for use, and  
165 participants' opinions or levels of satisfaction about the practicability of the Exacto<sup>®</sup> COVID-  
166 19 self-test (Biosynex Swiss SA). All data related to the observation of manipulation and the  
167 interpretation of test results were recorded on the standardized sheets by the observers.

168 **Substudy 1. Comprehension of labeling.** After receiving a brief explanation of  
169 the objectives and conduct of the study, the participants were asked to sign the informed consent  
170 form. In a private setting, the participants had the choice between a paper-based instruction for  
171 use and a video-based instruction for use, which they were asked to read or watch and  
172 understand independently. After their self-declaration of having understood the instruction for  
173 use, the participants were asked to fill a questionnaire to gauge their comprehension. To this  
174 end, 10 questions restating the key information with closed answers (true, false, or don't know)  
175 were asked by the observer on the followings items: 1. Identification of each component of the  
176 kit; 2. Manipulation of blood sampling device; 3. Diluent deposit; 4. Possession of a timer; 5.  
177 Interpretation of a positive test result; 6. Interpretation of a negative test result; 7. Diagnosis of  
178 an invalid test result; 8. Reliability of self-test result; 9. Meaning of a positive result; and 10.  
179 Detection of the virus. The participants who correctly answered all 10 questions were  
180 considered to have correctly understood the instructions for use.

181 After this survey, participants were randomized in two groups for evaluation on  
 182 performing the self-test and the interpretation of test results. In order to achieve this, a sealed  
 183 randomization envelope was used sequentially. In each group, before starting the survey, a pre-  
 184 test satisfaction questionnaire was completed by the participants.

185 **Substudy 2. Observation of manipulation.** In a private setting supervised by  
 186 an observer, each participant received a box containing the Exacto® COVID-19 self-test  
 187 (Biosynex Swiss SA). Participants were then asked to carry out the self-test by themselves in  
 188 front of a trained observer. The observer was responsible for recording the respect or not of  
 189 each step,  for verbal assistance (mimicking telephone support), difficulty, and errors on  
 190 a standardized sheet. The successful performance of the SARS-CoV-2 self-test was conditioned  
 191 by the presence of the control band on test strip, and the test results were read and recorded  
 192 independently by both the participants and the observers.

193 **Substudy 3. Interpretation of test results.** In a private setting supervised by an  
 194 observer, eight standardized test results including four positive tests (one weak positive for  
 195 IgM, one clearly positive for IgM, one clearly positive for IgG but weak positive for IgM, and  
 196 one clearly positive for IgM and IgG), two negative tests, and two invalid tests were  used  
 197 to the participants for interpretation after  successive random selection of four tests (Fig 3).  
 198 These standardized tests were coded by numbers to determine the expected results.

199  
 200 **Fig 3.** Panel of 8 Exacto® COVID-19 self-test (Biosynex Swiss SA) cassettes, including 4  
 201 positive tests  2, n°3, n°6 and n°7), 2 negative tests (n°2 and n°7) and 2 invalid tests (n°1 and  
 202 n°5). The n°2 and n°7 are weakly positive for IgM. Each volunteer  successfully drew 4 tests  
 203 among a panel of 8 and interpreted them with the help of the reading and interpretation scale.  
 204 The observer noted the number of the drawn test and the result given by the participant.

205

206           **Substudy 4. Satisfaction questionnaire.** Finally, the participants fulfilled the  
207 satisfaction questionnaire concerning their experiences with the COVID-19 self-test including  
208 understanding of instructions for use, the identification of the different components of the kit,  
209 the sample collection and transfer, the overall performance of the self-test, the reading and  
210 interpretation of test results, and the ability to overcome the difficulties encountered.

211

212           **Statistical analysis.** All data were entered into an Excel file and analyzed on SPSS 20.0  
213 (Chicago, IL). Descriptive statistics were computed using mean (standard deviation) or median  
214 (interquartile range) for normal or skewed distribution, respectively, then, proportions of all  
215 categorical variables were calculated for qualitative data. The labeling index for understanding  
216 and usability index were defined as the mean of the correct answers for each question related  
217 to the understanding of instructions for use and performing of the COVID-19 self-test,  
218 respectively. The Wilson score bounds were used to estimate the 95% confidence intervals (CI).  
219 Cohen's  $\kappa$  coefficient estimated the concordance between the results read by participants in  
220 connection with the expected results [27]. The degree of agreement was determined as ranked  
221 by Landis and Koch [28]. The comparison of data from the post-test satisfaction questionnaire  
222 paired to those from the pre-test satisfaction questionnaire was performed by using Mac  
223 Nemar's chi-squared pairing test.

224

## 225           **Results**

226

227           **Study population.** A total of 194 individuals were assessed for eligibility, but 27 were  
228 excluded because they were trained (n=12), less than 18 years old (n=5),  not consenting  
229 (n=10). Finally, 167 were successfully enrolled in the study (substudies 1 and 4), and among

230 them, 83 were assigned after randomization in substudy 2 and 84 in substudy 3 (Fig 2). The  
 231 demographic characteristics and medical history of study participants are shown in Table 1.  
 232 Overall, 88 (52.7%) were female. The mean age was 38.6 (SD: 13.8) years, and around one half  
 233 of participants were aged between 18 and 39 years. The majority (82.0%) of participants had  
 234 post-graduate education level. The majority (59.3%) had reported no symptoms of COVID-19  
 235 in the past two months. Approximately one fifth of participants had previously been screened  
 236 for SARS-CoV-2 infection by molecular testing of nasopharyngeal swab, of whom 13.4% had  
 237 a positive result (Table 1).

238

239 **Table 1.** The demographic characteristics and medical history of the 167 study participants.

| Variable                                                                             | Items               | Number (%)  |
|--------------------------------------------------------------------------------------|---------------------|-------------|
| <b>Sex</b>                                                                           |                     |             |
|                                                                                      | Male                | 79 (47.3)   |
|                                                                                      | Female              | 88 (52.7)   |
| <b>Age (years)</b>                                                                   |                     |             |
|                                                                                      | 18 – 39             | 88 (52.7)   |
|                                                                                      | ≥ 40                | 79 (47.3)   |
|                                                                                      | Mean (SD)           | 38.6 (13.8) |
| <b>Educational level</b>                                                             |                     |             |
|                                                                                      | College level       | 14 (8.4)    |
|                                                                                      | High school level   | 16 (9.6)    |
|                                                                                      | Post-graduate level | 137 (82.0)  |
| <b>Had the symptoms of COVID-19 in the past two months<sup>#</sup></b>               |                     |             |
|                                                                                      | Yes                 | 68 (40.7)   |
|                                                                                      | No                  | 99 (59.3)   |
| <b>Previous COVID-19 molecular testing (nasopharyngeal swab)</b>                     |                     |             |
|                                                                                      | Yes                 | 34 (20.4)   |
|                                                                                      | No                  | 133 (79.6)  |
| <b>Previously diagnosed COVID-19 positive among those previously COVID-19 tested</b> |                     |             |
|                                                                                      | Yes                 | 22 (13.2)   |
|                                                                                      | No                  | 145 (86.8)  |

240 <sup>#</sup> Participants who reported having at least one of the following major symptoms associated or not with minor symptoms were  
 241 considered to have the COVID-19 symptom: fever, fatigue, dry cough, anosmia and dyspnea. Minor symptoms were: pain, nasal  
 242 congestion, runny nose, sore throat or diarrhea.

243



244 COVID-19: Coronavirus disease 2019; RT-PCR: Reverse transcription-polymerase chain reaction; SD: Standard deviation.

245

246 **Substudy 1.** This substudy evaluated the ability of the 167 study participants to understand  
 247 the instructions for use of the Exacto<sup>®</sup> COVID-19 self-test (Biosynex Swiss SA). A large  
 248 majority ( $n=155$ ; 92.8%) of participants preferred to use the paper-based instructions whereas  
 249 only 12 (7.2%) participants used the video-based instructions. The analytical results of the  
 250 evaluation questionnaire are shown in Table 2. Overall, 149 (89.2%; 95% CI: 83.6–93.1)  
 251 participants correctly understood the instructions for use, thus correctly answering all 10  
 252 questions. The labeling index for understanding measuring the mean of the correct answers for  
 253 each question was 97.1% (95% CI: 93.3–98.8). The question concerning the non-detection of  
 254 the virus (SARS-CoV-2) by the self-test showed the highest rate (10.2%) of incorrect response.

255

256 **Table 2.** Analytical results of the evaluation questionnaire concerning the ability of the 167 study  
 257 participants to understand the instruction for use of the Exacto<sup>®</sup> COVID-19 self-test (Biosynex Swiss SA)  
 258 (substudy 1). The questions raising specific issues concerning the manipulation of the kit, the interpretation  
 259 of test results, and the consequence of test results, were asked by the observer and the answers were closed.

| Comprehension of labeling checklist*                                                                                                                 | Participants' responses |                       |                            |
|------------------------------------------------------------------------------------------------------------------------------------------------------|-------------------------|-----------------------|----------------------------|
|                                                                                                                                                      | True<br>[number (%)]    | False<br>[number (%)] | Don't know<br>[number (%)] |
| Q1: "A capital letter is associated with each component of the kit to better identify it during the performance of self-test"                        | 166 (99.4)              | -                     | 1 (0.6)                    |
| Q2: "The blood collection device (lancet) helps to collect the blood and transfer it immediately into the SQUARE well of self-test with the pipette" | 165 (98.8)              | 1 (0.6)               | 1 (0.6)                    |
| Q3: "Two drops of diluent should be placed in the same well as the drop of blood"                                                                    | 2 (1.2)                 | 163 (97.6)            | 2 (1.2)                    |
| Q4: "A timer (watch or mobile) to clock 10 minutes before reading the result is need"                                                                | 167 (100)               | -                     | -                          |
| Q5: "Presence of a readable strip next to IgM and/or IgG on the self-test cassette means that the test is positive"                                  | 166 (99.4)              | 1 (0.6)               | -                          |
| Q6: "Lack of band by test results is interpreted as a negative test"                                                                                 | 4 (2.4)                 | 162 (97.0)            | 1 (0.6)                    |
| Q7: "Lack of control band by test results should be interpreted as an invalid test"                                                                  | 167 (100)               | -                     | -                          |
| Q8: "Having symptoms less than 10 days before the test does not provide a reliable result"                                                           | 157 (94.0)              | 7 (4.2)               | 3 (1.8)                    |

|                                                                                      |                       |           |         |
|--------------------------------------------------------------------------------------|-----------------------|-----------|---------|
| Q9: “If the test is positive it means that they have been in contact with the virus” | 163 (97.6)            | 3 (1.8)   | 1 (0.6) |
| Q10: “The Exacto® COVID-19 self-test does not detect the presence of the virus”      | 148 (88.6)            | 17 (10.2) | 2 (1.2) |
| <i>Labeling index for understanding (% [95% CI])<sup>‡</sup></i>                     | 97.1 [93.3–98.8]      |           |         |
| <i>Correct understanding of the instruction for use (n; % [95% CI])<sup>#</sup></i>  | 149; 89.2 [83.6–93.1] |           |         |

260 \* Overall, 155 (92.8%) participants preferred to use the paper-based instruction whereas only 12 (7.2%) participants used the video-based  
 261 instruction;

262 ‡ The labeling index for understanding was defined as the mean of the correct answers for each question;

263 # The participants who correctly answered all 10 questions were considered to have correctly understood the instructions for use.

264

265 CI: Confidence interval; COVID-19: Coronavirus disease 2019; Q: Question.

266

267 **Substudy 2.** This substudy evaluated the ability of participants to use the Exacto® COVID-  
 268 19 self-test (Biosynex Swiss SA) in a supervised setting. The results of the questionnaire are  
 269 shown in Table 3. Overall, all participants (100%; 95% CI: 95.6–100) performed the self-test  
 270 and succeeded in obtaining a valid test result with an overall usability index of 98.5% (95% CI:  
 271 93.0–99.7). Seventy (83.1%; 95% CI: 75.0–90.6) participants correctly used the self-test  
 272 without any difficulties, errors, and help, whereas 12 (14.5%; 95% CI: 8.5–23.6) had asked for  
 273 verbal help. The identification of the different components of the kit, the use of the lancet and  
 274 pipette, and the transfer of blood were the steps requiring the most frequent verbal help in 1.2%,  
 275 2.4%, 8.4%, and 2.4%, respectively (Table 3). Interestingly, all participants (n=6; 7.2%) using  
 276 the video instructions performed the self-test easily (usability index of 100%) without any  
 277 difficulties, errors, and help. Overall, the mean time of  self-test performance (since the  
 278 opening of the box until the migration step) was 8.8 (SD: 3.0) minutes.

279

280 **Table 3.** Analytical results of the manipulation observation concerning the ability of the randomly selected  
 281 83 study participants to correctly use each step of the Exacto® COVID-19 self-test (Biosynex Swiss SA)  
 282 autonomously or with verbal help (substudy 2).

| Usability checklist*                                                                                                  | Successful manipulation |                    | Need for verbal help |
|-----------------------------------------------------------------------------------------------------------------------|-------------------------|--------------------|----------------------|
|                                                                                                                       | Yes<br>[number (%)]     | No<br>[number (%)] | Yes<br>[number (%)]  |
| 1. Did the participant read the instruction for use?                                                                  | 83 (100)                | -                  | -                    |
| 2. Did the participant easily identify the different components of the kit?                                           | 82 (98.8)               | 1 (1.2)            | 1 (1.2)              |
| 3. Did the participant wash his hands?                                                                                | 83 (100)                | -                  | -                    |
| 4. Did the participant properly remove the test cassette from the aluminum pouch?                                     | 81 (97.6)               | 2 (2.4)            | -                    |
| 5. Did the participant open the diluent vial correctly?                                                               | 83 (100)                | -                  | -                    |
| 6. Did the participant disinfect his finger correctly?                                                                | 83 (100)                | -                  | -                    |
| 7. Did the participant wipe residual alcohol with the compress?                                                       | 82 (98.8)               | 1 (1.2)            | -                    |
| 8. Did the participant have difficulty lancing their finger?                                                          | 2 (2.4)                 | 81 (97.6)          | 2 (2.4)              |
| 9. Did the participant have difficulty forming a blood droplet?                                                       | 1 (1.2)                 | 82 (98.8)          | -                    |
| 10. Did the participant have difficulty using the pipette correctly until it was filled up to the blank line?         | 7 (8.4)                 | 76 (91.6)          | 7 (8.4)              |
| 11. Did the participant correctly transfer and deposit the blood into the SQUARE well of the test cassette?           | 81 (97.6)               | 2 (2.4)            | 2 (2.4)              |
| 12. Did the participant shed two drops of diluent in the ROUND well of the test cassette?                             | 83 (100)                | -                  | -                    |
| 13. Did the Participant obtain an interpretable result at the end of the process despite a missed or incorrect step?# | 83 (100)                | -                  | -                    |
| <i>Usability index and overall need for help (% [95% CI])<sup>‡</sup></i>                                             | 98.5 [93.0–99.7]        |                    | 14.5 [8.5–23.6]      |
| <i>Correct use without difficulties, errors, and helps (n; % [95% CI])</i>                                            | 70; 83.1 [75.0–90.6]    |                    |                      |
| <i>Average time of manipulation (minutes [SD])</i>                                                                    | 8.8 [3.0]               |                    |                      |

283 \* 6 (7.2) participants had used the video-based instruction for use; among them the usability index was estimated to 100% without any  
284 difficulties, errors, and help;

285 # The result was considered interpretable when a control strip was readable after the migration time recommended by the manufacturer;  
286 in the present series, 11 (13.3%) participants had a positive self-test result;

287 <sup>‡</sup>The usability index was defined as the mean of the correct answers for each question.

288

289 CI: Confidence interval; SD: Standard deviation.

290

291

292 **Substudy 3.** This substudy evaluated the ability of participants to read and interpret the  
293 COVID-19 self-test results after **successive** random selection of four tests from a panel of eight  
294 standardized tests. The results are depicted in Fig 4. Overall, 336 standardized tests were read  
295 and interpreted by the 84 participants, including 171 positive, 84 negative, and 81 invalid test  
296 results. A total of 331 (98.5%; 95% CI: 96.5–99.4) tests were correctly interpreted, whereas 5  
297 (1.5%; 95% CI: 0.6–3.5) tests were misinterpreted. Misinterpretation occurred in 2.3% (n=4)

298 of positive tests (all tests were weakly positive for IgM tests falsely interpreted as negative) and  
299 in 1.2% (n=1) of invalid tests falsely interpreted as negative. Cohen's  $\kappa$  coefficient between the  
300 results of reading by participants and the expected results was 0.98, demonstrating an excellent  
301 concordance.

302

303 **Fig 4.** Stacked columns showing the ability of participants to read and interpret (correctly or  
304 incorrectly) the 336 results of the Exacto<sup>®</sup> COVID-19 self-test (Biosynex Swiss SA) obtained  
305 from successive random selection of a panel of 8 standardized tests, including four positive,  
306 two negative, and two invalid test results.

307

308 **Substudy 4.** This substudy assessed the pre-test and post-test satisfaction of participants  
309 concerning the instructions for use (substudy 1), performing the COVID-19 self-test (substudy  
310 2), and the interpretation of test results (substudy 3). The results of the questionnaire are shown  
311 in Table 4. The understanding of the instructions for use of the self-test was considered easy in  
312 pre-test satisfaction questionnaire as well as in post-test period (100% *versus* 97.6%; not  
313 significant). However, 92.8% of participants found that the sample collection was very easy in  
314 pre-test satisfaction questionnaire whereas this satisfaction decreased after self-testing to  
315 71.1%, yielding a difference of -21,7 (95% CI: -31.7 to -11.7;  $P < 0.001$ ). Similar decrease was  
316 observed with the satisfaction of sample transfer (81.2% *versus* 60.2%; difference: -21.0%  
317 [95% CI: -30.9 to 11.1];  $P < 0.001$ ). Concerning the interpretation of test results, the participants  
318 found it easy in pre-test satisfaction questionnaire as well as in post-test period (100% *versus*  
319 98.8%; not significant). Finally, when asked about the ability to surmount the difficulties  
320 encountered during COVID-19 self-testing, all (100%) participants found it easy (97.0% very  
321 easy; 3.0% rather easy).

322

323 **Table 4.** Items and results of the pre-test and post-test satisfaction questionnaire and concerning the  
 324 instruction notice (substudy 1), the performing of the Exacto COVID-19 self-test (Biosynex Swiss SA)  
 325 (substudy 2), and the interpretation of test results (substudy 3).

| Satisfaction questionnaire                                                                   | Pre-test satisfaction<br>[number (%)] | Post-test satisfaction<br>[number (%)] | Difference*<br>% [95% CI] | P-value# |
|----------------------------------------------------------------------------------------------|---------------------------------------|----------------------------------------|---------------------------|----------|
| How did you find the understandability of instructions for use of self-test? (N=167)         |                                       |                                        |                           |          |
| Very easy                                                                                    | 156 (93.4)                            | 153 (91.6)                             | -1.8 (-5.1 to +1.5)       | NS       |
| Rather easy                                                                                  | 11 (6.6)                              | 10 (6.0)                               | -0.6 (-3.3 to +2.1)       | NS       |
| Rather difficult                                                                             | 0 (0)                                 | 2 (1.2)                                | +1.2 (-1.8 to +4.2)       | NS       |
| Very difficult                                                                               | 0 (0)                                 | 2 (1.2)                                | +1.2 (-1.8 to +4.2)       | NS       |
| How did you find the identification of the different components of the self-test kits (N=83) |                                       |                                        |                           |          |
| Very easy                                                                                    | 81 (97.6)                             | 80 (96.4)                              | -1.2 (-6.5 to +4.3)       | NS       |
| Rather easy                                                                                  | 2 (2.4)                               | 3 (3.6)                                | +1.2 (-4.1 to +6.5)       | NS       |
| Rather difficult                                                                             | 0 (0)                                 | 0 (0)                                  | -                         | NA       |
| Very difficult                                                                               | 0 (0)                                 | 0 (0)                                  | -                         | NA       |
| How did you find the sample collection? (N=83)                                               |                                       |                                        |                           |          |
| Very easy                                                                                    | 77 (92.8)                             | 59 (71.1)                              | -21.7 (-31.7 to -11.7)    | <0.001   |
| Rather easy                                                                                  | 5 (6.0)                               | 20 (24.1)                              | +18.1 (+11.3 to +27.7)    | <0.001   |
| Rather difficult                                                                             | 0 (0)                                 | 1 (1.2)                                | +1.2 (-4.1 to +6.5)       | NS       |
| Very difficult                                                                               | 1 (1.2)                               | 3 (3.6)                                | +2.4 (-3.5 to 8.3)        | NS       |
| How did you find the sample transfer? (N=83)                                                 |                                       |                                        |                           |          |
| Very easy                                                                                    | 68 (81.2)                             | 50 (60.2)                              | -21.0 (-30.9 to 11.1)     | <0.001   |
| Rather easy                                                                                  | 14 (16.9)                             | 25 (30.1)                              | +13.2 (+4.3 to +22.1)     | 0.043    |
| Rather difficult                                                                             | 0 (0)                                 | 2 (2.4)                                | +2.4 (-3.5 to +8.3)       | NS       |
| Very difficult                                                                               | 1 (1.2)                               | 6 (7.2)                                | +6.0 (-1.3 to +13.3)      | NS       |
| How did you find the overall performance of self-test? (N=83)                                |                                       |                                        |                           |          |
| Very easy                                                                                    | 80 (96.4)                             | 77 (92.8)                              | -3.6 (-10.1 to +2.9)      | NS       |
| Rather easy                                                                                  | 2 (2.4)                               | 6 (7.2)                                | +4.8 (-2.1 to +11.7)      | NS       |
| Rather difficult                                                                             | 1 (1.2)                               | 0 (0)                                  | -1.2 (-6.5 to +4.3)       | NS       |
| Very difficult                                                                               | 0 (0)                                 | 0 (0)                                  | -                         | NA       |
| How did you find the reading of strips after migration? (N=84)                               |                                       |                                        |                           |          |
| Very easy                                                                                    | 73 (86.9)                             | 70 (83.3)                              | -3.6 (-10.0 to +3.0)      | NS       |
| Rather easy                                                                                  | 8 (9.5)                               | 10 (11.9)                              | +2.4 (-3.4 to 8.4)        | NS       |
| Rather difficult                                                                             | 2 (2.4)                               | 3 (3.6)                                | +1.2 (-4.0 to +6.4)       | NS       |
| Very difficult                                                                               | 1 (1.2)                               | 1 (1.2)                                | -                         | NA       |
| How did you find the interpretation of self-test results (N=84)                              |                                       |                                        |                           |          |
| Very easy                                                                                    | 76 (90.5)                             | 76 (90.5)                              | -                         | NA       |
| Rather easy                                                                                  | 8 (9.5)                               | 7 (8.3)                                | -1.2 (-6.4 to +4.2)       | NS       |
| Rather difficult                                                                             | 0 (0)                                 | 0 (0)                                  | -                         | NA       |
| Very difficult                                                                               | 0 (0)                                 | 1 (1.2)                                | +1.2 (-4.0 to +6.4)       | NS       |
| How did you find your ability to surmount the difficulties encountered (N=167)               |                                       |                                        |                           |          |
| Very easy                                                                                    | -                                     | 162 (97.0)                             | NA                        | NA       |
| Rather easy                                                                                  | -                                     | 5 (3.0)                                | NA                        | NA       |
| Rather difficult                                                                             | -                                     | 0                                      | NA                        | NA       |
| Very difficult                                                                               | -                                     | 0                                      | NA                        | NA       |

326 \* Difference and CI were assessed with the Wilson score bounds using data collected in the post-test satisfaction questionnaire paired to those

327 from the pre-test satisfaction questionnaire;

328 # P-value calculated using Mac Nemar's test of paired data.

329

330 CI: Confidence interval; NA: Not applicable; NS: Not significant.

331

332 **Discussion**

333

334 We herein report on our recent experience during the last COVID-19 epidemic peak  
335 period of the practicability of a prototype capillary whole-blood COVID-19 self-test for IgG  
336 and IgM against SARS-CoV-2 serological screening among adult volunteers living in France.  
337 Our assessment of usability was made with reference to our previous experience in evaluating  
338 HIV self-testing according to the WHO recommendations [26]. Overall, the vast majority of  
339 participants correctly understood the instructions for use, showed good ability to carry out the  
340 self-testing procedure in order to obtain a valid test result, and demonstrated to be capable to  
341 correctly interpret the test results with high degree of satisfaction. Only a minority of  
342 participants needed verbal help, and only 1.5% of test results were misinterpreted. Taken  
343 together, our pilot study generated for the first-time to our knowledge evidence on generally  
344 good practicability of COVID-19 self-testing for serological IgG and IgM immune status,  
345 despite some limitations. These findings also provide the observational basis for the possibility  
346 of using with high confidence self-tests harboring 3 bands of interest, *i.e.* in the case of the  
347 prototype COVID-19 self-test, the control, IgG and IgM bands. Finally, our observations lay  
348 the foundations for the potential large-scale use of COVID-19 self-test in lay adults, at least  
349 Eurons, to complete the arsenal of available serological tests used to assess the immune  
350 status vis-a-vis SARS-CoV-2.

351 **Substudy 1.** The learning process in different fields of science needs to link theory  
352 to practice [29]. The expected results of substudy 1 are, therefore, important for the following  
353 practicability substudies 2 and 3, because it is mandatory to check that the instructions for use

354 can be read and understood by all users. Our findings showed that 89.2% of participants  
355 correctly answered all 10 questions indicating generally correct understanding of the key  
356 messages delivered by the instructions for use of the Exacto<sup>®</sup> COVID-19 self-test (Biosynex  
357 Swiss SA), with an overall rate of good responses of 97.1%. These satisfactory results may be  
358 explained in part by the high post-graduate education level of the majority of study participants.  
359 Indeed, previous experience from HIV self-testing showed that insufficient educational level  
360 constitutes a great challenge in the comprehension of the instructions for use [18,30-32].  
361 Although systematic reviews and meta-analysis have shown that HIV self-testing can be  
362 successfully conducted by untrained users without in-person demonstrations [31], our  
363 observations emphasize the need to complete the classical paper instructions for use by other  
364 instructional tools such as short video film, which was preferred by 1 of 13 study participants  
365 for better instructions for use understanding. These findings are reminiscent to previous WHO  
366 recommendations for HIV self-test stating that all self-testers should have the possibility to  
367 access or receive assistance over the phone, through the internet, or with additional instructions  
368 such as video, animations, or diagrams [15].

369 **Substudy 2.** All study participants carried out the COVID-19 self-test and  
370 succeeded in obtaining a valid test result with an overall usability index estimated at 98.5%.  
371 Some difficulty in the correct use of the pipette to transfer the blood sample was the principal  
372 reported concern encountered and was the most common reason for oral help. In previous  
373 reports on HIV self-testing, the difficulties in self-lancing and blood transfer to the cassette  
374 were also observed by lay users [33]. These features underline the importance of video  
375 instructions, when available. In the present series, all participants using the video instructions  
376 did not need any help and used the pipette without any difficulty  error. The use of a hotline  
377 could also offer direct distant assistance.

378 **Substudy 3.** The ability to correctly read and interpret the self-test results is  
379 considered as a cassette step in self-testing [34]. This refers not only to the visual subjectivity  
380 related to good visual acuity (*i.e.* eye without illness) when reading and interpreting the results,  
381 but also to the number of bands to read on the test strip. Indeed, the Exacto<sup>®</sup> COVID-19 self-  
382 test (Biosynex Swiss SA) has three bands, one of which is for the internal control and two for  
383 the detection of IgG and IgM antibodies. The interpretation of a weak positive band may be  
384 therefore difficult for untrained users. In our series, the rate (98.8%) of correct interpretation of  
385 COVID-19 self-test results was high, as previously reported with HIV self-test using similar  
386 cassette [17,18]. However, the majority (80%) of misinterpreted test results concerned a weak  
387 positive IgM band. This difficulty in reading some weak positive bands and in final  
388 interpretation of test results can even occur in lay users as well as trained-users during  
389 professional testing [35].

390 On the other hand, the interpretation of positive results with the serological IgM and  
391 IgG test of SARS-CoV-2 presents particularities in this period of the ongoing outbreak. While  
392 positive serology for other viral infections such as HIV means an active infection [36], a  
393 positive test result with the Exacto<sup>®</sup> COVID-19 self-test (Biosynex Swiss SA) rather indicates  
394 ongoing or previous SARS-CoV-2 infection, with serological immune IgG or IgM immune  
395 responses to SARS-CoV-2. Furthermore, the presence of IgM alone or with IgG means that the  
396 **contact with the virus was relatively recent**. The presence of IgG means that the contact with  
397 the virus occurred at least 14 days ago [37]. Thus, a positive test result on the COVID-19 self-  
398 test does not mean that the SARS-CoV-2 infection is still active. Despite the explanations were  
399 clearly given in the instructions for use, 10.2% of study participants were not aware that the  
400 COVID-19 self-test does not detect the presence of the virus. This misinterpretation of positive  
401 test results can provide unfortunate consequences such as self-medication or **neuro-****psychiatric**  
402 **disorders** of variable intensity, especially in a person not psychologically prepared [38].



403           **Substudy 4.** The pre-test and post-test answers to the satisfaction questionnaire  
404 concerning the instructions for use (substudy 1), performing the self-test (substudy 2), and the  
405 interpretation of the results (substudy 2), showed that the large majority of the COVID-19 self-  
406 testing steps were considered easy by participants, as previously reported for HIV self-testing  
407 using similar rapid test cassette [17,18]. However, the satisfaction with sample collection and  
408 blood transfer to the test cassette evolved from “very easy” in pre-test period to “rather easy”  
409 after having performed the self-test. This latter observation reminds us our previous experience  
410 with HIV self-testing, during which the fear of self-sticking provided capillary blood sample  
411 collection difficult in a minority of lay user [18].

412           **Strengths and limitations.** Our study is original by highlighting for the first  
413 time the usability of COVID-19 self-test, as a novel approach to assess SARS-CoV-2-specific  
414 humoral immunity by using rapid diagnostic test and self-interpretation of the results. Our study  
415 also shows for the first time the possibility of correctly interpreting three bands on the strip of  
416 a rapid diagnostic test by lay users from general adult population. However, the study has some  
417 limitations. First, the presence of an observer may lead to a bias in our observations concerning  
418 the participants' ability to perform the tests and to interpret the results. Furthermore, the low  
419 sample size could **reduce the study's power**. Finally, further steps are needed to improve mass  
420 screening for COVID-19, including the development of other tests such as oral fluid based self-  
421 testing, antigen self-testing, as well as home self-sampling.

422           According to the WHO [39], generalization of COVID-19 testing is key to controlling  
423 the spread of SARS-CoV-2 infection. In particular, the findings derived from serological assays  
424 can provide valuable information that would help to support the diagnosis, treatment and  
425 prevention of SARS-CoV-2 infection [40]. During the COVID-19 epidemic, **community**  
426 approaches using individual involvement were proposed in addition to the collective public  
427 health approach, and both strategies were furthermore sometimes combined. For example, self-

428 collected upper respiratory tract swabs for COVID-19 test has been shown as a feasible way to  
429 increase overall testing rate in South Africa [41], and the US Food and Drug Administration  
430 has approved the first kit for self-collected saliva specimen to be used for molecular testing of  
431 SARS-CoV-2 [42]. Self-diagnosis of breathing complications from breathing sounds using the  
432 smartphone's microphone has been proposed as an appealing resolution for COVID-19 self-  
433 testing [43]. Self-reporting of an illness consistent with COVID-19 and artificial intelligence-  
434 coupled self-testing and tracking systems for COVID-19 have been developed using mobile  
435 phone applications [44,45]. While the place of SARS-CoV-2-specific serology remains  
436 controversial [46,47], the indications for the COVID-19 serological self-test have been the  
437 matter of poor attention from official agencies until now and remain to be defined [48]. It seems  
438 obvious that the motivations for carrying out a COVID-19 self-test would be clearly different  
439 than those which push to carry out an HIV self-test, but this problematic exceeds the aim of our  
440 study. The COVID-19 self-test allows an individual to test himself simply and quickly, without  
441 visiting a care structure, with the essential aim of knowing if the person is in the course of  
442 infection (presence of specific IgM alone) or has had a past infection (presence of specific  
443 IgG, alone or associated with IgM). Thus, COVID-19 self-test for serological screening  
444 could be proposed to identify exposed patients that are presumptively immune to SARS-CoV-  
445 2 secondary to ongoing or past-infection and to quantify the prevalence of exposure within a  
446 population for epidemiologic purposes. The instructions for use clearly explains that the lack  
447 of reactivity does not eliminate a SARS-CoV-2 infection in progress, and that in the presence  
448 of any IgG or IgM reactivities the patient must refer to a health care structure for clinical-  
449 biological confirmation. In any case, the presence of reactivities could constitute an  
450 "immunological passport" of protection [46,47], because it is not known if anti-SARS-CoV-2  
451 antibodies are protective at this time, although the general assumption is that the presence of  
452 antibodies will provide at least some immunity [49]. While specific guidelines regarding how

453 “presumptive immunity” will be determined and used do not exist, this potential use has  
454 probably generated the **most excitement** in the lay public [47]. In any case, an IgG positive  
455 COVID-19 self-test result may indicate recovery of a previous SARS-CoV-2 infection, even  
456 asymptomatic or mild, **and would allow** **take more moderate precautions and also to**  
457 **comfortably interact with other COVID-19-seropositive individuals.** Interestingly, serological  
458 home testing could be associated with at-home saliva or swab self-sampling for further SARS-  
459 CoV-2 molecular diagnosis, and the widespread use of both home approaches **would be hugely**  
460 **beneficial to public health.** Those whom the viral test indicates an active SARS-CoV-2 infection  
461 (including silent carriers and patients with early or mild symptoms) **will be able to take**  
462 **informed actions, such as self-isolation.** Furthermore, the risk exposure of the healthy  
463 population will be mitigated by the actions taken by the (informed) infected population, thus  
464 slowing the spread of the coronavirus and flattening the curve. Importantly, a confirmed  
465 population of “recovered” individuals **would allow** **any to return to work,** lead to partial lifting  
466 of “stay-at-home” or “shelter-in-place” orders, and would help get the economy back to normal,  
467 with no loss in protection for the most vulnerable. Recently, the British government, UK, are  
468 making available SARS-CoV-2 antibody home tests for healthcare workers and the general  
469 public [50]. Home testing will be voluntary, but there is no doubt more people will test if the  
470 tests are free. Removing financial barriers to self-testing by making publicly-funded tests  
471 available free to the entire population **will help** maximize rapid implementation and help  
472 COVID-19-affected country to recover and get back to work.

473       Until a cure or a vaccine becomes available, antibody and viral testing for SARS-CoV-  
474 2 infection will play a critical role in limiting the pandemic and containing its economic damage  
475 to individuals and the country. Our features demonstrate that COVID-19 self-testing for  
476 serological immune status assessment is highly feasible with potential for use by **the general**  
477 **public.** If deployed wisely, it **will be** complementary to other serological screening tools and

478 could offer an immediate and easy solution for SARS-CoV-2 serology, especially during  
479 recovery or de-confinement periods.

480

481 **Acknowledgments.** The authors are grateful to the volunteers for their willingness  
482 to participate in the study. We also thank Biosynex, Strasbourg, France, for providing the  
483 Exacto® COVID-19 self-tests for the study. Dr. Serge Tonen-Wolyec was recipient of  
484 ERASMUS+ program between the University of Kisangani, Democratic Republic of the  
485 Congo, and the University of Liège, Belgium.

486

487

488

489

## 490 **References**

491

- 492 1. Zhu N, Zhang D, Wang W, Li X, Yang B, Song J, et al. A novel coronavirus from patients with pneumonia in  
493 China, 2019. *N Engl J Med.* 2020;382:727–733.
- 494 2. Guan W, Ni Z, Hu Y, Liang W, Ou C, He J, et al. Clinical Characteristics of Coronavirus Disease 2019 in  
495 China. *N Engl J Med.* 2020;382:1708–1720.
- 496 3. Huang C, Wang Y, Li X, Ren L, Zhao J, Hu Y, et al. Clinical features of patients infected with 2019 novel  
497 coronavirus in Wuhan, China. *Lancet.* 2020;395:497–506.
- 498 4. World Health Organization. Coronavirus disease (COVID-19) outbreak. Available from: <https://www.who.int>  
499 (last access 13 June 2020).
- 500 5. Wölfel R, Corman VM, Guggemos W, Seilmaier M, Zange S, Müller MA, et al. Virological assessment of  
501 hospitalized patients with COVID-2019. *Nature.* 2020;581:465–469.
- 502 6. Péré H, Podglajen I, Wack M, Flamarion E, Mirault T, Goudot G, et al. Nasal Swab Sampling for SARS-CoV-  
503 2: a Convenient Alternative in Times of Nasopharyngeal Swab Shortage. *J Clin Microbiol.* 2020 May  
504 26;58(6):e00721-20.

- 505 7. Amanat F, Stadlbauer D, Strohmeier S, Nguyen THO, Chromikova V, McMahon M, et al. A serological assay  
506 to detect SARS-CoV-2 seroconversion in humans. *Nat Med.* 2020 May 12. doi: 10.1038/s41591-020-0913-5.  
507 Online ahead of print.
- 508 8. Long QX, Liu BZ, Deng HJ, Wu GC, Deng K, Chen YK, et al. Antibody responses to SARS-CoV-2 in patients  
509 with COVID-19. *Nat Med.* 2020 Jun;26(6):845-848.
- 510 9. Petherick A. 2020. Developing antibody tests for SARS-CoV-2. *Lancet* 395:1101–1102.
- 511 10. World Health Organization. 2020. Laboratory testing for coronavirus disease 2019 (COVID-19) in suspected  
512 human cases: interim guidance, 2 March 2020. World Health Organization. Available from:  
513 [https://apps.who.int/iris/bitstream/handle/10665/331329/WHO-COVID-19-laboratory-2020.4-](https://apps.who.int/iris/bitstream/handle/10665/331329/WHO-COVID-19-laboratory-2020.4-eng.pdf?sequence=1&isAllowed=y)  
514 [eng.pdf?sequence=1&isAllowed=y](https://apps.who.int/iris/bitstream/handle/10665/331329/WHO-COVID-19-laboratory-2020.4-eng.pdf?sequence=1&isAllowed=y) (last access 21 June 2020).
- 515 11. Li Z, Yi Y, Luo X, Xiong N, Liu Y, Li S, et al. Development and clinical application of a rapid IgM-IgG  
516 combined antibody test for SARS-CoV-2 infection diagnosis. *J Med Virol.* 2020 Feb 27;10.1002/jmv.25727.
- 517 12. Pérez-García F, Pérez-Tanoira R, Romanyk J, Arroyo T, Gómez-Herruz P, Cuadros-González J. Alltest rapid  
518 lateral flow immunoassays is reliable in diagnosing SARS-CoV-2 infection from 14 days after symptom onset:  
519 A prospective single-center study. *J Clin Virol.* 2020 May 27;129:104473.
- 520 13. Dellière S, Salmona M, Minier M, Gabassi A, Alanio A, Le Goff J, et al. Evaluation of COVID-19 IgG/IgM  
521 Rapid Test from Orient Gene Biotech. *J Clin Microbiol.* 2020 Jun 9;JCM.01233-20.
- 522 14. Zainol Rashid Z, Othman SN, Abdul Samat MN, Ali UK, Wong KK. Diagnostic Performance of COVID-19  
523 Serology Assays. *Malays J Pathol.* 2020 Apr;42(1):13-21.
- 524 15. World Health Organization. Guidelines on HIV self-testing and partner notification: supplement to  
525 consolidated guidelines on HIV testing services. December 2016. Available from:  
526 [http://apps.who.int/iris/bitstream/handle/10665/251655/9789241549868-](http://apps.who.int/iris/bitstream/handle/10665/251655/9789241549868-eng.pdf;jsessionid=B043673B59952F021C313F076554ABA6?sequence=1)  
527 [eng.pdf;jsessionid=B043673B59952F021C313F076554ABA6?sequence=1](http://apps.who.int/iris/bitstream/handle/10665/251655/9789241549868-eng.pdf;jsessionid=B043673B59952F021C313F076554ABA6?sequence=1). (last access 28 May 2020).
- 528 16. World Health Organization & UNITAID. Market and Technology Landscape. HIV rapid diagnostic tests for  
529 self-testing, 4th Edition. July 2018. Available from: <https://unitaid.org/assets/HIVST-landscape-report.pdf>  
530 (last access 18 June 2020).
- 531 17. Prazuck T, Karon S, Gubavu C, Andre J, Legall JM, Bouvet E, et al. A finger-stick whole-blood HIV self-test  
532 as an HIV screening tool adapted to the general public. *PloS One.* 2016;11(2):e0146755.
- 533 18. Tonen-Wolyec S, Batina-Agasa S, Muwonga J, Fwamba N’kulu F, Mboumba Bouassa RS, Belec L. Evaluation  
534 of the practicability and virological performance of finger-stick whole-blood HIV self-testing in French-

- 535 speaking sub-Saharan Africa. PLoS One 2018; 13: e0189475.
- 536 19. Tonen-Wolyec S, Batina-Agasa S, Longo JD, Mboumba Bouassa RS, Bélec L. Insufficient education is a key  
537 factor of incorrect interpretation of HIV self-test results by female sex workers in Democratic Republic of the  
538 Congo: A multicenter cross-sectional study. *Medicine (Baltimore)*. 2019 Feb;98(6):e14218.
- 539 20. Tonen-Wolyec S, Batina-Agasa S, Muwonga J, Mboumba Bouassa RS, Kayembe Tshilumba C, Bélec L.  
540 Acceptability, feasibility, and individual preferences of blood-based HIV self-testing in a population-based  
541 sample of adolescents in Kisangani, Democratic Republic of the Congo. *PLoS One*. 2019 Jul  
542 1;14(7):e0218795.
- 543 21. Tonen-Wolyec S, Mboumba Bouassa RS, Batina-Agasa S, Tepungipame AT, Tshilumba CK, Bélec L.  
544 Sociodemographic characteristics of adolescents preferring home-based HIV self-testing over facility-based  
545 voluntary counseling and testing: a cross-sectional study in Kisangani, Democratic Republic of the Congo. *Int  
546 J STD AIDS*. 2020 Apr;31(5):481-487.
- 547 22. Ministère des Solidarités et de santé. Tests COVID-19, guider votre choix parmi les 155 tests Covid-19 du  
548 marché. France 2020. Available from: <https://covid-19.sante.gouv.fr/tests>. (last access 20 June 2020)
- 549 23. Haute Autorité de Santé. Cahier des charges définissant les modalités d'évaluation des performances des tests  
550 sérologiques détectant les anticorps dirigés contre le SARS-CoV-2. Saint-Denis, France, 2020. Available from:  
551 [https://www.has-sante.fr/upload/docs/application/pdf/2020-  
552 04/cahier\\_des\\_charges\\_test\\_serologique\\_covid19.pdf](https://www.has-sante.fr/upload/docs/application/pdf/2020-04/cahier_des_charges_test_serologique_covid19.pdf). (last access 20 June 2020)
- 553 24. Laboratoire Biosynex. TEST COVID-19 BIOSYNEX SA (FR). Available from:  
554 <https://www.youtube.com/watch?v=iN1P2y36vow>. (last access 30 June 2020)
- 555 25. Santé publique France. COVID-19 : point épidémiologique du 2 juillet 2020. Available from:  
556 [https://www.santepubliquefrance.fr/maladies-et-traumatismes/maladies-et-infections-respiratoires/infection-  
557 a-coronavirus/documents/bulletin-national/covid-19-point-epidemiologique-du-2-juillet-2020](https://www.santepubliquefrance.fr/maladies-et-traumatismes/maladies-et-infections-respiratoires/infection-a-coronavirus/documents/bulletin-national/covid-19-point-epidemiologique-du-2-juillet-2020). (last access 02  
558 July 2020)
- 559 26. World Health Organization (WHO) WHO prequalification: Sample product dossier for an IVD intended for  
560 HIV self-testing. SIMU™ self-test for HIV 120 working document, December 2015.  
561 [http://www.who.int/sample\\_dos\\_self\\_testinghiv\\_for\\_public\\_c\\_\\_comment\\_v1\\_pdf](http://www.who.int/sample_dos_self_testinghiv_for_public_c__comment_v1_pdf). 2015. (last access 13 June  
562 2020).
- 563 27. Cohen J. A coefficient of agreement for nominal scales. *Educ. Psychol. Meas.* 1960;20:37-46.

- 564 28. Landis JR, Koch GG. The measurement of observer agreement for categorical data. *Biometrics*. 1997;33:159–  
565 174.
- 566 29. Neves BS, Altermann C, Gonçalves R, Lara MV, Mello-Carpes PB. Home-based vs. Laboratory-Based  
567 Practical Activities in the Learning of Human Physiology: The Perception of Students. *Adv Physiol Educ*. 2017  
568 Mar 1;41(1):89-93.
- 569 30. Tonen-Wolyec S, Mboup S, Grésenguét G, Bouassa RB, Bélec L. Insufficient education is a challenge for HIV  
570 self-testing. *Lancet HIV*. 2018; 5(7):e341.
- 571 31. Figueroa C, Johnson C, Ford N, Sands A, Dalal S, Meurant R, et al. Reliability of HIV rapid diagnostic tests  
572 for self-testing performed by self-testers compared to health-care workers: a systematic review and meta-  
573 analysis. *Lancet HIV*. 2018; 5(6):e277-e290.
- 574 32. Simwinga M, Kumwenda MK, Dacombe RJ, Kayira L, Muzumara A, Johnson CC, et al. Ability to understand  
575 and correctly follow HIV self-test kit instructions for use: applying the cognitive interview technique in Malawi  
576 and Zambia. *J Int AIDS Soc*. 2019 Mar; 22(Suppl Suppl 1): e25253.
- 577 33. Pant Pai N, Sharma J, Shivkumar S, Pillay S, Vadnais C, Joseph L, et al. Supervised and unsupervised self-  
578 testing for HIV in high- and low-risk populations: a systematic review. *PLoS Med*. 2013;10(4):e1001414.
- 579 34. Ortblad KF, Musoke DK, Ngabirano T, Nakitende A, Haberer JE, McConnell M, et al. Female sex workers  
580 often incorrectly interpret HIV self-test results in Uganda. *J Acquir Immune Defic Syndr* 2018;79:e42–5.
- 581 35. Tahlil KM, Ong JJ, Rosenberg NE, Tang W, Conserve DF, Nkengasong S, et al. Verification of HIV Self-  
582 Testing Use and Results: A Global Systematic Review. *AIDS Patient Care STDS*. 2020 Apr;34(4):147-156.
- 583 36. CDC, WHO, APL. Guidelines for Appropriate Evaluations of HIV Testing Technologies in Africa. 2001.
- 584 37. Sethuraman N, Jeremiah SS, Ryo A. Interpreting Diagnostic Tests for SARS-CoV-2. *JAMA*. 2020 May 6. doi:  
585 10.1001/jama.2020.8259.
- 586 38. Rogers JP, Chesney E, Oliver D, Pollak TA, McGuire P, Fusar-Poli P, et al. Psychiatric and neuropsychiatric  
587 presentations associated with severe coronavirus infections: a systematic review and meta-analysis with  
588 comparison to the COVID-19 pandemic. *Lancet Psychiatry*. 2020 Jul;7(7):611-627.
- 589 39. World Health Organization. Laboratory testing strategy recommendations for COVID-19. 22 Mar 2020.  
590 Available at : [https://apps.who.int/iris/bitstream/handle/10665/331509/WHO-COVID-19-lab\\_testing-2020.1-](https://apps.who.int/iris/bitstream/handle/10665/331509/WHO-COVID-19-lab_testing-2020.1-eng.pdf)  
591 [eng.pdf](https://apps.who.int/iris/bitstream/handle/10665/331509/WHO-COVID-19-lab_testing-2020.1-eng.pdf) (last access 24 June 2020).
- 592 40. Lee CY, Lin RTP, Renia L, Ng LFP. Serological Approaches for COVID-19: Epidemiologic Perspective on  
593 Surveillance and Control. *Front Immunol*. 2020 Apr 24;11:879.

- 594 41. Adeniji AA. 'Self-collected upper respiratory tract swabs for COVID-19 test': A feasible way to increase  
595 overall testing rate and conserve resources in South Africa. *Afr J Prim Health Care Fam Med*. 2020 May  
596 28;12(1):e1-e4.
- 597 42. Food and Drug Administration. FDA NEWS RELEASE. Coronavirus (COVID-19) Update: FDA Authorizes  
598 First Diagnostic Test Using At-Home Collection of Saliva Specimens. United states of America, 2020.  
599 Available at : [https://www.fda.gov/news-events/press-announcements/coronavirus-covid-19-update-fda-  
600 authorizes-first-diagnostic-test-using-home-collection-saliva](https://www.fda.gov/news-events/press-announcements/coronavirus-covid-19-update-fda-<br/>600 authorizes-first-diagnostic-test-using-home-collection-saliva) (last access: 24 June 2020).
- 601 43. Faezipour M, Abuzneid A. Smartphone-Based Self-Testing of COVID-19 Using Breathing Sounds. *Telemed  
602 J E Health*. 2020 Jun 2. doi: 10.1089/tmj.2020.0114.
- 603 44. McCullough PA, Eidt J, Rangaswami J, Lerma E, Tumlin J, Wheelan K, et al. Urgent need for individual  
604 mobile phone and institutional reporting of at home, hospitalized, and intensive care unit cases of SARS-CoV-  
605 2 (COVID-19) infection. *Rev Cardiovasc Med*. 2020 Mar 30;21(1):1-7.
- 606 45. Mashamba-Thompson TP, Crayton ED. Blockchain and Artificial Intelligence Technology for Novel  
607 Coronavirus Disease-19 Self-Testing. *Diagnostics (Basel)*. 2020 Apr 1;10(4):198.
- 608 46. Bélec L, Péré H, Mboumba Bouassa RS, Veyer D, Jenabian MA. Potential pitfalls of routine SARS-CoV-2  
609 serology for mass screening. *J Med Virol*. 2020 Jun 2;10.1002/jmv.26034.
- 610 47. Farnsworth CW, Anderson NW. SARS-CoV-2 Serology: Much Hype, Little Data. *Clin Chem*. 2020 Apr  
611 28:hvaa107.
- 612 48. Food and Drug Administration. FDA STATEMENT. Coronavirus (COVID-19) Update: FDA Alerts  
613 Consumers About Unauthorized Fraudulent COVID-19 Test Kits. United states of America, 2020. Available  
614 at : [https://www.fda.gov/news-events/press-announcements/coronavirus-covid-19-update-fda-alerts-  
615 consumers-about-unauthorized-fraudulent-covid-19-test-kits](https://www.fda.gov/news-events/press-announcements/coronavirus-covid-19-update-fda-alerts-<br/>615 consumers-about-unauthorized-fraudulent-covid-19-test-kits) (last access: 24 June 2020).
- 616 49. Jiang S, Hillyer C, Du L. Neutralizing Antibodies against SARS-CoV-2 and Other Human Coronaviruses.  
617 *Trends Immunol*. 2020 Apr 2.
- 618 50. NATURE VIDEO. We test a home antibody kit for tracking Covid-19. Easy-to-use postal tests may be  
619 important for monitoring community transmission. 04 JUNE 2020. Available at:  
620 <https://www.nature.com/articles/d41586-020-01677-y> (last access: 24 June 2020).



# Exacto COVID-19 SELF-TEST

## INTRODUCTION

Exacto COVID-19 self-test is a rapid immunochromatographic self-test for the qualitative detection of IgG and IgM antibodies against SARS-CoV-2 from a drop of capillary blood. The test consists of antigens specific to IgG and IgM antibodies of SARS-CoV-2. The self-test determines whether you have been in contact with the virus responsible for COVID-19.

COVID-19 is an acute respiratory illness caused by infection with SARS-CoV-2. SARS-CoV-2 belongs to the same family of viruses that cause Severe Acute Respiratory Syndrome (SARS). The most common symptoms of COVID-19 are fever, fatigue and a dry cough. Some patients may experience pain, nasal congestion, sore throat, sore eyes, loss of taste and smell. These symptoms are usually mild and begin gradually. Some people are infected but do not develop any symptoms. Most people recover about 10 to 14 days after the illness without the need for hospital care.

The disease can be spread from person to person through small droplets emitted from the nose or mouth when a person infected with COVID-19 coughs or sneezes. Transmission through contact of contaminated hands with the face is common. Viruses can become concentrated after touching surfaces and stay viable for days. The estimated incubation period for COVID-19 ranges from 1 to 14 days.

The Exacto COVID-19 self-test, based on antibody detection, can identify individuals who are unaware that they have been infected, either because they have never developed symptoms, or because they have symptoms that have never been properly diagnosed. This means that self-testing can identify silent infections, as well as people who have been sick but have recovered. This self-test does not detect the presence of the virus responsible for COVID-19, but it does detect the response of a patient's immune system against the COVID-19 virus.

The Exacto COVID-19 self-test will give a positive result in the majority of cases within 11 days of the onset of symptoms. A negative result with Exacto COVID-19 test in a symptomatic individual does not exclude COVID-19 infection. If symptoms suggestive of COVID-19 are present, a negative result should be followed up with a standard RT-PCR test after the first test.

## KIT CONTENTS

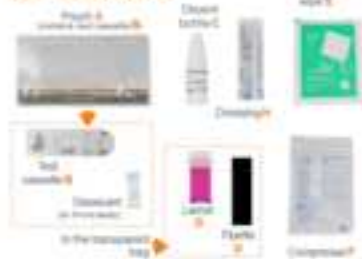

## TESTING GUIDELINES

- Wash your hands with warm water before and after the procedure. When using disposable lancets, use the lancet only once.
- You can let your hand sting for about a minute after your test as long as your blood can flow into it. It is recommended that you pinch your test hand for a right-handed person and your right hand for a left-handed person.
- If it is hard to pinch the fingers on the unit, this is where there is the most blood and the sensitivity is most acute when the skin is thinnest and therefore more difficult to pinch.
- If this happens that a drop does not fall right away in the case, you should wait a minute and massage over the finger lightly from the base to the puncture site.
- It is not necessary to form large drop of blood at the tip of your finger. The way the pipette will fill up with blood needs not quality.

# Instruction for use of the EXACTO COVID-19 SELF-TEST

## BLOOD COLLECTION

- 1 Please read the printed manual. Drawn you have a watch or a stopclock.
- 2 Wash your hands with soap and warm water and dry them before proceeding to the next step.
- 3 Open the box and remove all items from their packaging. Don't forget to remove the pipette and lancet from the bag. Place them on a clean, flat surface, ideally each item in the lid.
- 4 Tap the notch in front of the pipette. Remove carefully. Use the lid without contact.
- 5 Remove the cap of the lancet. Insert the lancet vertically on the white surface.
- 6 Push the lancet. It springs out. Hold the lancet. It springs out. Hold the lancet and press firmly to trigger the blade and pinch your finger.
- 7 Wipe off signs of alcohol for disinfection.
- 8 Remove the cap of the lancet by pulling it off.
- 9 Place the pipette. It springs out. Hold the pipette and press firmly to trigger the blade and pinch your finger.

- 10 Expose the pipette. It springs out. Hold the pipette and press firmly to trigger the blade and pinch your finger.
- 11 The pipette. It springs out. Hold the pipette and press firmly to trigger the blade and pinch your finger.
- 12 Fill pipette. It springs out. Hold the pipette and press firmly to trigger the blade and pinch your finger.

## TEST PROCEDURE

- 12 Drop the contents of the pipette into the square window. Do not touch the pipette.
- 13 Place 2 drops of blood in the round window. Do not touch the pipette.
- 14 Wait the stopwatch or note the time. Wait 10 minutes to read the result. Do not read beyond 20 minutes. During this time, you can apply the dressing in.

## PERFORMANCE

**Sensitivity and specificity**  
Exacto COVID-19 self-test was compared to the double-blind reference method. The double-blind 440 samples for IgG and IgM samples for IgG.

|     | Sensitivity | Specificity | Accuracy |
|-----|-------------|-------------|----------|
| IgG | 100%        | 98.5%       | 99.2%    |
| IgM | 91.5%       | 98.5%       | 97.5%    |

- A predictability study conducted with a human population showed that 100% of participants obtained a correct and interpretable result.  
- A reliability study confirmed that 98.1% of the different types of results were obtained correctly.

## INTERPRETATION

**NEGATIVE**

**POSITIVE**

PUT YOUR TEST HERE

**How to read the test results**  
The test result is read by looking at the window. The window has two lines. The control line (C) and the test lines (T1 and T2). The test lines (T1 and T2) are only visible if you are infected with the virus. The control line (C) is always visible. The test lines (T1 and T2) are only visible if you are infected with the virus. The test lines (T1 and T2) are only visible if you are infected with the virus. The test lines (T1 and T2) are only visible if you are infected with the virus.

**The result is POSITIVE if 2 or 3 lines are visible in the window.** The control line (C) and the test lines (T1 and T2) are visible. The test lines (T1 and T2) are only visible if you are infected with the virus. The control line (C) is always visible. The test lines (T1 and T2) are only visible if you are infected with the virus. The test lines (T1 and T2) are only visible if you are infected with the virus.

The test is valid in the control zone (C) even if there is a band in the IgG and/or IgM zone. Exacto COVID-19 self-test is **INVALID** if you do not perform a test.

- Do not interpret the Exacto COVID-19 self-test if it is not used in the round (EXACTO) self-test and the Exacto COVID-19 self-test. Do not use the Exacto COVID-19 self-test. Do not use the Exacto COVID-19 self-test. Do not use the Exacto COVID-19 self-test.
- Subsequent to your test and its components, please refer to the rules in force in your country.

Do not forget to watch the Performance self-test on YouTube. The address is: [www.exacto.com](#)

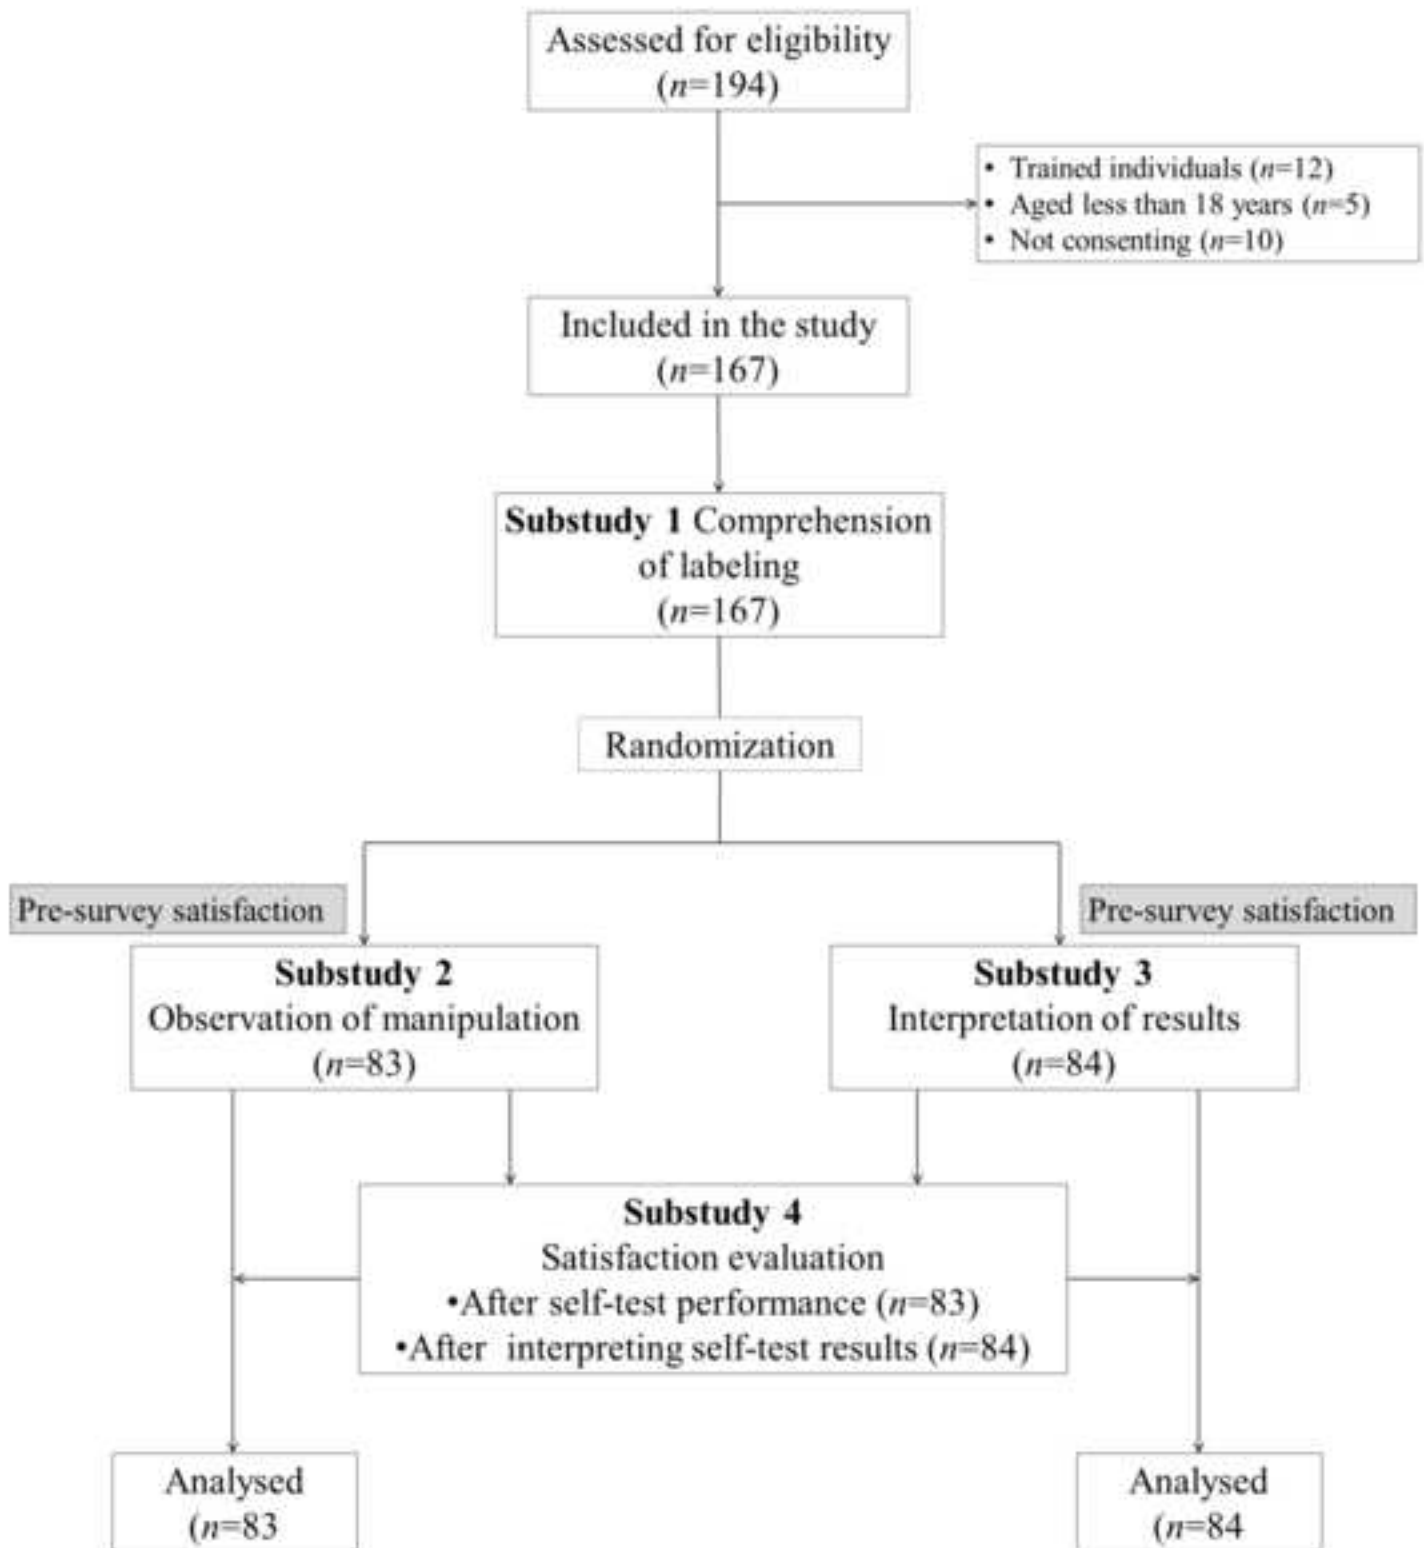

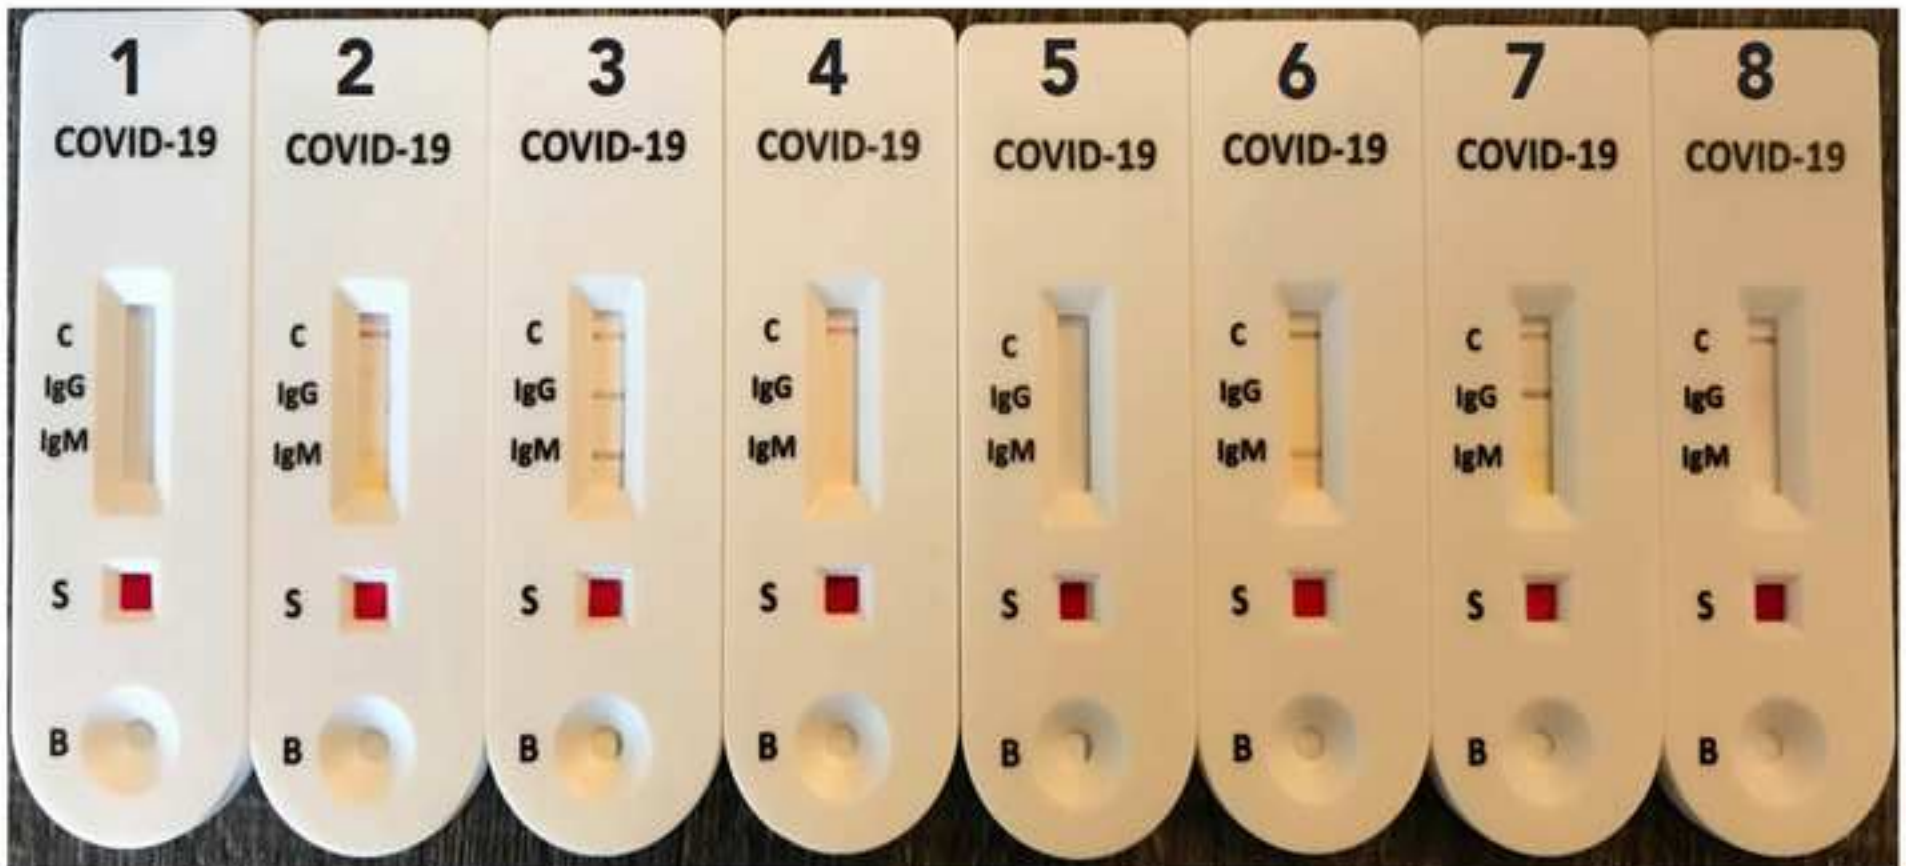

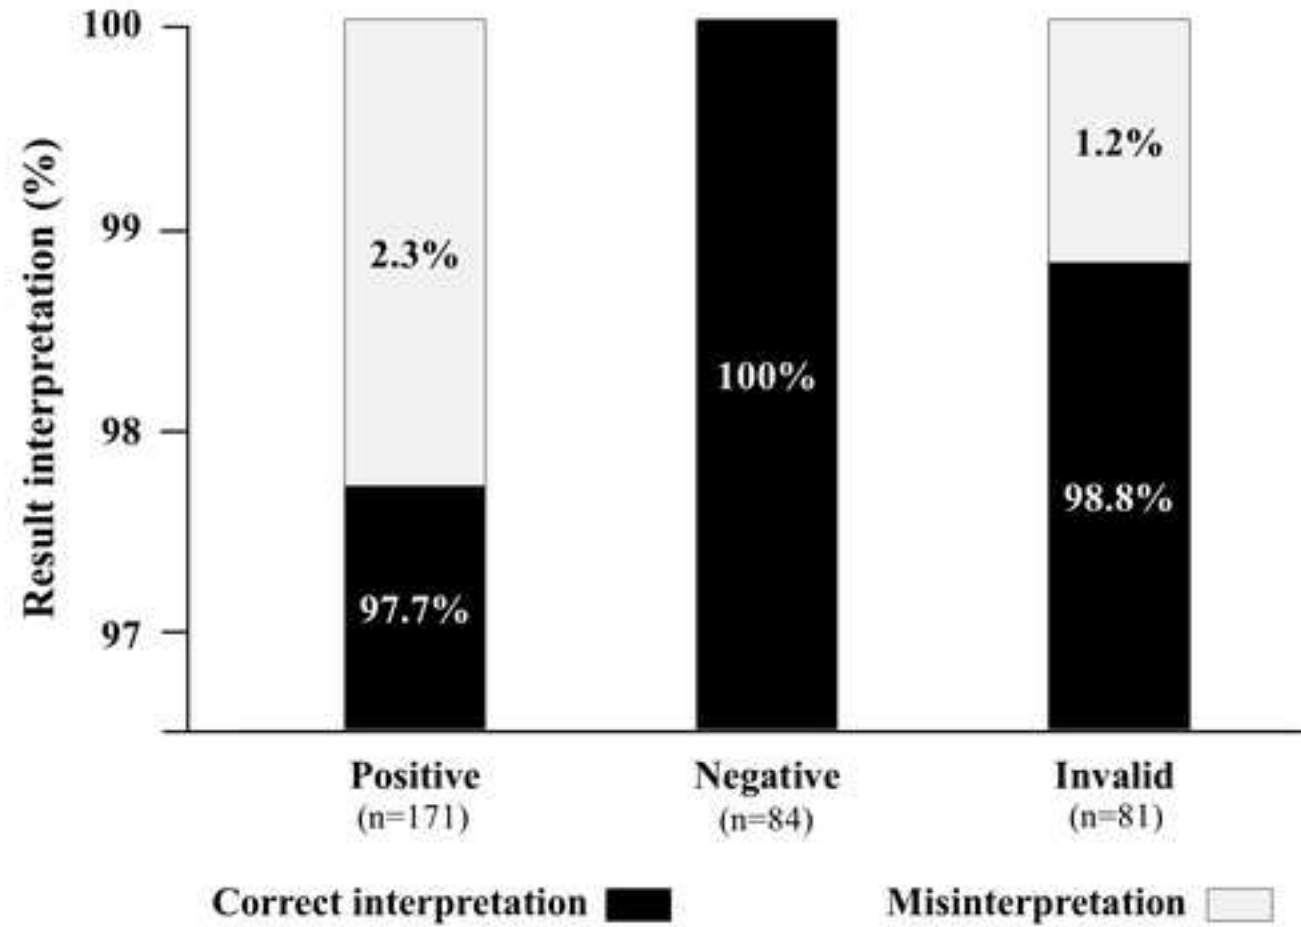

Supplement: pone.0240779.s005.pdf [file pone.0240779.s005.pdf]
