# Supplementary material for: Capillary whole-blood IgG-IgM COVID-19 self-test as a serological screening tool for SARS-CoV-2 infection adapted to the general public
Source: PubMed Central journal article supplement (PMC7561138; doi:10.1371/journal.pone.0240779), 2020-10-15
Supplement: pone.0240779.s007.pdf [file pone.0240779.s007.pdf]

# PLOS ONE

## Capillary whole-blood IgG-IgM COVID-19 self-test as a serological screening tool for SARS-CoV-2 infection adapted to the general public --Manuscript Draft--

|                               |                                                                                                                                                                                                                                                                                                                                                                                                                                                                                                                                                                                                                                                                                                                                                                                                                                                                                                                                                                                                                                                                                                                                                                                                                                                                                                                                                                                                                                                                                                                                                                                                                                                                                                                                                                                                                                                                                                                                                                                                                                                                                         |
|-------------------------------|-----------------------------------------------------------------------------------------------------------------------------------------------------------------------------------------------------------------------------------------------------------------------------------------------------------------------------------------------------------------------------------------------------------------------------------------------------------------------------------------------------------------------------------------------------------------------------------------------------------------------------------------------------------------------------------------------------------------------------------------------------------------------------------------------------------------------------------------------------------------------------------------------------------------------------------------------------------------------------------------------------------------------------------------------------------------------------------------------------------------------------------------------------------------------------------------------------------------------------------------------------------------------------------------------------------------------------------------------------------------------------------------------------------------------------------------------------------------------------------------------------------------------------------------------------------------------------------------------------------------------------------------------------------------------------------------------------------------------------------------------------------------------------------------------------------------------------------------------------------------------------------------------------------------------------------------------------------------------------------------------------------------------------------------------------------------------------------------|
| <b>Manuscript Number:</b>     | PONE-D-20-20619R1                                                                                                                                                                                                                                                                                                                                                                                                                                                                                                                                                                                                                                                                                                                                                                                                                                                                                                                                                                                                                                                                                                                                                                                                                                                                                                                                                                                                                                                                                                                                                                                                                                                                                                                                                                                                                                                                                                                                                                                                                                                                       |
| <b>Article Type:</b>          | Research Article                                                                                                                                                                                                                                                                                                                                                                                                                                                                                                                                                                                                                                                                                                                                                                                                                                                                                                                                                                                                                                                                                                                                                                                                                                                                                                                                                                                                                                                                                                                                                                                                                                                                                                                                                                                                                                                                                                                                                                                                                                                                        |
| <b>Full Title:</b>            | Capillary whole-blood IgG-IgM COVID-19 self-test as a serological screening tool for SARS-CoV-2 infection adapted to the general public                                                                                                                                                                                                                                                                                                                                                                                                                                                                                                                                                                                                                                                                                                                                                                                                                                                                                                                                                                                                                                                                                                                                                                                                                                                                                                                                                                                                                                                                                                                                                                                                                                                                                                                                                                                                                                                                                                                                                 |
| <b>Short Title:</b>           | Practicability of COVID-19 self-test                                                                                                                                                                                                                                                                                                                                                                                                                                                                                                                                                                                                                                                                                                                                                                                                                                                                                                                                                                                                                                                                                                                                                                                                                                                                                                                                                                                                                                                                                                                                                                                                                                                                                                                                                                                                                                                                                                                                                                                                                                                    |
| <b>Corresponding Author:</b>  | Laurent Bélec, Ph.D., M.D.<br>Hopital Europeen Georges Pompidou<br>FRANCE                                                                                                                                                                                                                                                                                                                                                                                                                                                                                                                                                                                                                                                                                                                                                                                                                                                                                                                                                                                                                                                                                                                                                                                                                                                                                                                                                                                                                                                                                                                                                                                                                                                                                                                                                                                                                                                                                                                                                                                                               |
| <b>Keywords:</b>              | SARS-CoV-2; COVID-19, Serology; IgG; IgM; Rapid Diagnostic Test; Self-testing; Practicability; France                                                                                                                                                                                                                                                                                                                                                                                                                                                                                                                                                                                                                                                                                                                                                                                                                                                                                                                                                                                                                                                                                                                                                                                                                                                                                                                                                                                                                                                                                                                                                                                                                                                                                                                                                                                                                                                                                                                                                                                   |
| <b>Abstract:</b>              | <p>The practicability of a prototype capillary whole-blood IgG-IgM COVID-19 self-test (Exacto © COVID-19 self-test, Biosynex Swiss SA, Freiburg, Switzerland) as a serological screening tool for SARS-CoV-2 infection adapted to the general public was evaluated in a cross-sectional, general adult population study performed between April and May 2020 in Strasbourg, France, consisting of face-to-face, paper-based, semi-structured, and self-administrated questionnaires. Practicability was defined as the correct use of the self-test and the correct interpretation of the result. The correct use of self-test was conditioned by the presence of the control band after 15-min of migration. The correct interpretation of the tests was defined by the percent agreement between the tests results read and interpret by the participants compared to the expected results coded by the numbers and verified by trained observers. A total of 167 participants (52.7% female; median age, 35.8 years; 82% with post-graduate level) were enrolled, including 83 and 84 for usability and test results interpretation substudies, respectively. All participants (100%; 95% CI: 95.6–100) correctly used the self-test. However, 12 (14.5%; 95% CI: 8.5–23.6) asked for verbal help. The percent agreement between the tests results read and interpret by the participants compared to the expected results was 98.5% (95% CI: 96.5–99.4) . However, misinterpretation occurred in only 2.3% of positive and 1.2% of invalid test results. Finally, all (100%) participants found that performing the COVID-19 self-test was easy; and 98.8% found the interpretation of the self-test results easy. Taken together, these pilot observations demonstrated for the first-time, high practicability and satisfaction of COVID-19 self-testing for serological IgG and IgM immune status, indicating its potential for use by the general public to complete the arsenal of available SARS-CoV-2 serological assays in the urgent context of the COVID-19 epidemic.</p> |
| <b>Order of Authors:</b>      | <p>Serge Tonen-Wolyec</p> <p>Raphael Dupont</p> <p>Salomon Batina-Agasa</p> <p>Marie Pierre Hayette</p> <p>Laurent Bélec</p>                                                                                                                                                                                                                                                                                                                                                                                                                                                                                                                                                                                                                                                                                                                                                                                                                                                                                                                                                                                                                                                                                                                                                                                                                                                                                                                                                                                                                                                                                                                                                                                                                                                                                                                                                                                                                                                                                                                                                            |
| <b>Response to Reviewers:</b> | <p>Responses to journal requirements and to Reviewers</p> <p>Journal Requirements:</p> <p>When submitting your revision, we need you to address these additional requirements.</p> <p>1. Please ensure that your manuscript meets PLOS ONE's style requirements, including those for file naming. The PLOS ONE style templates can be found at <a href="https://clicktime.symantec.com/3Ab2UDzwphFJFJ5wTH8Dthe6H2?u=https%3A%2F%2Fjournals.plos.org%2Fplosone%2Fs%2Ffile%3Fid%3DwjVg%2FPLOOne_formatting_sample_main_body.pdf">https://clicktime.symantec.com/3Ab2UDzwphFJFJ5wTH8Dthe6H2?u=https%3A%2F%2Fjournals.plos.org%2Fplosone%2Fs%2Ffile%3Fid%3DwjVg%2FPLOOne_formatting_sample_main_body.pdf</a> and <a href="https://clicktime.symantec.com/3J1bpueumkNeCCUwpeXGyX66H2?u=https%3A%2F">https://clicktime.symantec.com/3J1bpueumkNeCCUwpeXGyX66H2?u=https%3A%2F</a></p>                                                                                                                                                                                                                                                                                                                                                                                                                                                                                                                                                                                                                                                                                                                                                                                                                                                                                                                                                                                                                                                                                                                                                                                                          |

%2Fjournals.plos.org%2Fplosone%2Fs%2Ffile%3Fid%3Dba62%2FPLOOne\_formatting\_sample\_title\_authors\_affiliations.pdf

Our answer: We have checked that the manuscript meets the PLOS ONE'S requirements, including file names and affiliations.

2. Please include additional information regarding the survey or questionnaire used in the study and ensure that you have provided sufficient details that others could replicate the analyses.

For instance, if you developed a questionnaire as part of this study and it is not under a copyright more restrictive than CC-BY, please include a copy, in both the original language and English, as Supporting Information.

Our answer: As requested, the study questionnaires in French (original language) as well as in English have been uploaded in the submission system, as supporting information.

3. Thank you for stating the following in the Acknowledgments Section of your manuscript:

'Dr. Serge Tonen-Wolyec was recipient of ERASMUS+ program between the University of Kisangani, Democratic Republic of the Congo, and the University of Liège, Belgium.'

We note that you have provided funding information that is not currently declared in your Funding Statement. However, funding information should not appear in the Acknowledgments section or other areas of your manuscript. We will only publish funding information present in the Funding Statement section of the online submission form.

a. Please remove any funding-related text from the manuscript and let us know how you would like to update your Funding Statement. Currently, your Funding Statement reads as follows:

'The authors received no specific funding for this work.'

Our answer: In order to acknowledge the journal requirement, we have removed any funding-related text from the manuscript and we have updated our Funding Statement as follows: "This work was partly supported by Biosynex SA. The funders played a role in providing the prototype SARS-CoV-2 test for self-test (Exacto® COVID-19 self-test, Biosynex Swiss SA) and data collection. The study design, analysis, decision to publish, and preparation of the manuscript were not sponsored. Biosynex SA also provided support for this study in the form of salary for Dr. Raphael Dupont. The specific role of this author is articulated in the 'author contributions' section. Dr. Serge Tonen-Wolyec was recipient of ERASMUS+ program between the University of Kisangani, Democratic Republic of the Congo, and the University of Liège, Belgium. There was no additional external funding received for this study."

b. Please include your amended statements within your cover letter; we will change the online submission form on your behalf.

Our answer: We have included our amended Funding statement within our cover letter.

4. Thank you for stating the following in the Competing Interests section:

'The authors have declared that no competing interests exist.'

We note that one or more of the authors are employed by a commercial company: BioSynex

a. Please provide an amended Funding Statement declaring this commercial affiliation, as well as a statement regarding the Role of Funders in your study. If the funding organization did not play a role in the study design, data collection and analysis, decision to publish, or preparation of the manuscript and only provided financial support in the form of authors' salaries and/or research materials, please review your statements relating to the author contributions, and ensure you have specifically and accurately indicated the role(s) that these authors had in your study. You can update author roles in the Author Contributions section of the online submission form.

Please also include the following statement within your amended Funding Statement. "The funder provided support in the form of salaries for authors [insert relevant initials], but did not have any additional role in the study design, data collection and analysis, decision to publish, or preparation of the manuscript. The specific roles of these authors are articulated in the 'author contributions' section."

If your commercial affiliation did play a role in your study, please state and explain this role within your updated Funding Statement.

b. Please also provide an updated Competing Interests Statement declaring this commercial affiliation along with any other relevant declarations relating to employment, consultancy, patents, products in development, or marketed products,

etc.

Within your Competing Interests Statement, please confirm that this commercial affiliation does not alter your adherence to all PLOS ONE policies on sharing data and materials by including the following statement: "This does not alter our adherence to PLOS ONE policies on sharing data and materials." (as detailed online in our guide for authors <http://journals.plos.org/plosone/s/competing-interests>) . If this adherence statement is not accurate and there are restrictions on sharing of data and/or materials, please state these. Please note that we cannot proceed with consideration of your article until this information has been declared.

c. Please include both an updated Funding Statement and Competing Interests Statement in your cover letter. We will change the online submission form on your behalf.

Please know it is PLOS ONE policy for corresponding authors to declare, on behalf of all authors, all potential competing interests for the purposes of transparency. PLOS defines a competing interest as anything that interferes with, or could reasonably be perceived as interfering with, the full and objective presentation, peer review, editorial decision-making, or publication of research or non-research articles submitted to one of the journals. Competing interests can be financial or non-financial, professional, or personal. Competing interests can arise in relationship to an organization or another person. Please follow this link to our website for more details on competing interests: <http://journals.plos.org/plosone/s/competing-interests>

Our answer: The authors have read the journal's policy and have the following competing interests: Dr. Raphael Dupont is a paid employee of Biosynex SA. The authors would like to declare the following patents/patent applications associated with this research: [https://bases-marques.inpi.fr/Typo3\\_INPI\\_Marques/ajoutListe?page=1&idObjet=1484785\\_202032\\_tmint&scroll=462.4761962890625](https://bases-marques.inpi.fr/Typo3_INPI_Marques/ajoutListe?page=1&idObjet=1484785_202032_tmint&scroll=462.4761962890625). This does not alter our adherence to PLOS ONE policies on sharing data and materials. We have added this highlighting in our cover letter and online submission.

5. PLOS requires an ORCID iD for the corresponding author in Editorial Manager on papers submitted after December 6th, 2016. Please ensure that you have an ORCID iD and that it is validated in Editorial Manager. To do this, go to 'Update my Information' (in the upper left-hand corner of the main menu), and click on the Fetch/Validate link next to the ORCID field. This will take you to the ORCID site and allow you to create a new iD or authenticate a pre-existing iD in Editorial Manager. Please see the following video for instructions on linking an ORCID iD to your Editorial Manager account:

[https://clicktime.symantec.com/3QJAoi3RwJ4rwEt9UViL8wS6H2?u=https%3A%2F%2Fwww.youtube.com%2Fwatch%3Fv%3D\\_xcclfvvtxQ](https://clicktime.symantec.com/3QJAoi3RwJ4rwEt9UViL8wS6H2?u=https%3A%2F%2Fwww.youtube.com%2Fwatch%3Fv%3D_xcclfvvtxQ)

Our answer: We have added a validated ORCID iD (<https://orcid.org/0000-0002-5001-0405>) of the corresponding author in Editorial Manager.

Reviewers' comments:

Reviewer's Responses to Questions

Comments to the Author

1. Is the manuscript technically sound, and do the data support the conclusions?  
The manuscript must describe a technically sound piece of scientific research with data that supports the conclusions. Experiments must have been conducted rigorously, with appropriate controls, replication, and sample sizes. The conclusions must be drawn appropriately based on the data presented.

Reviewer #1: Partly

Reviewer #2: Partly

Our answer: We thank the reviewers for their nice comments on our work. However, in order to acknowledge the comments raised by referees, we have made corrections thorough the manuscript; therefore, we hope that our revised manuscript is more technically sound.

2. Has the statistical analysis been performed appropriately and rigorously?

Reviewer #1: Yes

Reviewer #2: Yes

Our answer: We thank the reviewers for their nice comments on our work.

3. Have the authors made all data underlying the findings in their manuscript fully available?

The PLOS Data policy requires authors to make all data underlying the findings described in their manuscript fully available without restriction, with rare exception (please refer to the Data Availability Statement in the manuscript PDF file). The data should be provided as part of the manuscript or its supporting information, or deposited to a public repository. For example, in addition to summary statistics, the data points behind means, medians and variance measures should be available. If there are restrictions on publicly sharing data—e.g. participant privacy or use of data from a third party—those must be specified.

Reviewer #1: Yes

Reviewer #2: Yes

Our answer: We thank the reviewers for their nice comments on our work.

4. Is the manuscript presented in an intelligible fashion and written in standard English?

PLOS ONE does not copyedit accepted manuscripts, so the language in submitted articles must be clear, correct, and unambiguous. Any typographical or grammatical errors should be corrected at revision, so please note any specific errors here.

Reviewer #1: No

Reviewer #2: Yes

Our answer: In order to acknowledge the comments raised by Reviewer # 1, we have corrected words and grammar as suggested by Referee. We hope that our revised manuscript is presented in an intelligible fashion and written in standard American English.

5. Review Comments to the Author

Please use the space provided to explain your answers to the questions above. You may also include additional comments for the author, including concerns about dual publication, research ethics, or publication ethics. (Please upload your review as an attachment if it exceeds 20,000 characters)

Answer to reviewer #1

This study is potentially one of several necessary but not sufficient steps towards translation to practice. However, the discussion must be made much more conservative. The extensive speculation on the role of home serology testing could create safety problems and is of major concern.

Our answer: The remark of the reviewer is right. To acknowledge the reviewer's concern, we have completed the Strengths and limitations section by adding the following paragraph: "The role of the COVID-19 self-test in fighting the epidemic, caring for infected people and preventing risk of transmission is not yet known. The possible risk of adverse effects of the COVID-19 self-test should not be underestimated, such as a pseudo-insurance of immunity or non-contagiousness. Furthermore, there is limited understanding of adult public acceptability and usability of rapid diagnostic tests in the home setting, as most are currently designed as professional use to be carried out by healthcare professionals. It will of course be necessary to precisely assess all these potential perverse effects. However, the place of the COVID-19 self-test could simply be a complementary public health tool. Indeed, testing a large number of individuals for serological survey for example would be impractical if a blood sample is required for SARS-CoV-2 serologic testing in a laboratory. The solution to use self-sampling and self-testing with participants reporting their results to the clinicians or epidemiologists has been recently reported in a nationally representative serosurvey of SARS-CoV-2 in adults in England, demonstrating its full feasibility [Atchison et al., 2020]."

Atchison C, Pristerà P, Cooper E, Papageorgiou V, Redd R, Piggan M, Flower B, Fontana G, Satkunarajah S, Ashrafian H, Lawrence-Jones A, Naar L, Chigwende J, Gibbard S, Riley S, Darzi A, Elliott P, Ashby D, Barclay W, Cooke GS, Ward H. Usability and acceptability of home-based self-testing for SARS-CoV-2 antibodies for population surveillance. *Clin Infect Dis*. 2020 Aug 12;ciaa1178. doi: 10.1093/cid/ciaa1178.

Highlight [page 8]: 98.5% (95% CI: 96.5–99.4) test results were correctly interpreted, while misinterpretation occurred in only...

Note [page 8]: L47. What is the definition of the correct interpretation of the test?  
Our answer: Since the expected results were known from the code numbers of the eight standardized tests, the correct interpretation of the tests was defined by the percent agreement between the tests results read and interpreted by the participants compared to the expected results coded by the numbers and verified by observers. Thus, misinterpretation corresponded to the percent disagreement between the test results read and interpret by the participants and the expected results coded by the numbers. We have added these clarifications in the abstract and the body of the text.

Note [page 10]: L88 Change 'as' to 'as well as'

Highlight [page 10]: HIV self-testing has demonstrated high acceptability with very convenient usability in various adolescent and adult profane populations from developed as resources- constrained settings [17-21].

Note [page 10]: L88 profane? Don't think you mean this- suggest remove this word.  
Our answer: We have corrected the sentence, as suggested.

Highlight [page 11]: The BIOSYNEX® COVID-19 BSS (IgG/IgM) (Biosynex Swiss SA) showed sensitivity of 97.4% and specificity of 100%, demonstrating high analytical performances allowing convenient management of suspected on-going and past-infections.

Note [page 11]: L 119: Have these results been peer reviewed and published elsewhere? If so please provide reference? Why not publish the this study and the performance characteristics of the test in the same paper? They ideally need to be assessed together.

Our answer: While the purpose of our study was not to assess the virological analytical performances of the BIOSYNEX® COVID-19 BSS (IgG/IgM) (Biosynex Swiss SA), this rapid diagnostic test has been fully recommended for both SARS-CoV-2-specific IgG and IgM detection by the French Ministry of Health (<https://covid-19.sante.gouv.fr/tests>. ; last access 25 August 2020), following an official report from the National Reference Center for Respiratory Viruses [Centre National de Référence Virus des infection respiratoires (dont la grippe)], Institut Pasteur, Paris. We have added this information in the text.

Highlight [page 11]: The online instruction in the video for use was available online from Youtube [24].

Note [page 11]: When the QR code on Figure 1 is scanned it says the video has been taken down. Please provide the video or QR code. Ideally the video could be permanently attached to this paper by the journal rather than relying on a Youtube video that could be taken down again.

Note [page 12]: 132 See latter suggestions about moving full instructions to supplementary materials and using just top half of interpretation panel as Fig 1. Legend needs to state that this was the exact instructions provided to the subjects in this study in both legends.

Our answer: In order to acknowledge the comments raised by Reviewer # 1, we have moved the full instruction for use to supplementary materials. Furthermore, we have provided the video instruction as its supporting information file.

Note [page 12]: L 134: simplify this phrase

Highlight [page 12]: of the Exacto® COVID-19 self-test (Biosynex Swiss SA) is a cross-sectional study performed between April and May 2020 by home-based recruitment of adult volunteers using a door-to- door community approach, in 15 neighborhoods of Strasbourg and its suburbs,...

Our answer: We have simplified this sentence as suggested.

Note [page 12]: How were these neighborhoods selected? Was there a wide range of socio-economic and educaional status and was this representative of developed countries in Northern Europe? Will need a discussion on how generalizable are these results likely to be.

Our answer: Due to the limited movement during the lockdown period, the choice of these neighborhoods and its suburbs was based on their easy accessibility and their

high prevalence of reported cases of SARS-CoV-2 infection. We have added this sentence in the “Study design and recruitment of participants” section for more highlighting.

Note [page 14]: L189: Change appeal for to provide

Highlight [page 14]: The observer was responsible for recording the respect or not of each step, appeal for verbal assistance (mimicking telephone support), difficulty, and errors on a standardized sheet.

Our answer: We have changed the words as suggested.

Note [page 14]: L196: change proposed to provided

Highlight [page 14]: In a private setting supervised by an observer, eight standardized test results including four positive tests (one weak positive for IgM, one clearly positive for IgM, one clearly positive for IgG but weak positive for IgM, and one clearly positive for IgM and IgG), two negative tests, and two invalid tests were proposed to the participants for interpretation after successive...

Our answer: We have changed the words as suggested.

Note [page 14]: L196: delete successive

Note [page 14]: L201- 202: suggest change No to #

Highlight [page 14]: Panel of 8 Exacto® COVID-19 self-test (Biosynex Swiss SA) cassettes, including 4 positive tests (n°2, n°3, n°6 and n°7), 2 negative tests (n°2 and n°7) and 2 invalid tests (n°1 and n°5).

Our answer: We have changed the words as suggested.

Note [page 14]: L202: change successively to randomly

Highlight [page 14]: Each volunteer successively drew 4 tests among a panel of 8 and interpreted them with the help of the reading and interpretation scale.

Our answer: We have changed the words as suggested.

Note [page 15]: L228: change and to or

Highlight [page 15]: excluded because they were trained (n=12), less than 18 years old (n=5), and not consenting (n=10).

Our answer: We have changed the words as suggested.

Note [page 18]: L277: delete HIV

Highlight [page 18]: Overall, the mean time of HIV self-test performance (since the opening of the box until the migration step) was...

Our answer: It was a mistake, we have deleted it.

Note [page 19]: L293: delete successive- not clear what this means

Highlight [page 19]: COVID-19 self-test results after successive random selection of four tests from a panel of eight standardized tests.

Our answer: We have deleted it.

Note [page 20]: L308: would be interesting to know if there were any differences in the results from substudy 4 for those previously in subsidy 2 versus 3.

Highlight [page 20]: Substudy 4.

Our answer: We did not assess such comparisons.

Note [page 22]: L349 Europeans of high educational attainment

Highlight [page 22]: Finally, our observations lay the foundations for the potential large-scale use of COVID-19 self-test in lay adults, at least Europeans, to complete the arsenal of available serological tests used to assess the immune status vis-a-vis



SARS-CoV-2.

Our answer: We thank the reviewer for this clarification, which we have added to the text.

Note [page 23]: L 376: ..error, however numbers in this group were small.

Highlight [page 23]: In the present series, all participants using the video instructions did not need any help and used the pipette without any difficulty or error.

Our answer: We have added this precision related to the small sample size in this discussion as follows: "Although a small sample size of participants used the video instructions in this series, all of them did not need any help and used the pipette without any difficulty or error."

Note [page 24]: L379: Change delicate to critical

Highlight [page 24]: considered as a delicate step in self-testing [34].

Our answer: We have changed the words as suggested.

Note [page 24]: L395 to 396: Is this really established for SARS-CoV-2 infection. Please provide references

Highlight [page 24]: Furthermore, the presence of IgM alone or with IgG means that the contact with the virus was relatively recent.

Our answer: To acknowledge the reviewer's remarks, we completed as follows: "Furthermore, according to the kinetic profile of the systemic humoral response against SARS-CoV-2 and the lifespan of circulating immunoglobulins, the presence of IgM alone or with IgG means that the contact with the virus was relatively recent [37]".

Note [page 24]: L401: Change neuropsychiatric disorders to psychological distress and not psychologically prepared to who has not received pre-test counseling.

Highlight [page 24]: This misinterpretation of positive test results can provide unfortunate consequences such as self-medication or neuro-psychiatric disorders of variable intensity, especially in a person not psychologically prepared [38].

Our answer: We have changed the sentence as suggested.

Note [page 25]: L419: limit the study's power to detect....what?

Highlight [page 25]: Furthermore, the low sample size could reduce the study's power.

Our answer: The low sample size could reduce the study's power to detect a relative difference between groups with high precision.

Note [page 25]: L425: novel rather than original

Highlight [page 25]: During the COVID-19 epidemic, original approaches using individual involvement were proposed in addition to the collective public health approach, and both strategies were furthermore sometimes combined.

Our answer: We have changed the words as suggested.

Note [page 26]: L439: suggest delete ', but this....study"

Highlight [page 26]: It seems obvious that the motivations for carrying out a COVID-19 self-test would be clearly different than those which push to carry out an HIV self-test, but this problematic exceeds the aim of our study.

Our answer: We have deleted the sentence as suggested.

Note [page 26]: L442: change has made too had

Highlight [page 26]: The COVID-19 self-test allows an individual to test himself simply and quickly, without visiting a care structure, with the essential aim of knowing if the person is in the course of infection (presence of specific IgM alone) or has made a past infection (...)

Our answer: We have changed the words as suggested.

Note [page 26]: L443: Need to emphasize that it is not yet known if antibodies are protective and if so how durable this protection is and if antibodies guarantee they cannot infect others. Must emphasize the importance of conveying this to the subjects self-testing and of their need to continue to take precautions to protect themselves and others.

Highlight [page 26]: Thus, COVID-19 self-testing for serological screening could be proposed to identify exposed patients that are presumptively immune to SARS-CoV-2 secondary to ongoing or past-infection and to quantify the prevalence of exposure within a population for epi...

Our answer: To acknowledge these reviewer's remarks, we have added the following sentence: "However, it should be emphasized that the level of protection of seropositivity for SARS-CoV-2 as well as its duration are not known, and even that the presence of specific antibodies does not mean that the person is not contagious, particularly in onset of infection. It will therefore be important to pass this information on to subjects who self-test so that they continue to take precautions to protect themselves and others."

Note [page 26]: L448: "refer.." change to seek confirmatory antibody test by a clinical laboratory and clinical follow-up" Need to comment on the burden this will place on the health care system.

Highlight [page 26]: The instructions for use clearly explains that the lack of reactivity does not eliminate a SARS-CoV-2 infection in progress, and that in the presence of any IgG or IgM reactivities the patient must refer to a health care structure for clinical...

Our answer: We have changed the sentence as suggested, and added that "which could contribute to accentuating tensions in the healthcare system, in particular during epidemic periods".

Note [page 26]: L449: change to It should be emphasized that it is not known if a positive antibody test represents protection and the concept of an "immunological passport" cannot be supported at this time.

Highlight [page 26]: In any case, the presence of reactivities could constitute an "immunological passport" of protection [46,47], because it is not known if anti-SARS-CoV-2 antibodies are protective at this time, although the general assumption is that the presence of antibod...

Our answer: We have deleted the ambiguous sentence: "...because it is not known if anti-SARS-CoV-2 antibodies are protective at this time.....".

Note [page 27]: L454 Change most excitement to interest

Highlight [page 27]: "presumptive immunity" will be determined and used do not exist, this potential use has probably generated the most excitement in the lay public [47].  
Our answer: We have changed the words as suggested.

Note [page 27]: L456-457: delete: "...and would...individuals" No evidence to support his statement.

Highlight [page 27]: In any case, an IgG positive COVID-19 self-test result may indicate recovery of a previous SARS-CoV-2 infection, even asymptomatic or mild, and would allow to take more moderate precautions and also to comfortably interact with other COVID-19-seropositive individuals.

Our answer: We have deleted it as suggested.

Note [page 27]: L459: delete would be hugely beneficial to public health. The is conjecture. Suggest 'is worthy of further study'

Highlight [page 27]: Interestingly, serological home testing could be associated with at-home saliva or swab self-sampling for further SARS-CoV-2 molecular diagnosis, and the widespread use of both home approaches would be hugely beneficial to public health.

Our answer: We have corrected the sentence as suggested.



Note [page 27]: L461: should consider themselves potentially infected and self-isolate until the results of clinical testing for the virus is known.

Highlight [page 27]: Those whom the viral test indicates an active SARS-CoV-2 infection (including silent carriers and patients with early or mild symptoms) will be able to take informed actions, such as self-isolation.

Our answer: We agree with the reviewer. We have changed “patients” by “individuals”.

Note [page 27]: L465: Change ‘would allow’ to ‘may facilitate’. All of this discussion is too much conjecture and should be toned down.

Highlight [page 27]: Importantly, a confirmed population of “recovered” individuals would allow many to return to work, lead to partial lifting of “stay

Our answer: We have corrected the sentence as suggested.

Note [page 27]: L451: change will to may and indicate how this could be study to support such policies. Discuss how cost-effectiveness would have to be studies.

Highlight [page 27]: Removing financial barriers to self-testing by making publicly-funded tests available free to the entire population will help maximize rapid implementation and help COVID-19-affected country to recover and get back to work.

Our answer: We have deleted this ambiguous sentence.

Note [page 27]: L476: change the general public to ‘by at least some groups with high levels of education.

Highlight [page 27]: Our features demonstrate that COVID-19 self-testing for serological immune status assessment is highly feasible with potential for use by the general public.

Our answer: We have changed the sentence as suggested.

Note [page 27]: L477: change will to may

Highlight [page 27]: If deployed wisely, it will be complementary to other serological screening tools and

Our answer: We have changed the word as suggested.

Note [page 28]: L478: change ‘offer an immediate and easy solution for’ to facilitate uptake of SARS-CoV-2 serology and delete rest of sentence.

Highlight [page 28]: could offer an immediate and easy solution for SARS-CoV-2 serology, especially during recovery or de-confinement periods.

Our answer: We have changed the sentence as suggested.

Note [page 33]: Figure 1. Impractical to include the entire instruction in the main body of the paper. It should be moved to supplementary materials. The top half of the interpretation panel with an appropriate legend would be more appropriate. Given this is the peer reviewed study examining the issue of interpretation the comment under performance about the 98.5% correct interpretation should be removed. Also the reference to support the performance characteristics of the test shown above that statement needs to be provided.

Highlight [page 34]: Click here to access/download;Figure;Fig...

None of these links worked on this version.

Our answer: As answered above, we have moved the full instruction for use to supplementary materials. And we have provided the video instruction as its supporting information file. However, we have added a Section A to the former Figure 3 (considered as a Section B) to present the interpretation of the results. Thus, this new figure is entitled Fig 2 in the revised version of our manuscript with legend written as follows: “Fig 2. Interpretation of self-test results. A. The self-test result was interpreted as negative when a Control line (C) was present and readable and the “IgG” and “IgM” lines were absent. It was positive when a “C” and “IgM” (clearly or poorly readable) (case 1), or “C” and “IgG”, or “C”, “IgM” (clearly or poorly readable), and “IgG” lines were present. Finally, it was invalid when the “C” line was absent regardless of the

presence or absence of the “IgG” and/or “IgM” line. B. Panel of 8 Exacto® COVID-19 self-test (Biosynex Swiss SA) cassettes, including 4 positive tests (#2, #3, #6 and #7), 2 negative tests (#4 and #8) and 2 invalid tests (#1 and #5). The #2 and #37 are weakly positive for IgM. Each volunteer randomly drew 4 tests among a panel of 8 and interpreted them with the help of the reading and interpretation scale. The observer noted the number of the drawn test and the result given by the participant”. Concerning the interpretation of results, since the expected results were known from the code numbers of the eight standardized tests, the correct interpretation of the tests was defined by the percent agreement between the tests results read and interpret by the participants compared to the expected results coded by the numbers and verified by observers. Thus, misinterpretation corresponded to the percent disagreement between the test results read and interpret by the participants and the expected results coded by the numbers. We have added these clarifications in the abstract and the body of the text.

Finally, the virological analytical performances characteristic of the evaluated self-test are provided in the Material and methods section, in the Prototype SARS-CoV-2 test for self-testing.

Answer to reviewer #2

The authors report on the practicability of a prototype capillary whole-blood IgG-IgM COVID-19 self-test (Exacto COVID-19 self test, Biosynex Swiss, SA, Freiburg, Switzerland) as a serological screening tool for SARS-COV-2 infection adapted to the general public. They performed their evaluation of this test using a cross sectional, general adult population study between April and May 2020 in Strasbourg, France. The study design consisted of face-to-face, paper-based, semi-structured, and self administrated questionnaires. The study enrolled 167 participants of which 82% had a post-graduate level of education. The study evaluated the participants ability to use the test in a number of different testing settings. The authors conclude that 100% of the participants found that performing the self test was easy and 98% found that the interpretation of the self-test results are easy.

Our answer: We thank the reviewer for this perfect summary of our study.

While this study is very interesting and brings forward an important POC / self-administered SARS-COV-2 serological assay the authors failed to bench mark the antibody status to a gold standard lab based assay. The absence of this weakens their initial pilot findings. Does it bring value if people can follow directions and get a result if the test does not corelate highly to what would be considered a typical bench mark to an assay performed in the laboratory under a clinical standard? The absence of comparative data is a major flaw in the study design.

Our answer: We thank the reviewer for this pertinent remark. However, the objective of this survey was to assess the ability of lay persons to perform or interpret a serological test for SARS-CoV-2 immunochromatography. It was not intended to conduct a self-test performance study as such a study would require a large enough sample size of positive individuals to properly estimate the sensitivity of the self-test. Although this survey was carried out during the epidemic period in France, it should be noted that at that time, only confirmatory molecular testing using RT-PCR was recommended for suspect cases according to the recommendations of the French government to avoid wastage of reagents. Reference serological testing for IgG antibodies to SARS-CoV-2 was only progressively implemented in France during the study period, to be only available at the end of May, after the beginning of the deconfinement. While the purpose of our study was not to assess the virological analytical performances of the BIOSYNEX® COVID-19 BSS (IgG/IgM) (Biosynex Swiss SA), this rapid diagnostic test has been fully recommended for both SARS-CoV-2-specific IgG and IgM detection by the French Ministry of Health (<https://covid-19.sante.gouv.fr/tests>. ; last access 25 August 2020), following an official report from the National Reference Center for Respiratory Viruses [Centre National de Référence Virus des infection respiratoires (dont la grippe)], Institut Pasteur, Paris. We have added this information in the text. Furthermore, in order to comply with the requirements of the ethical committee, all persons with a positive serological result were referred to the laboratory for diagnostic confirmation and to the hospital for management. In this study, 11 (13.3%) people had a positive result with the self-test and they were oriented to laboratory for result confirmation. We have added these details in the “substudy 2” sections of Methods and results in the revised manuscript.

**Additional Information:**

| Question                                                                                                                                                                                                                                                                                                                                                                                                                                                                                                                                                                                                                                                                                                                                                                                                                                                                                                                                                                                                                                                                                                                                                                                                                                                                                                                                                                            | Response                                                                                                                                                                                                                                                                                                                                                                                                                                                                                   |
|-------------------------------------------------------------------------------------------------------------------------------------------------------------------------------------------------------------------------------------------------------------------------------------------------------------------------------------------------------------------------------------------------------------------------------------------------------------------------------------------------------------------------------------------------------------------------------------------------------------------------------------------------------------------------------------------------------------------------------------------------------------------------------------------------------------------------------------------------------------------------------------------------------------------------------------------------------------------------------------------------------------------------------------------------------------------------------------------------------------------------------------------------------------------------------------------------------------------------------------------------------------------------------------------------------------------------------------------------------------------------------------|--------------------------------------------------------------------------------------------------------------------------------------------------------------------------------------------------------------------------------------------------------------------------------------------------------------------------------------------------------------------------------------------------------------------------------------------------------------------------------------------|
| <p><b>Financial Disclosure</b></p> <p>Enter a financial disclosure statement that describes the sources of funding for the work included in this submission. Review the <a href="#">submission guidelines</a> for detailed requirements. View published research articles from <a href="#">PLOS ONE</a> for specific examples.</p> <p>This statement is required for submission and <b>will appear in the published article</b> if the submission is accepted. Please make sure it is accurate.</p> <p><b>Unfunded studies</b><br/>Enter: <i>The author(s) received no specific funding for this work.</i></p> <p><b>Funded studies</b><br/>Enter a statement with the following details:</p> <ul style="list-style-type: none"> <li>• Initials of the authors who received each award</li> <li>• Grant numbers awarded to each author</li> <li>• The full name of each funder</li> <li>• URL of each funder website</li> <li>• Did the sponsors or funders play any role in the study design, data collection and analysis, decision to publish, or preparation of the manuscript?</li> <li>• <b>NO</b> - Include this sentence at the end of your statement: <i>The funders had no role in study design, data collection and analysis, decision to publish, or preparation of the manuscript.</i></li> <li>• <b>YES</b> - Specify the role(s) played.</li> </ul> <p>* typeset</p> | <p>This work was partly supported by Biosynex SA. The funders played a role in providing the prototype SARS-CoV-2 test for self-test (Exacto® COVID-19 self-test, Biosynex Swiss SA) and data collection. The study design, analysis, decision to publish, and preparation of the manuscript were not sponsored. Dr. Serge Tonen-Wolyec was recipient of ERASMUS+ program between the University of Kisangani, Democratic Republic of the Congo, and the University of Liège, Belgium.</p> |
| <p><b>Competing Interests</b></p> <p>Use the instructions below to enter a competing interest statement for this submission. On behalf of all authors, disclose any <a href="#">competing interests</a> that could be perceived to bias this work—acknowledging all financial support and any other relevant financial or non-financial competing interests.</p> <p>This statement <b>will appear in the published article</b> if the submission is</p>                                                                                                                                                                                                                                                                                                                                                                                                                                                                                                                                                                                                                                                                                                                                                                                                                                                                                                                             | <p>Dr. Raphael Dupont, who is an employee of Biosynex SA with a salary, had supervised the data collection in Strasbourg, especially during periods of confinement where the movement of individuals was restricted. This does not alter our adherence to PLOS ONE policies on sharing data and materials.</p>                                                                                                                                                                             |

accepted. Please make sure it is accurate. View published research articles from [PLOS ONE](#) for specific examples.

#### **NO authors have competing interests**

Enter: *The authors have declared that no competing interests exist.*

#### **Authors with competing interests**

Enter competing interest details beginning with this statement:

*I have read the journal's policy and the authors of this manuscript have the following competing interests: [insert competing interests here]*

\* typeset

#### **Ethics Statement**

Enter an ethics statement for this submission. This statement is required if the study involved:

- Human participants
- Human specimens or tissue
- Vertebrate animals or cephalopods
- Vertebrate embryos or tissues
- Field research

Write "N/A" if the submission does not require an ethics statement.

General guidance is provided below. Consult the [submission guidelines](#) for detailed instructions. **Make sure that all information entered here is included in the Methods section of the manuscript.**

The study was conducted according to the ethical requirements established by the Declaration of Helsinki. . Ethical approval for this study was obtained from the local scientific committee of Parc de l'Innovation, Strasbourg, France. All participants signed an informed consent form, and were informed of their self-test results, and were referred to care facilities in the event of a positive test.

**Format for specific study types**

**Human Subject Research (involving human participants and/or tissue)**

- Give the name of the institutional review board or ethics committee that approved the study
- Include the approval number and/or a statement indicating approval of this research
- Indicate the form of consent obtained (written/oral) or the reason that consent was not obtained (e.g. the data were analyzed anonymously)

**Animal Research (involving vertebrate animals, embryos or tissues)**

- Provide the name of the Institutional Animal Care and Use Committee (IACUC) or other relevant ethics board that reviewed the study protocol, and indicate whether they approved this research or granted a formal waiver of ethical approval
- Include an approval number if one was obtained
- If the study involved *non-human primates*, add *additional details* about animal welfare and steps taken to ameliorate suffering
- If anesthesia, euthanasia, or any kind of animal sacrifice is part of the study, include briefly which substances and/or methods were applied

**Field Research**

Include the following details if this study involves the collection of plant, animal, or other materials from a natural setting:

- Field permit number
- Name of the institution or relevant body that granted permission

**Data Availability**

Authors are required to make all data underlying the findings described fully available, without restriction, and from the time of publication. PLOS allows rare exceptions to address legal and ethical concerns. See the [PLOS Data Policy](#) and [FAQ](#) for detailed information.

Yes - all data are fully available without restriction

A Data Availability Statement describing where the data can be found is required at submission. Your answers to this question constitute the Data Availability Statement and **will be published in the article**, if accepted.

**Important:** Stating 'data available on request from the author' is not sufficient. If your data are only available upon request, select 'No' for the first question and explain your exceptional situation in the text box.

Do the authors confirm that all data underlying the findings described in their manuscript are fully available without restriction?

**Describe where the data may be found in full sentences. If you are copying our sample text, replace any instances of XXX with the appropriate details.**

- If the data are **held or will be held in a public repository**, include URLs, accession numbers or DOIs. If this information will only be available after acceptance, indicate this by ticking the box below. For example: *All XXX files are available from the XXX database (accession number(s) XXX, XXX).*
- If the data are all contained **within the manuscript and/or Supporting Information files**, enter the following: *All relevant data are within the manuscript and its Supporting Information files.*
- If neither of these applies but you are able to provide **details of access elsewhere**, with or without limitations, please do so. For example:

*Data cannot be shared publicly because of [XXX]. Data are available from the XXX Institutional Data Access / Ethics Committee (contact via XXX) for researchers who meet the criteria for access to confidential data.*

*The data underlying the results presented in the study are available from (include the name of the third party*

All relevant data are within the manuscript and its Supporting Information files.



|                                                                                                                                                                                                                                         |  |
|-----------------------------------------------------------------------------------------------------------------------------------------------------------------------------------------------------------------------------------------|--|
| <p><i>and contact information or URL).</i></p> <ul style="list-style-type: none"><li>• This text is appropriate if the data are owned by a third party and authors do not have permission to share the data.</li></ul> <p>* typeset</p> |  |
| Additional data availability information:                                                                                                                                                                                               |  |

1  
2  
3 **Capillary whole-blood IgG-IgM COVID-19 self-test**  
4 **as a serological screening tool for SARS-CoV-2 infection**  
5 **adapted to the general public**  
6

7  
8 **Serge Tonen-Wolyec<sup>1,2</sup>, Raphaël Dupont<sup>3</sup>, Salomon Batina-Agasa<sup>2</sup>,**  
9 **Marie-Pierre Hayette<sup>4</sup>, Laurent Bélec<sup>5,6,\*</sup>**  
10

11  
12 <sup>1</sup>Ecole Doctorale Régionale D’Afrique Centrale en Infectiologie Tropicale, Franceville, Gabon;

13  
14 <sup>2</sup>Faculty of Medicine and Pharmacy, University of Kisangani, Kisangani, the Democratic Republic of the  
15 Congo;

16  
17 <sup>3</sup>BioSynex, Strasbourg, France;

18  
19 <sup>4</sup>Department of Clinical Microbiology, University Hospital of Liège, Liege, Belgium;

20  
21 <sup>5</sup>Laboratoire de Virologie, Hôpital Européen Georges Pompidou, Assistance Publique-Hôpitaux de Paris,  
22 Paris, France;

23  
24 <sup>6</sup>Université Paris Descartes, Sorbonne Paris Cité, Paris, France.  
25

26  
27  
28 **\*Corresponding author:** [laurent.belec@aphp.fr](mailto:laurent.belec@aphp.fr) (LB)  
29

30  
31  
32 **Author’s contribution.** STW, RD and LB conceived the study. RD performed the experiments,  
33 and collected data. STW analyzed the data and generated the figs. STW, MPH, SBA and LB  
34 supervised this study. All authors wrote and edited the manuscript.  
35

## 36 **Abstract**

37

38 The practicability of a prototype capillary whole-blood IgG-IgM COVID-19 self-test (Exacto<sup>®</sup>  
39 COVID-19 self-test, Biosynex Swiss SA, Freiburg, Switzerland) as a serological screening tool  
40 for SARS-CoV-2 infection adapted to the general public was evaluated in a cross-sectional,  
41 general adult population study performed between April and May 2020 in Strasbourg, France,  
42 consisting of face-to-face, paper-based, semi-structured, and self-administrated questionnaires.  
43 Practicability was defined as the correct use of the self-test and the correct interpretation of the  
44 result. The correct use of self-test was conditioned by the presence of the control band after 15-  
45 min of migration. The correct interpretation of the tests was defined by the percent agreement  
46 between the tests results read and interpret by the participants compared to the expected results  
47 coded by the numbers and verified by trained observers. A total of 167 participants (52.7%  
48 female; median age, 35.8 years; 82% with post-graduate level) were enrolled, including 83 and  
49 84 for usability and test results interpretation substudies, respectively. All participants (100%;  
50 95% CI: 95.6–100) correctly used the self-test. However, 12 (14.5%; 95% CI: 8.5–23.6) asked  
51 for verbal help. The percent agreement between the tests results read and interpret by the  
52 participants compared to the expected results was 98.5% (95% CI: 96.5–99.4) . However,  
53 misinterpretation occurred in only 2.3% of positive and 1.2% of invalid test results. Finally, all  
54 (100%) participants found that performing the COVID-19 self-test was easy; and 98.8% found  
55 the interpretation of the self-test results easy. Taken together, these pilot observations  
56 demonstrated for the first-time, high practicability and satisfaction of COVID-19 self-testing  
57 for serological IgG and IgM immune status, indicating its potential for use by the general public  
58 to complete the arsenal of available SARS-CoV-2 serological assays in the urgent context of  
59 the COVID-19 epidemic.

60

## 61 Introduction

62

63 Severe acute respiratory syndrome coronavirus 2 (SARS-CoV-2), a novel coronavirus  
64 that causes Coronavirus Disease 2019 (COVID-19), started in the Wuhan province, China, in  
65 December 2019, and was declared by the World Health Organization (WHO) as global  
66 pandemic on March 11, 2020 [1-4]. Controlling the outbreak in the community and in hospitals  
67 mainly relied on the availability of highly sensitive and specific nucleic acid amplification-  
68 based molecular testing for SARS-CoV-2 [5,6]. Furthermore, it was demonstrated that  
69 serological testing looking for specific SARS-CoV-2 IgG and/or IgM may be useful for  
70 confirming the diagnosis and care of COVID-19 patients [7-9]. On March 2, 2020, the WHO  
71 recommended serological testing in addition of molecular diagnosis, for investigating on-going  
72 outbreaks as well as for the diagnosis of strongly suspected patients of SARS-CoV-2 infection  
73 with negative RT-PCR [10]. Furthermore, antibody tests for SARS-CoV-2 may constitute one  
74 of the keys to fight the SARS-CoV-2 epidemic, in particular to overcome the de-confinement  
75 period [9]. Seropositivity to SARS-CoV-2 antigens would also allow to identify previously  
76 infected individuals, including asymptomatic patients, a priori considered to be healed and  
77 protected against new reinfection [9].

78 Recently, rapid lateral flow assays for IgG and IgM antibodies produced during the  
79 COVID-19 epidemic have been developed [11]. Several reports have shown that COVID-19  
80 IgG/IgM lateral flow immunoassays may be a reliable tool to diagnose SARS-CoV-2 infection  
81 from 14 days of onset of symptoms [12,13]. In some countries, rapid diagnostic testing for  
82 COVID-19 has been incorporated into the local guidelines for testing asymptomatic contacts of  
83 positive cases, at day 14 of home surveillance [14]. These easy to use IgG-IgM combined tests  
84 allow rapid screening with capillary blood samples. The tests are simple, qualitative, visually  
85 interpretable, and give a result within 10 to 15 minutes. A positive serology allows to determine

86 whether a person has already been infected by SARS-CoV-2. Serologic tests will be needed to  
87 assess the response to vaccine candidates and to map levels of immunity in communities. These  
88 rapid tests could be particularly interesting for developing countries for testing patients at the  
89 bedside or any other locations where laboratory facilities are lacking.

90 HIV self-testing constitutes a novel innovative approach to make testing more  
91 accessible, confidential, and available at non-traditional venues, such as pharmacies and  
92 community venues, as well as in the home, as it offers a discreet, convenient, and empowering  
93 way to test [15,16]. HIV self-testing has demonstrated high acceptability with very convenient  
94 usability in various adolescent and adult populations from developed as well as resources-  
95 constrained settings [17-21].

96 To our knowledge, there is no currently reported experience in the literature about self-  
97 testing for SRAS-CoV-2 infection. Based on our own experience of HIV self-testing evaluation,  
98 we herein aimed at evaluating the practicability of a prototype capillary whole-blood IgG-IgM  
99 COVID-19 self-test as a serological screening tool for SARS-CoV-2 infection adapted to the  
100 general public.

101

## 102 **Material and methods**

103

104 **Prototype SARS-CoV-2 test for self-testing.** The prototype capillary whole-  
105 blood IgG/IgM SARS-CoV-2 self-test (Exacto<sup>®</sup> COVID-19 self-test, Biosynex Swiss SA,  
106 Freiburg, Switzerland) was adapted from the CE IVD-labeled finger-stick whole-blood rapid  
107 diagnostic test for IgG and IgM antibodies against SARS-CoV-2 detection (BIOSYNEX<sup>®</sup>  
108 COVID-19 BSS [IgG/IgM], Biosynex Swiss SA), by re-packaging for individual use with the  
109 addition of seven components placed in a pouch containing the test cassette, diluent vial,  
110 pipette, alcohol wipe, compress, lancet and dressing. The Exacto<sup>®</sup> COVID-19 self-test

111 (Biosynex Swiss SA) consists of visually read, qualitative, *in vitro* lateral flow immunoassays  
112 for the detection of IgG and IgM antibodies to SARS-CoV-2 in human whole blood, serum, or  
113 plasma as an aid in the diagnosis of SARS-COV-2 infection. The targeted protein is the  
114 receptor-binding domain (RBD) of the spike surface protein of SARS-CoV-2. During testing,  
115 the specimen reacts with SARS-CoV-2 antigen-coated particles in the test cassette. The mixture  
116 then migrates upward on the membrane chromatographically by capillary action and reacts with  
117 the anti-human IgG in the IgG test line region or/and with the anti-human IgM in the IgM line  
118 region. The quantity of blood needed to perform the test is 10  $\mu$ L.

119         The analytical performances of the BIOSYNEX<sup>®</sup> COVID-19 BSS (IgG/IgM) (Biosynex  
120 Swiss SA) were evaluated during the COVID-19 epidemic in *Grand Hôpital de l'Est francilien*,  
121 Jossigny, France, using two serum sample panels obtained from patients with COVID-19  
122 confirmed by positive nucleic acid amplification-based diagnosis at least 14 days after  
123 symptoms onset and from patients randomly selected for whom serum samples were collected  
124 before the COVID-19 epidemic (from October 1 to November 30, 2019) (instructions for use  
125 2020). The BIOSYNEX<sup>®</sup> COVID-19 BSS (IgG/IgM) (Biosynex Swiss SA) showed sensitivity  
126 of 97.4% and specificity of 100%, demonstrating high analytical performances allowing  
127 convenient management of suspected on-going and past-infections. Furthermore, this rapid  
128 diagnostic test is recommended for both SARS-CoV-2-specific IgG and IgM detection by the  
129 French Ministry of Health [22], following an official report from the National Reference Center  
130 for Respiratory Viruses [*Centre National de Référence Virus des infection respiratoires (dont*  
131 *la grippe)*], Institut Pasteur, Paris, because the test fulfilled the criteria of the minimal analytical  
132 performances [*i.e.* minimum sensitivity of 90% (or even 95%) and minimum specificity of  
133 98%] of serological tests detecting the antibodies directed against SARS-CoV-2, defined on  
134 April 16, 2020 by the so-called *Haute Autorité de Santé* [23]. The simplified instructions for  
135 use of the Exacto<sup>®</sup> COVID-19 self-test (Biosynex Swiss SA) comprised an easy-to-read leaflet



136 in French and English, in A3 format color printing. As an example, the paper-based and video-  
137 based instructions for use are depicted as S1 and S2 appendix.

138

139 **Study design and recruitment of participants.** The practicability evaluation  
140 of the Exacto® COVID-19 self-test (Biosynex Swiss SA)  cross-sectional study, consisting  
141 of face-to-face, paper-based, semi-structured, and self-administrated questionnaires. This  
142 survey was performed between April and May 2020 by home-based recruitment of adult  
143 volunteers using a door-to-door community approach, in 15 neighborhoods of Strasbourg and  
144 its suburbs, France. Due to the limited movement during the confinement period in France,  
145 especially in the province of Alsace (now “Grand Est”) for which Strasbourg is the capital city,  
146 the choice of these neighborhoods and its suburbs was based on their easy accessibility and  
147 their high prevalence of reported cases of SARS-CoV-2 infection [24].

148 All participants accepted voluntarily to be included. Eligible participants had an age  $\geq$   
149 18 years, wanted to know their SRAS-CoV-2 serology status, were capable to speak and read  
150 in French, and gave their consent to participate in the study. All trained individuals (physicians,  
151 nurses, and biologist) in rapid diagnostic tests were excluded. Informed written consent was  
152 signed by all participants. Ethical approval for this study was obtained from the local scientific  
153 committee of Parc de l’Innovation, Strasbourg, France.

154

155 **Practicability study outcomes.** The practicability evaluation was divided into four  
156 substudies carried out by trained health care professionals, based on previously acquired  
157 experience from WHO recommendations for evaluating the practicability of HIV self-tests  
158 [17,18,25]. Indeed, the practicability was defined as the correct use of the self-test and the  
159 correct interpretation of the result. The correct use of self-test was conditioned by the presence  
160 of the control band after 15-min of migration. The correct interpretation of the tests was defined

161 by the percent agreement between the tests results read and interpret by the participants  
162 compared to the expected results coded by the numbers and verified by trained observers. As  
163 depicted in the Fig 1, all participants were included in substudy 1 concerning the understanding  
164 of labeling, while they were randomized into two groups for substudy 2 concerning  
165 manipulation of the test and substudy 3 evaluating the interpretation of COVID-19 self-test  
166 results, using block randomization of 4. Participants in sub-study 4 were each drawn from the  
167 satisfaction questionnaires for substudies 2 and 3.

168

169 **Fig 1.** Flow chart showing the recruitment of study participants, their randomization, and  
170 affiliation for each substudy.

171

172 **Data collection and procedures.** Paper-based, self-administered, and structured  
173 questionnaires were used to obtain the data on the socio-demographic characteristics, medical  
174 history of study participants, participants' understanding of the instructions for use, and  
175 participants' opinions or levels of satisfaction about the practicability of the Exacto<sup>®</sup> COVID-  
176 19 self-test (Biosynex Swiss SA). All data related to the observation of manipulation and the  
177 interpretation of test results were recorded on the standardized sheets by the observers.

178 **Substudy 1. Comprehension of labeling.** After receiving a brief explanation of  
179 the objectives and conduct of the study, the participants were asked to sign the informed consent  
180 form. In a private setting, the participants had the choice between a paper-based instruction for  
181 use and a video-based instruction for use, which they were asked to read or watch and  
182 understand independently. After their self-declaration of having understood the instruction for  
183 use, the participants were asked to fill a questionnaire to gauge their comprehension. To this  
184 end, 10 questions restating the key information with closed answers (true, false, or don't know)  
185 were asked by the observer on the followings items: 1. Identification of each component of the

186 kit; 2. Manipulation of blood sampling device; 3. Diluent deposit; 4. Possession of a timer; 5.  
187 Interpretation of a positive test result; 6. Interpretation of a negative test result; 7. Diagnosis of  
188 an invalid test result; 8. Reliability of self-test result; 9. Meaning of a positive result; and 10.  
189 Detection of the virus. The participants who correctly answered all 10 questions were  
190 considered to have correctly understood the instructions for use.

191 After this survey, participants were randomized in two groups for evaluation on  
192 performing the self-test and the interpretation of test results. In order to achieve this, a sealed  
193 randomization envelope was used sequentially. In each group, before starting the survey, a pre-  
194 test satisfaction questionnaire was completed by the participants.

195 **Substudy 2. Observation of manipulation.** In a private setting supervised by  
196 an observer, each participant received a box containing the Exacto<sup>®</sup> COVID-19 self-test  
197 (Biosynex Swiss SA). Participants were then asked to carry out the self-test by themselves in  
198 front of a trained observer. The observer was responsible for recording the respect or not of  
199 each step, provide verbal assistance (mimicking telephone support), difficulty, and errors on a  
200 standardized sheet. The successful performance of the SARS-CoV-2 self-test was conditioned  
201 by the presence of the control band on test strip, and the test results were read and recorded  
202 independently by both the participants and the observers. Note that, all individuals with a  
203 positive serological result were referred to the laboratory for diagnostic confirmation and to the  
204 hospital for management.

205 **Substudy 3. Interpretation of test results.** In a private setting supervised by an  
206 observer, eight standardized test results including four positive tests (one weak positive for  
207 IgM, one clearly positive for IgM, one clearly positive for IgG but weak positive for IgM, and  
208 one clearly positive for IgM and IgG), two negative tests, and two invalid tests were provided  
209 to the participants for interpretation after random selection of four tests (Fig 2). These  
210 standardized tests were coded by numbers to determine the expected results.

211

212 **Fig 2. Interpretation of self-test results. A.** The self-test result was interpreted as negative  
213 when a Control line (C) was present and readable and the “IgG” and “IgM” lines were absent.  
214 It was positive when a “C” and “IgM” (clearly or poorly readable) (case 1), or “C” and “IgG”,  
215 or “C”, “IgM” (clearly or poorly readable), and “IgG” lines were present. Finally, it was invalid  
216 when the “C” line was absent regardless of the presence or absence of the “IgG” and/or “IgM”  
217 line. **B.** Panel of 8 Exacto® COVID-19 self-test (Biosynex Swiss SA) cassettes, including 4  
218 positive tests (#2, #3, #6 and #7), 2 negative tests (#4 and #8) and 2 invalid tests (#1 and #5).  
219 The #2 and #37 are weakly positive for IgM. Each volunteer randomly drew 4 tests among a  
220 panel of 8 and interpreted them with the help of the reading and interpretation scale. The  
221 observer noted the number of the drawn test and the result given by the participant.

222

223 **Substudy 4. Satisfaction questionnaire.** Finally, the participants fulfilled the  
224 satisfaction questionnaire concerning their experiences with the COVID-19 self-test including  
225 understanding of instructions for use, the identification of the different components of the kit,  
226 the sample collection and transfer, the overall performance of the self-test, the reading and  
227 interpretation of test results, and the ability to overcome the difficulties encountered.

228

229 **Statistical analysis.** All data were entered into an Excel file and analyzed on SPSS 20.0  
230 (Chicago, IL). Descriptive statistics were computed using mean (standard deviation) or median  
231 (interquartile range) for normal or skewed distribution, respectively, then, proportions of all  
232 categorical variables were calculated for qualitative data. The labeling index for understanding  
233 and usability index were defined as the mean of the correct answers for each question related  
234 to the understanding of instructions for use and performing of the COVID-19 self-test,  
235 respectively. The Wilson score bounds were used to estimate the 95% confidence intervals (CI).

236 Cohen's  $\kappa$  coefficient estimated the concordance between the results read by participants in  
 237 connection with the expected results [26]. The degree of agreement was determined as ranked  
 238 by Landlis and Koch [27]. The comparison of data from the post-test satisfaction questionnaire  
 239 paired to those from the pre-test satisfaction questionnaire was performed by using Mac  
 240 Nemar's chi-squared pairing test.

241

## 242 Results

243

244 **Study population.** A total of 194 individuals were assessed for eligibility, but 27 were  
 245 excluded because they were trained (n=12), less than 18 years old (n=5), or not consenting  
 246 (n=10). Finally, 167 were successfully enrolled in the study (substudies 1 and 4), and among  
 247 them, 83 were assigned after randomization in substudy 2 and 84 in substudy 3 (Fig 1). The  
 248 demographic characteristics and medical history of study participants are shown in Table 1.  
 249 Overall, 88 (52.7%) were female. The mean age was 38.6 (SD: 13.8) years, and around one half  
 250 of participants were aged between 18 and 39 years. The majority (82.0%) of participants had  
 251 post-graduate education level. The majority (59.3%) had reported no symptoms of COVID-19  
 252 in the past two months. Approximately one fifth of participants had previously been screened  
 253 for SARS-CoV-2 infection by molecular testing of nasopharyngeal swab, of whom 13.4% had  
 254 a positive result (Table 1).

255

256 **Table 1.** The demographic characteristics and medical history of the 167 study participants.

| Variable           | Items  | Number (%) |
|--------------------|--------|------------|
| <b>Sex</b>         |        |            |
|                    | Male   | 79 (47.3)  |
|                    | Female | 88 (52.7)  |
| <b>Age (years)</b> |        |            |

|                                                                                      |                     |             |
|--------------------------------------------------------------------------------------|---------------------|-------------|
|                                                                                      | 18 – 39             | 88 (52.7)   |
|                                                                                      | ≥ 40                | 79 (47.3)   |
| Mean (SD)                                                                            |                     | 38.6 (13.8) |
| <b>Educational level</b>                                                             |                     |             |
|                                                                                      | College level       | 14 (8.4)    |
|                                                                                      | High school level   | 16 (9.6)    |
|                                                                                      | Post-graduate level | 137 (82.0)  |
| <b>Had the symptoms of COVID-19 in the past two months<sup>#</sup></b>               |                     |             |
|                                                                                      | Yes                 | 68 (40.7)   |
|                                                                                      | No                  | 99 (59.3)   |
| <b>Previous COVID-19 molecular testing (nasopharyngeal swab)</b>                     |                     |             |
|                                                                                      | Yes                 | 34 (20.4)   |
|                                                                                      | No                  | 133 (79.6)  |
| <b>Previously diagnosed COVID-19 positive among those previously COVID-19 tested</b> |                     |             |
|                                                                                      | Yes                 | 22 (13.2)   |
|                                                                                      | No                  | 145 (86.8)  |

257 <sup>#</sup> Participants who reported having at least one of the following major symptoms associated or not with minor symptoms were  
 258 considered to have the COVID-19 symptom: fever, fatigue, dry cough, anosmia and dyspnea. Minor symptoms were: pain, nasal  
 259 congestion, runny nose, sore throat or diarrhea.

260

261 COVID-19: Coronavirus disease 2019; RT-PCR: Reverse transcription-polymerase chain reaction; SD: Standard deviation.

262

263 **Substudy 1.** This substudy evaluated the ability of the 167 study participants to understand  
 264 the instructions for use of the Exacto<sup>®</sup> COVID-19 self-test (Biosynex Swiss SA). A large  
 265 majority ( $n=155$ ; 92.8%) of participants preferred to use the paper-based instructions whereas  
 266 only 12 (7.2%) participants used the video-based instructions. The analytical results of the  
 267 evaluation questionnaire are shown in Table 2. Overall, 149 (89.2%; 95% CI: 83.6–93.1)  
 268 participants correctly understood the instructions for use, thus correctly answering all 10  
 269 questions. The labeling index for understanding measuring the mean of the correct answers for  
 270 each question was 97.1% (95% CI: 93.3–98.8). The question concerning the non-detection of  
 271 the virus (SARS-CoV-2) by the self-test showed the highest rate (10.2%) of incorrect response.

272



273 **Table 2.** Analytical results of the evaluation questionnaire concerning the ability of the 167 study  
 274 participants to understand the instruction for use of the Exacto® COVID-19 self-test (Biosynex Swiss SA)  
 275 (substudy 1). The questions raising specific issues concerning the manipulation of the kit, the interpretation  
 276 of test results, and the consequence of test results, were asked by the observer and the answers were closed.

| Comprehension of labeling checklist*                                                                                                                 | Participants' responses |                       |                            |
|------------------------------------------------------------------------------------------------------------------------------------------------------|-------------------------|-----------------------|----------------------------|
|                                                                                                                                                      | True<br>[number (%)]    | False<br>[number (%)] | Don't know<br>[number (%)] |
| Q1: "A capital letter is associated with each component of the kit to better identify it during the performance of self-test"                        | 166 (99.4)              | -                     | 1 (0.6)                    |
| Q2: "The blood collection device (lancet) helps to collect the blood and transfer it immediately into the SQUARE well of self-test with the pipette" | 165 (98.8)              | 1 (0.6)               | 1 (0.6)                    |
| Q3: "Two drops of diluent should be placed in the same well as the drop of blood"                                                                    | 2 (1.2)                 | 163 (97.6)            | 2 (1.2)                    |
| Q4: "A timer (watch or mobile) to clock 10 minutes before reading the result is need"                                                                | 167 (100)               | -                     | -                          |
| Q5: "Presence of a readable strip next to IgM and/or IgG on the self-test cassette means that the test is positive"                                  | 166 (99.4)              | 1 (0.6)               | -                          |
| Q6: "Lack of band by test results is interpreted as a negative test"                                                                                 | 4 (2.4)                 | 162 (97.0)            | 1 (0.6)                    |
| Q7: "Lack of control band by test results should be interpreted as an invalid test"                                                                  | 167 (100)               | -                     | -                          |
| Q8: "Having symptoms less than 10 days before the test does not provide a reliable result"                                                           | 157 (94.0)              | 7 (4.2)               | 3 (1.8)                    |
| Q9: "If the test is positive it means that they have been in contact with the virus"                                                                 | 163 (97.6)              | 3 (1.8)               | 1 (0.6)                    |
| Q10: "The Exacto® COVID-19 self-test does not detect the presence of the virus"                                                                      | 148 (88.6)              | 17 (10.2)             | 2 (1.2)                    |
| <i>Labeling index for understanding (% [95% CI])<sup>£</sup></i>                                                                                     | 97.1 [93.3–98.8]        |                       |                            |
| <i>Correct understanding of the instruction for use (n; % [95% CI])<sup>#</sup></i>                                                                  | 149; 89.2 [83.6–93.1]   |                       |                            |

277 \* Overall, 155 (92.8%) participants preferred to use the paper-based instruction whereas only 12 (7.2%) participants used the video-based  
 278 instruction;

279 <sup>£</sup> The labeling index for understanding was defined as the mean of the correct answers for each question;

280 <sup>#</sup> The participants who correctly answered all 10 questions were considered to have correctly understood the instructions for use.

281

282 CI: Confidence interval; COVID-19: Coronavirus disease 2019; Q: Question.

283

284 **Substudy 2.** This substudy evaluated the ability of participants to use the Exacto® COVID-  
 285 19 self-test (Biosynex Swiss SA) in a supervised setting. The results of the questionnaire are  
 286 shown in Table 3. Overall, all participants (100%; 95% CI: 95.6–100) performed the self-test  
 287 and succeeded in obtaining a valid test result with an overall usability index of 98.5% (95% CI:

288 93.0–99.7). Seventy (83.1%; 95% CI: 75.0–90.6) participants correctly used the self-test  
 289 without any difficulties, errors, and help, whereas 12 (14.5%; 95% CI: 8.5–23.6) had asked for  
 290 verbal help. The identification of the different components of the kit, the use of the lancet and  
 291 pipette, and the transfer of blood were the steps requiring the most frequent verbal help in 1.2%,  
 292 2.4%, 8.4%, and 2.4%, respectively (Table 3). Interestingly, all participants (n=6; 7.2%) using  
 293 the video instructions performed the self-test easily (usability index of 100%) without any  
 294 difficulties, errors, and help. Overall, the mean time of self-test performance (since the opening  
 295 of the box until the migration step) was 8.8 (SD: 3.0) minutes. Note that, in this substudy, 11  
 296 (13.3%) people had a positive results with the self-test, and they were **or** **sp** **ed** to laboratory for  
 297 result confirmation.

298

299 **Table 3.** Analytical results of the manipulation observation concerning the ability of the randomly selected  
 300 83 study participants to correctly use each step of the Exacto<sup>®</sup> COVID-19 self-test (Biosynex Swiss SA)  
 301 autonomously or with verbal help (substudy 2).

| Usability checklist*                                                                                                              | Successful manipulation |                    | Need for verbal help |
|-----------------------------------------------------------------------------------------------------------------------------------|-------------------------|--------------------|----------------------|
|                                                                                                                                   | Yes<br>[number (%)]     | No<br>[number (%)] | Yes<br>[number (%)]  |
| 1. Did the participant read the instruction for use?                                                                              | 83 (100)                | -                  | -                    |
| 2. Did the participant easily identify the different components of the kit?                                                       | 82 (98.8)               | 1 (1.2)            | 1 (1.2)              |
| 3. Did the participant wash his hands?                                                                                            | 83 (100)                | -                  | -                    |
| 4. Did the participant properly remove the test cassette from the aluminum pouch?                                                 | 81 (97.6)               | 2 (2.4)            | -                    |
| 5. Did the participant open the diluent vial correctly?                                                                           | 83 (100)                | -                  | -                    |
| 6. Did the participant disinfect his finger correctly?                                                                            | 83 (100)                | -                  | -                    |
| 7. Did the participant wipe residual alcohol with the compress?                                                                   | 82 (98.8)               | 1 (1.2)            | -                    |
| 8. Did the participant have difficulty lancing their finger?                                                                      | 2 (2.4)                 | 81 (97.6)          | 2 (2.4)              |
| 9. Did the participant have difficulty forming a blood droplet?                                                                   | 1 (1.2)                 | 82 (98.8)          | -                    |
| 10. Did the participant have difficulty using the pipette correctly until it was filled up to the blank line?                     | 7 (8.4)                 | 76 (91.6)          | 7 (8.4)              |
| 11. Did the participant correctly transfer and deposit the blood into the SQUARE well of the test cassette?                       | 81 (97.6)               | 2 (2.4)            | 2 (2.4)              |
| 12. Did the participant shed two drops of diluent in the ROUND well of the test cassette?                                         | 83 (100)                | -                  | -                    |
| 13. Did the Participant obtain an interpretable result at the end of the process despite a missed or incorrect step? <sup>#</sup> | 83 (100)                | -                  | -                    |
| <i>Usability index and overall need for help (% [95% CI])<sup>‡</sup></i>                                                         | 98.5 [93.0–99.7]        |                    | 14.5 [8.5–23.6]      |
| <i>Correct use without difficulties, errors, and helps (n; % [95% CI])</i>                                                        | 70; 83.1 [75.0–90.6]    |                    |                      |

|                                                    |           |
|----------------------------------------------------|-----------|
| <i>Average time of manipulation (minutes [SD])</i> | 8.8 [3.0] |
|----------------------------------------------------|-----------|

302 \* 6 (7.2) participants had used the video-based instruction for use; among them the usability index was estimated to 100% without any  
 303 difficulties, errors, and help;

304 # The result was considered interpretable when a control strip was readable after the migration time recommended by the manufacturer;  
 305 in the present series, 11 (13.3%) participants had a positive self-test result;

306 ‡ The usability index was defined as the mean of the correct answers for each question.

307

308 CI: Confidence interval; SD: Standard deviation.

309

310

311 **Substudy 3.** This substudy evaluated the ability of participants to read and interpret the  
 312 COVID-19 self-test results after random selection of four tests from a panel of eight  
 313 standardized tests. The results are depicted in Fig 3. Overall, 336 standardized tests were read  
 314 and interpreted by the 84 participants, including 171 positive, 84 negative, and 81 invalid test  
 315 results. A total of 331 (98.5%; 95% CI: 96.5–99.4) tests were correctly interpreted, whereas 5  
 316 (1.5%; 95% CI: 0.6–3.5) tests were misinterpreted. Misinterpretation occurred in 2.3% (n=4)  
 317 of positive tests (all tests were weakly positive for IgM tests falsely interpreted as negative) and  
 318 in 1.2% (n=1) of invalid tests falsely interpreted as negative. Cohen's  $\kappa$  coefficient between the  
 319 results of reading by participants and the expected results was 0.98, demonstrating an excellent  
 320 concordance.

321

322 **Fig 3.** Stacked columns showing the ability of participants to read and interpret (correctly or  
 323 incorrectly) the 336 results of the Exacto<sup>®</sup> COVID-19 self-test (Biosynex Swiss SA) obtained  
 324 from random selection of a panel of 8 standardized tests, including four positive, two negative,  
 325 and two invalid test results.

326

327 **Substudy 4.** This substudy assessed the pre-test and post-test satisfaction of participants  
 328 concerning the instructions for use (substudy 1), performing the COVID-19 self-test (substudy  
 329 2), and the interpretation of test results (substudy 3). The results of the questionnaire are shown  
 330 in Table 4. The understanding of the instructions for use of the self-test was considered easy in  
 331 pre-test satisfaction questionnaire as well as in post-test period (100% *versus* 97.6%; not  
 332 significant). However, 92.8% of participants found that the sample collection was very easy in  
 333 pre-test satisfaction questionnaire whereas this satisfaction decreased after self-testing to  
 334 71.1%, yielding a difference of -21,7 (95% CI: -31.7 to -11.7;  $P < 0.001$ ). Similar decrease was  
 335 observed with the satisfaction of sample transfer (81.2% *versus* 60.2%; difference: -21.0%  
 336 [95% CI: -30.9 to 11.1];  $P < 0.001$ ). Concerning the interpretation of test results, the participants  
 337 found it easy in pre-test satisfaction questionnaire as well as in post-test period (100% *versus*  
 338 98.8%; not significant). Finally, when asked about the ability to surmount the difficulties  
 339 encountered during COVID-19 self-testing, all (100%) participants found it easy (97.0% very  
 340 easy; 3.0% rather easy).

341

342 **Table 4.** Items and results of the pre-test and post-test satisfaction questionnaire and concerning the  
 343 instruction notice (substudy 1), the performing of the Exacto COVID-19 self-test (Biosynex Swiss SA)  
 344 (substudy 2), and the interpretation of test results (substudy 3).

| Satisfaction questionnaire                                                                    | Pre-test satisfaction<br>[number (%)] | Post-test satisfaction<br>[number (%)] | Difference*<br>% [95% CI] | P-value# |
|-----------------------------------------------------------------------------------------------|---------------------------------------|----------------------------------------|---------------------------|----------|
| How did you find the understandability of instructions for use of self-test? (N=167)          |                                       |                                        |                           |          |
| Very easy                                                                                     | 156 (93.4)                            | 153 (91.6)                             | -1.8 (-5.1 to +1.5)       | NS       |
| Rather easy                                                                                   | 11 (6.6)                              | 10 (6,0)                               | -0.6 (-3.3 to +2.1)       | NS       |
| Rather difficult                                                                              | 0 (0)                                 | 2 (1.2)                                | +1.2 (-1.8 to +4.2)       | NS       |
| Very difficult                                                                                | 0 (0)                                 | 2 (1.2)                                | +1.2 (-1.8 to +4.2)       | NS       |
| How did you find the identification of the different components of the self-test kits? (N=83) |                                       |                                        |                           |          |
| Very easy                                                                                     | 81 (97.6)                             | 80 (96.4)                              | -1.2 (-6.5 to +4.3)       | NS       |
| Rather easy                                                                                   | 2 (2.4)                               | 3 (3.6)                                | +1.2 (-4.1 to +6.5)       | NS       |
| Rather difficult                                                                              | 0 (0)                                 | 0 (0)                                  | -                         | NA       |
| Very difficult                                                                                | 0 (0)                                 | 0 (0)                                  | -                         | NA       |
| How did you find the sample collection? (N=83)                                                |                                       |                                        |                           |          |

|                                                                                 |           |            |                        |        |
|---------------------------------------------------------------------------------|-----------|------------|------------------------|--------|
| Very easy                                                                       | 77 (92.8) | 59 (71.1)  | -21,7 (-31.7 to -11.7) | <0.001 |
| Rather easy                                                                     | 5 (6.0)   | 20 (24.1)  | +18.1 (+11.3 to +27.7) | <0.001 |
| Rather difficult                                                                | 0 (0)     | 1 (1.2)    | +1.2 (-4.1 to +6.5)    | NS     |
| Very difficult                                                                  | 1 (1.2)   | 3 (3.6)    | +2.4 (-3.5 to 8.3)     | NS     |
| How did you find the sample transfer? (N=83)                                    |           |            |                        |        |
| Very easy                                                                       | 68 (81.2) | 50 (60.2)  | -21.0 (-30.9 to 11.1)  | <0.001 |
| Rather easy                                                                     | 14 (16.9) | 25 (30.1)  | +13.2 (+4.3 to +22.1)  | 0.043  |
| Rather difficult                                                                | 0 (0)     | 2 (2.4)    | +2.4 (-3.5 to +8.3)    | NS     |
| Very difficult                                                                  | 1 (1.2)   | 6 (7.2)    | +6.0 (-1.3 to +13.3)   | NS     |
| How did you find the overall performance of self-test? (N=83)                   |           |            |                        |        |
| Very easy                                                                       | 80 (96.4) | 77 (92.8)  | -3.6 (-10.1 to +2.9)   | NS     |
| Rather easy                                                                     | 2 (2.4)   | 6 (7.2)    | +4.8 (-2.1 to +11.7)   | NS     |
| Rather difficult                                                                | 1 (1.2)   | 0 (0)      | -1.2 (-6.5 to +4.3)    | NS     |
| Very difficult                                                                  | 0 (0)     | 0 (0)      | -                      | NA     |
| How did you find the reading of strips after migration? (N=84)                  |           |            |                        |        |
| Very easy                                                                       | 73 (86.9) | 70 (83.3)  | -3.6 (-10.0 to +3.0)   | NS     |
| Rather easy                                                                     | 8 (9.5)   | 10 (11.9)  | +2.4 (-3.4 to 8.4)     | NS     |
| Rather difficult                                                                | 2 (2.4)   | 3 (3.6)    | +1.2 (-4.0 to +6.4)    | NS     |
| Very difficult                                                                  | 1 (1.2)   | 1 (1.2)    | -                      | NA     |
| How did you find the interpretation of self-test results? (N=84)                |           |            |                        |        |
| Very easy                                                                       | 76 (90.5) | 76 (90.5)  | -                      | NA     |
| Rather easy                                                                     | 8 (9.5)   | 7 (8.3)    | -1.2 (-6.4 to +4.2)    | NS     |
| Rather difficult                                                                | 0 (0)     | 0 (0)      | -                      | NA     |
| Very difficult                                                                  | 0 (0)     | 1 (1.2)    | +1.2 (-4.0 to +6.4)    | NS     |
| How did you find your ability to surmount the difficulties encountered? (N=167) |           |            |                        |        |
| Very easy                                                                       | -         | 162 (97.0) | NA                     | NA     |
| Rather easy                                                                     | -         | 5 (3.0)    | NA                     | NA     |
| Rather difficult                                                                | -         | 0          | NA                     | NA     |
| Very difficult                                                                  | -         | 0          | NA                     | NA     |

345 \* Difference and CI were assessed with the Wilson score bounds using data collected in the post-test satisfaction questionnaire paired to those

346 from the pre-test satisfaction questionnaire;

347 # *P*-value calculated using Mac Nemar's test of paired data.

348

349 CI: Confidence interval; NA: Not applicable; NS: Not significant.

350

## 351 Discussion

352

353 We herein report on our recent experience during the last COVID-19 epidemic peak

354 period of the practicability of a prototype capillary whole-blood COVID-19 self-test for IgG

355 and IgM against SARS-CoV-2 serological screening among adult volunteers living in France.

356 Our assessment of usability was made with reference to our previous experience in evaluating

357 HIV self-testing according to the WHO recommendations [25]. Overall, the vast majority of

358 participants correctly understood the instructions for use, showed good ability to carry out the  
359 self-testing procedure in order to obtain a valid test result, and demonstrated to be capable to  
360 correctly interpret the test results with high degree of satisfaction. Only a minority of  
361 participants needed verbal help, and only 1.5% of test results were misinterpreted. Taken  
362 together, our pilot study generated for the first-time to our knowledge evidence on generally  
363 good practicability of COVID-19 self-testing for serological IgG and IgM immune status,  
364 despite some limitations. These findings also provide the observational basis for the possibility  
365 of using with high confidence self-tests harboring 3 bands of interest, *i.e.* in the case of the  
366 prototype COVID-19 self-test, the control, IgG and IgM bands. Finally, our observations lay  
367 the foundations for the potential large-scale use of COVID-19 self-test in lay adults, at least  
368 Europeans of high educational attainment, to complete the arsenal of available serological tests  
369 used to assess the immune status vis-a-vis SARS-CoV-2.

370 **Substudy 1.** The learning process in different fields of science needs to link theory  
371 to practice [28]. The expected results of substudy 1 are, therefore, important for the following  
372 practicability substudies 2 and 3, because it is mandatory to check that the instructions for use  
373 can be read and understood by all users. Our findings showed that 89.2% of participants  
374 correctly answered all 10 questions indicating generally correct understanding of the key  
375 messages delivered by the instructions for use of the Exacto<sup>®</sup> COVID-19 self-test (Biosynex  
376 Swiss SA), with an overall rate of good responses of 97.1%. These satisfactory results may be  
377 explained in part by the high post-graduate education level of the majority of study participants.  
378 Indeed, previous experience from HIV self-testing showed that insufficient educational level  
379 constitutes a great challenge in the comprehension of the instructions for use [18,29-31].  
380  though systematic reviews and meta-analysis have shown that HIV self-testing can be  
381 successfully conducted by untrained users without in-person demonstrations [30], our  
382 observations emphasize the need to complete the classical paper instructions for use by other



383 instructional tools such as short video film, which was preferred by 1 of 13 study participants  
384 for better instructions for use understanding. These findings are reminiscent to previous WHO  
385 recommendations for HIV self-test stating that all self-testers should have the possibility to  
386 access or receive assistance over the phone, through the internet, or with additional instructions  
387 such as video, animations, or diagrams [15].

388 **Substudy 2.** All study participants carried out the COVID-19 self-test and  
389 succeeded in obtaining a valid test result with an overall usability index estimated at 98.5%.  
390 Some difficulty in the correct use of the pipette to transfer the blood sample was the principal  
391 reported concern encountered and was the most common reason for oral help. In previous  
392 reports on HIV self-testing, the difficulties in self-lancing and blood transfer to the cassette  
393 were also observed by lay users [32]. These features underline the importance of video  
394 instructions, when available. Although a small sample size of participants used the video  
395 instructions in this series, all of them not needed any help and used the pipette without any  
396 difficulty or error. The use of a hotline could also offer direct distant assistance.

397 **Substudy 3.** The ability to correctly read and interpret the self-test results is  
398 considered as a critical step in self-testing [33]. This refers not only to the visual subjectivity  
399 related to good visual acuity (*i.e.* eye without illness) when reading and interpreting the results,  
400 but also to the number of bands to read on the test strip. Indeed, the Exacto<sup>®</sup> COVID-19 self-  
401 test (Biosynex Swiss SA) has three bands, one of which is for the internal control and two for  
402 the detection of IgG and IgM antibodies. The interpretation of a weak positive band may be  
403 therefore difficult for untrained users. In our series, the rate (98.8%) of correct interpretation of  
404 COVID-19 self-test results was high, as previously reported with HIV self-test using similar  
405 cassette [17,18]. However, the majority (80%) of misinterpreted test results concerned a weak  
406 positive IgM band. This difficulty in reading some weak positive bands and in final

407 interpretation of test results can even occur in lay users as well as trained-users during  
408 professional testing [34].

409         On the other hand, the interpretation of positive results with the serological IgM and  
410 IgG test of SARS-CoV-2 presents particularities in this period of the ongoing outbreak. While  
411 positive serology for other viral infections such as HIV means an active infection [35], a  
412 positive test result with the Exacto<sup>®</sup> COVID-19 self-test (Biosynex Swiss SA) rather indicates  
413 ongoing or previous SARS-CoV-2 infection, with serological immune IgG or IgM immune  
414 responses to SARS-CoV-2. Furthermore, according to the kinetic profile of the systemic  
415 humoral response against SARS-CoV-2 and the lifespan of circulating immunoglobulins, the  
416 presence of IgM alone or with IgG means that the contact with the virus was relatively recent  
417 [36]. The presence of IgG means that the contact with the virus occurred at least 14 days ago  
418 [36]. Thus, a positive test result on the COVID-19 self-test does not mean that the SARS-CoV-  
419 2 infection is still active. Despite the explanations were clearly given in the instructions for use,  
420 10.2% of study participants were not aware that the COVID-19 self-test does not detect the  
421 presence of the virus. This misinterpretation of positive test results can provide unfortunate  
422 consequences such as self-medication or psychological distress of variable intensity, especially  
423 in a person who has not received pre-test counseling [37].

424         **Substudy 4.** The pre-test and post-test answers to the satisfaction questionnaire  
425 concerning the instructions for use (substudy 1), performing the self-test (substudy 2), and the  
426 interpretation of the results (substudy 2), showed that the large majority of the COVID-19 self-  
427 testing steps were considered easy by participants, as previously reported for HIV self-testing  
428 using similar rapid test cassette [17,18]. However, the satisfaction with sample collection and  
429 blood transfer to the test cassette evolved from “very easy” in pre-test period to “rather easy”  
430 after having performed the self-test. This latter observation reminds us our previous experience

431 with HIV self-testing, during which the fear of self-sticking provided capillary blood sample  
432 collection difficult in a minority of lay user [18].

433 **Strengths and limitations.** Our study is original by highlighting for the first  
434 time the usability of COVID-19 self-test, as a novel approach to assess SARS-CoV-2-specific  
435 humoral immunity by using rapid diagnostic test and self-interpretation of the results. Our study  
436 also shows for the first time the possibility of correctly interpreting three bands on the strip of  
437 a rapid diagnostic test by lay users from general adult population. However, the study has some  
438 limitations. First, the presence of an observer may lead to a bias in our observations concerning  
439 the participants' ability to perform the tests and to interpret the results. Furthermore, the low  
440 sample size could reduce the study's power to detect a relative difference between groups with  
441 high precision. Finally, further steps are needed to improve mass screening for COVID-19,  
442 including the development of other tests such as oral fluid based self-testing, antigen self-  
443 testing, as well as home self-sampling.

444 The role of the COVID-19 self-test in fighting the epidemic, caring for infected people  
445 and preventing risk of transmission is not yet known. The possible risk of adverse effects of the  
446 COVID-19 self-test should not be underestimated, such as a **pseudo-insurance of immunity or**  
447 **non-contagiousness.** Furthermore, there is limited understanding of adult public acceptability  
448 and usability of rapid diagnostic tests in the home setting, as most are currently designed as  
449 professional use to be carried out by healthcare professionals. **It will of course be necessary to**  
450 **precisely assess all these potential perverse effects.** However, the place of the COVID-19 self-  
451 test could simply be a complementary public health tool. Indeed, testing a large number of  
452 individuals for serological survey for example would be impractical if a blood sample is  
453 required for SARS-CoV-2 serologic testing in a laboratory. The solution to use self-sampling  
454 and self-testing with participants reporting their results to the clinicians or epidemiologists has

455 been recently reported in a nationally representative serosurvey of SARS-CoV-2 in adults in  
456 England, demonstrating its  feasibility [38].

457         According to the WHO [39], generalization of COVID-19 testing is key to controlling  
458 the spread of SARS-CoV-2 infection. In particular, the findings derived from serological assays  
459 can provide valuable information that would help to support the diagnosis, treatment and  
460 prevention of SARS-CoV-2 infection [40]. During the COVID-19 epidemic, novel approaches  
461 using individual involvement were proposed in addition to the collective public health  
462 approach, and both strategies were furthermore sometimes combined. For example, self-  
463 collected upper respiratory tract swabs for COVID-19 test has been shown as a feasible way to  
464 increase overall testing rate in South Africa [41], and the US Food and Drug Administration  
465 has approved the first kit for self-collected saliva specimen to be used for molecular testing of  
466 SARS-CoV-2 [42]. Self-diagnosis of breathing complications from breathing sounds using the  
467 smartphone's microphone has been proposed as an appealing resolution for COVID-19 self-  
468 testing [43]. Self-reporting of an illness consistent with COVID-19 and artificial intelligence-  
469 coupled self-testing and tracking systems for COVID-19 have been developed using mobile  
470 phone applications [44,45]. While the place of SARS-CoV-2-specific serology remains  
471 controversial [46,47], the indications for the COVID-19 serological self-test have been the  
472 matter of poor attention from official agencies until now and remain to be defined [48]. It seems  
473 obvious that the motivations for carrying out a COVID-19 self-test would be clearly different  
474 than those which push to carry out an HIV self-test. The COVID-19 self-test allows an  
475 individual to test himself simply and quickly, without visiting a care structure, with the essential  
476 aim of knowing if the person is in the course of infection (presence of specific IgM alone) or  
477 had a past infection (presence of specific IgG, alone or associated with IgM). Thus, COVID-19  
478 self-testing for serological screening could be proposed to identify exposed patients that are  
479 presumptively immune to SARS-CoV-2 secondary to ongoing or past-infection and to quantify

480 the prevalence of exposure within a population for epidemiologic purposes. The instructions  
481 for use clearly explains that the lack of reactivity does not eliminate a SARS-CoV-2 infection  
482 in progress, and that in the presence of any IgG or IgM reactivities the patient must seek  
483 confirmatory antibody test by a clinical laboratory and clinical follow-up, which could  
484 contribute to accentuating tensions in the healthcare system, in particular during epidemic  
485 periods. In any case, the presence of reactivities could constitute an "immunological passport"  
486 of protection [46,47], although the general assumption is that the presence of antibodies will  
487 provide at least some immunity [49]. However, it should be emphasized that the level of  
488 protection of seropositivity for SARS-CoV-2 as well as its duration are not known, and even  
489 that the presence of specific antibodies does not mean that the person is not contagious,  
490 particularly in onset of infection. It will therefore be important to pass this information on to  
491 subjects who self-test so that they continue to take precautions to protect themselves and others.  
492 While specific guidelines regarding how "presumptive immunity" will be determined and used  
493 do not exist, this potential use has probably generated the interest in the lay public [47]. In any  
494 case, an IgG positive COVID-19 self-test result may indicate recovery of a previous SARS-  
495 CoV-2 infection, even asymptomatic or mild. Interestingly, serological home testing could be  
496 associated with at-home saliva or swab self-sampling for further SARS-CoV-2 molecular  
497 diagnosis, and the widespread use of both home approaches is worthy of further study. Those  
498 whom the viral test indicates an active SARS-CoV-2 infection (including silent carriers and  
499 individuals with early or mild symptoms) will be able to take informed actions, such as self-  
500 isolation. Furthermore, the risk exposure of the healthy population will be mitigated by the  
501 actions taken by the (informed) infected population, thus slowing the spread of the coronavirus  
502 and flattening the curve. Importantly, a confirmed population of "recovered" individuals may  
503 facilitate many to return to work, lead to partial lifting of "stay-at-home" or "shelter-in-place"  
504 orders, and would help get the economy back to normal, with no loss in protection for the most

505 vulnerable. Recently, the British government, UK, are making available SARS-CoV-2 antibody  
506 home tests for healthcare workers and the general public [50]. Home testing will be voluntary,  
507 but there is no doubt more people will test if the tests could be freely available.

508       Until a cure or a vaccine becomes available, antibody and viral testing for SARS-CoV-  
509 2 infection will play a critical role in limiting the pandemic and containing its economic damage  
510 to individuals and the country. Our findings demonstrate that COVID-19 self-testing for  
511 serological immune status assessment is highly feasible with potential for use by at least some  
512 groups with high levels of education. If deployed wisely, it may be complementary to other  
513 serological screening tools and could facilitate uptake of SARS-CoV-2 serology.

514

515 **Acknowledgments.** The authors are grateful to the volunteers for their willingness  
516 to participate in the study. We also thank Biosynex, Strasbourg, France, for providing the  
517 Exacto<sup>®</sup> COVID-19 self-tests for the study.

518

519

520

521

## 522 **References**

523

- 524 1. Zhu N, Zhang D, Wang W, Li X, Yang B, Song J, et al. A novel coronavirus from patients with pneumonia in  
525 China, 2019. *N Engl J Med.* 2020;382:727–733.
- 526 2. Guan W, Ni Z, Hu Y, Liang W, Ou C, He J, et al. Clinical Characteristics of Coronavirus Disease 2019 in  
527 China. *N Engl J Med.* 2020;382:1708–1720.
- 528 3. Huang C, Wang Y, Li X, Ren L, Zhao J, Hu Y, et al. Clinical features of patients infected with 2019 novel  
529 coronavirus in Wuhan, China. *Lancet.* 2020;395:497–506.

- 530 4. World Health Organization. Coronavirus disease (COVID-19) outbreak. Available from: <https://www.who.int>  
531 (last access 13 June 2020).
- 532 5. Wölfel R, Corman VM, Guggemos W, Seilmaier M, Zange S, Müller MA, et al. Virological assessment of  
533 hospitalized patients with COVID-2019. *Nature*. 2020;581:465–469.
- 534 6. Péré H, Podglajen I, Wack M, Flamarion E, Mirault T, Goudot G, et al. Nasal Swab Sampling for SARS-CoV-  
535 2: a Convenient Alternative in Times of Nasopharyngeal Swab Shortage. *J Clin Microbiol*. 2020 May  
536 26;58(6):e00721-20.
- 537 7. Amanat F, Stadlbauer D, Strohmeier S, Nguyen THO, Chromikova V, McMahon M, et al. A serological assay  
538 to detect SARS-CoV-2 seroconversion in humans. *Nat Med*. 2020 May 12. doi: 10.1038/s41591-020-0913-5.  
539 Online ahead of print.
- 540 8. Long QX, Liu BZ, Deng HJ, Wu GC, Deng K, Chen YK, et al. Antibody responses to SARS-CoV-2 in patients  
541 with COVID-19. *Nat Med*. 2020 Jun;26(6):845-848.
- 542 9. Petherick A. 2020. Developing antibody tests for SARS-CoV-2. *Lancet* 395:1101–1102.
- 543 10. World Health Organization. 2020. Laboratory testing for coronavirus disease 2019 (COVID-19) in suspected  
544 human cases: interim guidance, 2 March 2020. World Health Organization. Available from:  
545 [https://apps.who.int/iris/bitstream/handle/10665/331329/WHO-COVID-19-laboratory-2020.4-](https://apps.who.int/iris/bitstream/handle/10665/331329/WHO-COVID-19-laboratory-2020.4-eng.pdf?sequence=1&isAllowed=y)  
546 [eng.pdf?sequence=1&isAllowed=y](https://apps.who.int/iris/bitstream/handle/10665/331329/WHO-COVID-19-laboratory-2020.4-eng.pdf?sequence=1&isAllowed=y) (last access 21 June 2020).
- 547 11. Li Z, Yi Y, Luo X, Xiong N, Liu Y, Li S, et al. Development and clinical application of a rapid IgM-IgG  
548 combined antibody test for SARS-CoV-2 infection diagnosis. *J Med Virol*. 2020 Feb 27;10.1002/jmv.25727.
- 549 12. Pérez-García F, Pérez-Tanoira R, Romanyk J, Arroyo T, Gómez-Herruz P, Cuadros-González J. Alltest rapid  
550 lateral flow immunoassays is reliable in diagnosing SARS-CoV-2 infection from 14 days after symptom onset:  
551 A prospective single-center study. *J Clin Virol*. 2020 May 27;129:104473.
- 552 13. Dellière S, Salmona M, Minier M, Gabassi A, Alanio A, Le Goff J, et al. Evaluation of COVID-19 IgG/IgM  
553 Rapid Test from Orient Gene Biotech. *J Clin Microbiol*. 2020 Jun 9;JCM.01233-20.
- 554 14. Zainol Rashid Z, Othman SN, Abdul Samat MN, Ali UK, Wong KK. Diagnostic Performance of COVID-19  
555 Serology Assays. *Malays J Pathol*. 2020 Apr;42(1):13-21.
- 556 15. World Health Organization. Guidelines on HIV self-testing and partner notification: supplement to  
557 consolidated guidelines on HIV testing services. December 2016. Available from:  
558 [http://apps.who.int/iris/bitstream/handle/10665/251655/9789241549868-](http://apps.who.int/iris/bitstream/handle/10665/251655/9789241549868-eng.pdf;jsessionid=B043673B59952F021C313F076554ABA6?sequence=1)  
559 [eng.pdf;jsessionid=B043673B59952F021C313F076554ABA6?sequence=1](http://apps.who.int/iris/bitstream/handle/10665/251655/9789241549868-eng.pdf;jsessionid=B043673B59952F021C313F076554ABA6?sequence=1). (last access 28 May 2020).

- 560 16. World Health Organization & UNITAID. Market and Technology Landscape. HIV rapid diagnostic tests for  
561 self-testing, 4th Edition. July 2018. Available from: <https://unitaid.org/assets/HIVST-landscape-report.pdf>  
562 (last access 18 June 2020).
- 563 17. Prazuck T, Karon S, Gubavu C, Andre J, Legall JM, Bouvet E, et al. A finger-stick whole-blood HIV self-test  
564 as an HIV screening tool adapted to the general public. *PloS One*. 2016;11(2):e0146755.
- 565 18. Tonen-Wolyec S, Batina-Agasa S, Muwonga J, Fwamba N’kulu F, Mboumba Bouassa RS, Belec L. Evaluation  
566 of the practicability and virological performance of finger-stick whole-blood HIV self-testing in French-  
567 speaking sub-Saharan Africa. *PLoS One* 2018; 13: e0189475.
- 568 19. Tonen-Wolyec S, Batina-Agasa S, Longo JD, Mboumba Bouassa RS, Bélec L. Insufficient education is a key  
569 factor of incorrect interpretation of HIV self-test results by female sex workers in Democratic Republic of the  
570 Congo: A multicenter cross-sectional study. *Medicine (Baltimore)*. 2019 Feb;98(6):e14218.
- 571 20. Tonen-Wolyec S, Batina-Agasa S, Muwonga J, Mboumba Bouassa RS, Kayembe Tshilumba C, Bélec L.  
572 Acceptability, feasibility, and individual preferences of blood-based HIV self-testing in a population-based  
573 sample of adolescents in Kisangani, Democratic Republic of the Congo. *PLoS One*. 2019 Jul  
574 1;14(7):e0218795.
- 575 21. Tonen-Wolyec S, Mboumba Bouassa RS, Batina-Agasa S, Tepungipame AT, Tshilumba CK, Bélec L.  
576 Sociodemographic characteristics of adolescents preferring home-based HIV self-testing over facility-based  
577 voluntary counseling and testing: a cross-sectional study in Kisangani, Democratic Republic of the Congo. *Int*  
578 *J STD AIDS*. 2020 Apr;31(5):481-487.
- 579 22. Ministère des Solidarités et de santé. Tests COVID-19, guider votre choix parmi les 155 tests Covid-19 du  
580 marché. France 2020. Available from: <https://covid-19.sante.gouv.fr/tests>. (last access 20 June 2020)
- 581 23. Haute Autorité de Santé. Cahier des charges définissant les modalités d’évaluation des performances des tests  
582 sérologiques détectant les anticorps dirigés contre le SARS-CoV-2. Saint-Denis, France, 2020. Available from:  
583 [https://www.has-sante.fr/upload/docs/application/pdf/2020-](https://www.has-sante.fr/upload/docs/application/pdf/2020-04/cahier_des_charges_test_serologique_covid19.pdf)  
584 [04/cahier\\_des\\_charges\\_test\\_serologique\\_covid19.pdf](https://www.has-sante.fr/upload/docs/application/pdf/2020-04/cahier_des_charges_test_serologique_covid19.pdf). (last access 20 June 2020)
- 585 24. Santé publique France. COVID-19 : point épidémiologique du 2 juillet 2020. Available from:  
586 [https://www.santepubliquefrance.fr/maladies-et-traumatismes/maladies-et-infections-respiratoires/infection-](https://www.santepubliquefrance.fr/maladies-et-traumatismes/maladies-et-infections-respiratoires/infection-a-coronavirus/documents/bulletin-national/covid-19-point-epidemiologique-du-2-juillet-2020)  
587 [a-coronavirus/documents/bulletin-national/covid-19-point-epidemiologique-du-2-juillet-2020](https://www.santepubliquefrance.fr/maladies-et-traumatismes/maladies-et-infections-respiratoires/infection-a-coronavirus/documents/bulletin-national/covid-19-point-epidemiologique-du-2-juillet-2020). (last access 02  
588 July 2020)



- 589 25. World Health Organization (WHO) WHO prequalification: Sample product dossier for an IVD intended for  
590 HIV self-testing. SIMU™ self-test for HIV 120 working document, December 2015.  
591 [http://www.who.int/sample\\_dos\\_self\\_testinghiv\\_for\\_public\\_c\\_\\_comment\\_v1\\_pdf](http://www.who.int/sample_dos_self_testinghiv_for_public_c__comment_v1_pdf). 2015. (last access 13 June  
592 2020).
- 593 26. Cohen J. A coefficient of agreement for nominal scales. *Educ. Psychol. Meas.* 1960;20:37-46.
- 594 27. Landis JR, Koch GG. The measurement of observer agreement for categorical data. *Biometrics.* 1997;33:159–  
595 174.
- 596 28. Neves BS, Altermann C, Gonçalves R, Lara MV, Mello-Carpes PB. Home-based vs. Laboratory-Based  
597 Practical Activities in the Learning of Human Physiology: The Perception of Students. *Adv Physiol Educ.* 2017  
598 Mar 1;41(1):89-93.
- 599 29. Tonen-Wolyec S, Mboup S, Grésenguét G, Bouassa RB, Bélec L. Insufficient education is a challenge for HIV  
600 self-testing. *Lancet HIV.* 2018; 5(7):e341.
- 601 30. Figueroa C, Johnson C, Ford N, Sands A, Dalal S, Meurant R, et al. Reliability of HIV rapid diagnostic tests  
602 for self-testing performed by self-testers compared to health-care workers: a systematic review and meta-  
603 analysis. *Lancet HIV.* 2018; 5(6):e277-e290.
- 604 31. Simwinda M, Kumwenda MK, Dacombe RJ, Kayira L, Muzumara A, Johnson CC, et al. Ability to understand  
605 and correctly follow HIV self-test kit instructions for use: applying the cognitive interview technique in Malawi  
606 and Zambia. *J Int AIDS Soc.* 2019 Mar; 22(Suppl Suppl 1): e25253.
- 607 32. Pant Pai N, Sharma J, Shivkumar S, Pillay S, Vadnais C, Joseph L, et al. Supervised and unsupervised self-  
608 testing for HIV in high- and low-risk populations: a systematic review. *PLoS Med.* 2013;10(4):e1001414.
- 609 33. Ortblad KF, Musoke DK, Ngabirano T, Nakitende A, Haberer JE, McConnell M, et al. Female sex workers  
610 often incorrectly interpret HIV self-test results in Uganda. *J Acquir Immune Defic Syndr* 2018;79:e42–5.
- 611 34. Tahlil KM, Ong JJ, Rosenberg NE, Tang W, Conserve DF, Nkengasong S, et al. Verification of HIV Self-  
612 Testing Use and Results: A Global Systematic Review. *AIDS Patient Care STDS.* 2020 Apr;34(4):147-156.
- 613 35. CDC, WHO, APL. Guidelines for Appropriate Evaluations of HIV Testing Technologies in Africa. 2001.
- 614 36. Sethuraman N, Jeremiah SS, Ryo A. Interpreting Diagnostic Tests for SARS-CoV-2. *JAMA.* 2020 May 6. doi:  
615 10.1001/jama.2020.8259.
- 616 37. Rogers JP, Chesney E, Oliver D, Pollak TA, McGuire P, Fusar-Poli P, et al. Psychiatric and neuropsychiatric  
617 presentations associated with severe coronavirus infections: a systematic review and meta-analysis with  
618 comparison to the COVID-19 pandemic. *Lancet Psychiatry.* 2020 Jul;7(7):611-627.

- 619 38. Atchison C, Pristerà P, Cooper E, Papageorgiou V, Redd R, Piggim M, Flower B, Fontana G, Satkunarajah S,  
620 Ashrafian H, Lawrence-Jones A, Naar L, Chigwende J, Gibbard S, Riley S, Darzi A, Elliott P, Ashby D,  
621 Barclay W, Cooke GS, Ward H. Usability and acceptability of home-based self-testing for SARS-CoV-2  
622 antibodies for population surveillance. *Clin Infect Dis*. 2020 Aug 12:ciaa1178. doi: 10.1093/cid/ciaa1178.
- 623 39. World Health Organization. Laboratory testing strategy recommendations for COVID-19. 22 Mar 2020.  
624 Available at : [https://apps.who.int/iris/bitstream/handle/10665/331509/WHO-COVID-19-lab\\_testing-2020.1-](https://apps.who.int/iris/bitstream/handle/10665/331509/WHO-COVID-19-lab_testing-2020.1-eng.pdf)  
625 [eng.pdf](https://apps.who.int/iris/bitstream/handle/10665/331509/WHO-COVID-19-lab_testing-2020.1-eng.pdf) (last access 24 June 2020).
- 626 40. Lee CY, Lin RTP, Renia L, Ng LFP. Serological Approaches for COVID-19: Epidemiologic Perspective on  
627 Surveillance and Control. *Front Immunol*. 2020 Apr 24;11:879.
- 628 41. Adeniji AA. 'Self-collected upper respiratory tract swabs for COVID-19 test': A feasible way to increase  
629 overall testing rate and conserve resources in South Africa. *Afr J Prim Health Care Fam Med*. 2020 May  
630 28;12(1):e1-e4.
- 631 42. Food and Drug Administration. FDA NEWS RELEASE. Coronavirus (COVID-19) Update: FDA Authorizes  
632 First Diagnostic Test Using At-Home Collection of Saliva Specimens. United states of America, 2020.  
633 Available at : [https://www.fda.gov/news-events/press-announcements/coronavirus-covid-19-update-fda-](https://www.fda.gov/news-events/press-announcements/coronavirus-covid-19-update-fda-authorizes-first-diagnostic-test-using-home-collection-saliva)  
634 [authorizes-first-diagnostic-test-using-home-collection-saliva](https://www.fda.gov/news-events/press-announcements/coronavirus-covid-19-update-fda-authorizes-first-diagnostic-test-using-home-collection-saliva) (last access: 24 June 2020).
- 635 43. Faezipour M, Abuzneid A. Smartphone-Based Self-Testing of COVID-19 Using Breathing Sounds. *Telemed*  
636 *J E Health*. 2020 Jun 2. doi: 10.1089/tmj.2020.0114.
- 637 44. McCullough PA, Eidt J, Rangaswami J, Lerma E, Tumlin J, Wheelan K, et al. Urgent need for individual  
638 mobile phone and institutional reporting of at home, hospitalized, and intensive care unit cases of SARS-CoV-  
639 2 (COVID-19) infection. *Rev Cardiovasc Med*. 2020 Mar 30;21(1):1-7.
- 640 45. Mashamba-Thompson TP, Crayton ED. Blockchain and Artificial Intelligence Technology for Novel  
641 Coronavirus Disease-19 Self-Testing. *Diagnostics (Basel)*. 2020 Apr 1;10(4):198.
- 642 46. Bélec L, Péré H, Mboumba Bouassa RS, Veyer D, Jenabian MA. Potential pitfalls of routine SARS-CoV-2  
643 serology for mass screening. *J Med Virol*. 2020 Jun 2;10.1002/jmv.26034.
- 644 47. Farnsworth CW, Anderson NW. SARS-CoV-2 Serology: Much Hype, Little Data. *Clin Chem*. 2020 Apr  
645 28:hvaa107.
- 646 48. Food and Drug Administration. FDA STATEMENT. Coronavirus (COVID-19) Update: FDA Alerts  
647 Consumers About Unauthorized Fraudulent COVID-19 Test Kits. United states of America, 2020. Available

648 at : [https://www.fda.gov/news-events/press-announcements/coronavirus-covid-19-update-fda-alerts-](https://www.fda.gov/news-events/press-announcements/coronavirus-covid-19-update-fda-alerts-consumers-about-unauthorized-fraudulent-covid-19-test-kits)  
649 [consumers-about-unauthorized-fraudulent-covid-19-test-kits](https://www.fda.gov/news-events/press-announcements/coronavirus-covid-19-update-fda-alerts-consumers-about-unauthorized-fraudulent-covid-19-test-kits) (last access: 24 June 2020).

650 49. Jiang S, Hillyer C, Du L. Neutralizing Antibodies against SARS-CoV-2 and Other Human Coronaviruses.  
651 Trends Immunol. 2020 Apr 2.

652 50. NATURE VIDEO. We test a home antibody kit for tracking Covid-19. Easy-to-use postal tests may be  
653 important for monitoring community transmission. 04 JUNE 2020. Available at:  
654 <https://www.nature.com/articles/d41586-020-01677-y> (last access: 24 June 2020).

655

## 656 **Supporting information**

657 **S1 Appendix. Paper-based instruction for use of the Exacto<sup>®</sup> COVID-19 self-test**  
658 **(Biosynex Swiss SA).**

659 **S2 Appendix. video-based instruction for use of the Exacto<sup>®</sup> COVID-19 self-test**  
660 **(Biosynex Swiss SA).**

661 **S3 Appendix. Study questionnaires in French (original language).**

662 **S4 Appendix. Study questionnaires in English.**

663

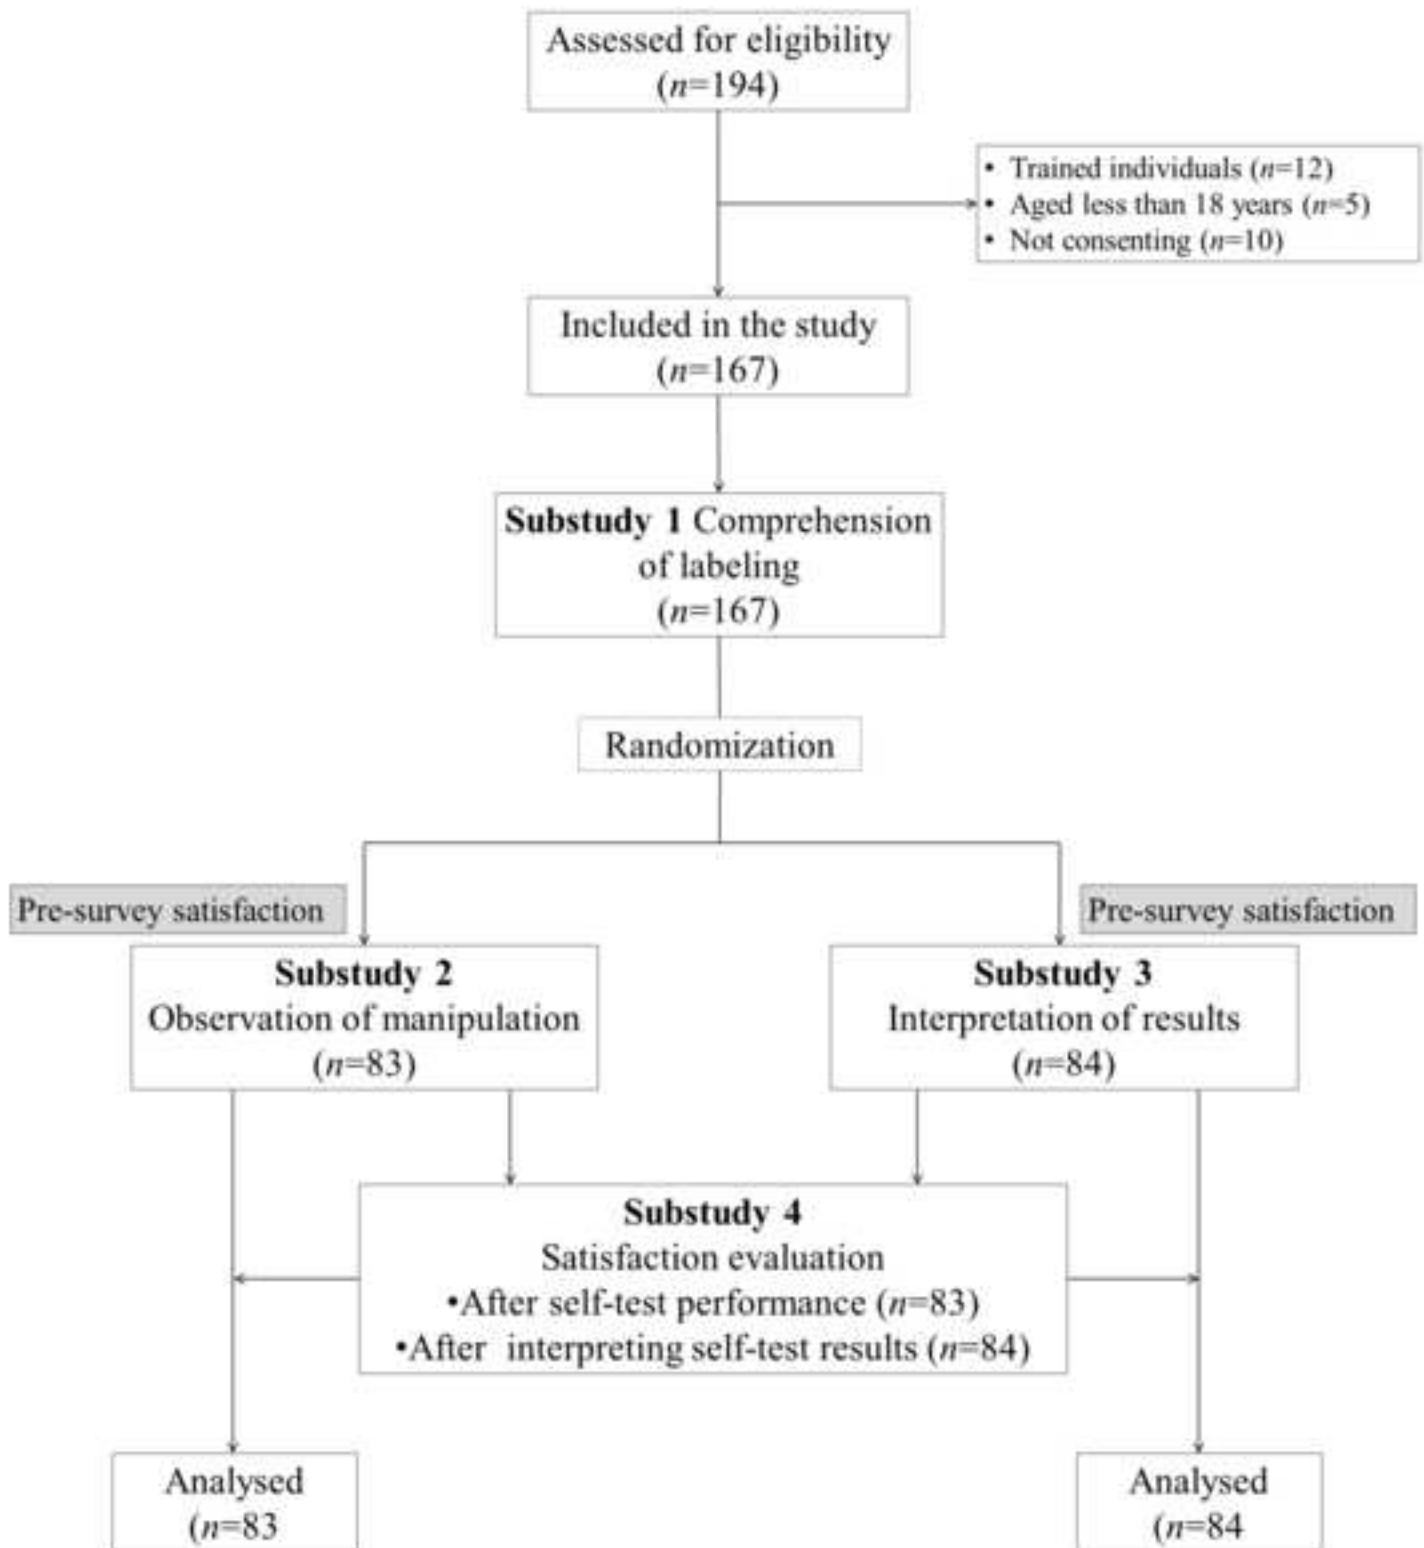

## A. Interpretation of test results

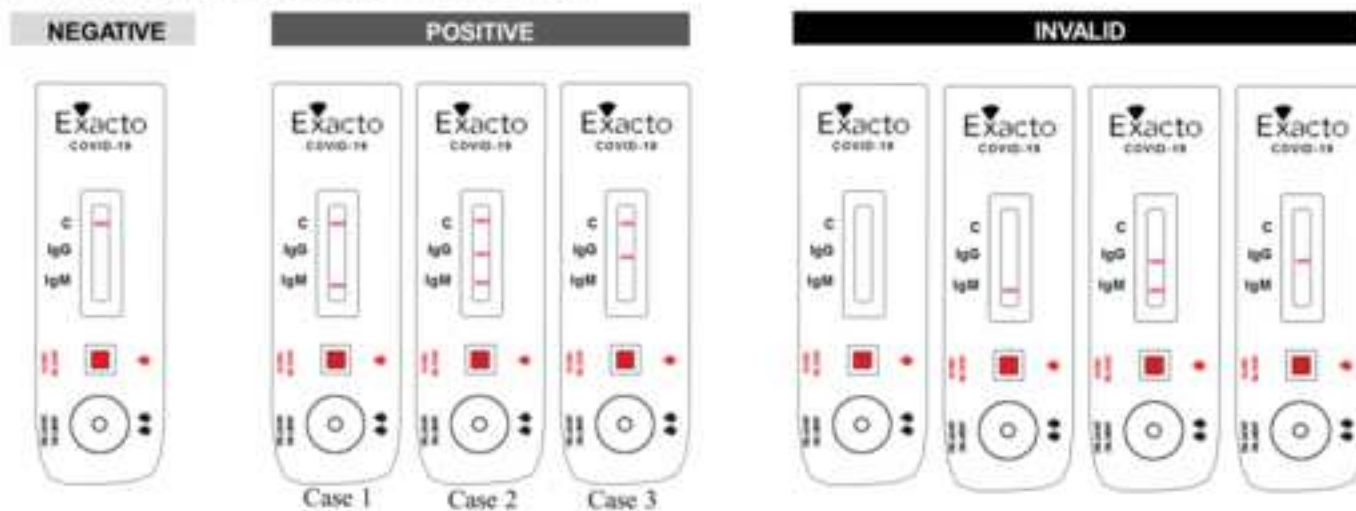

## B. Panel of eight standardized tests

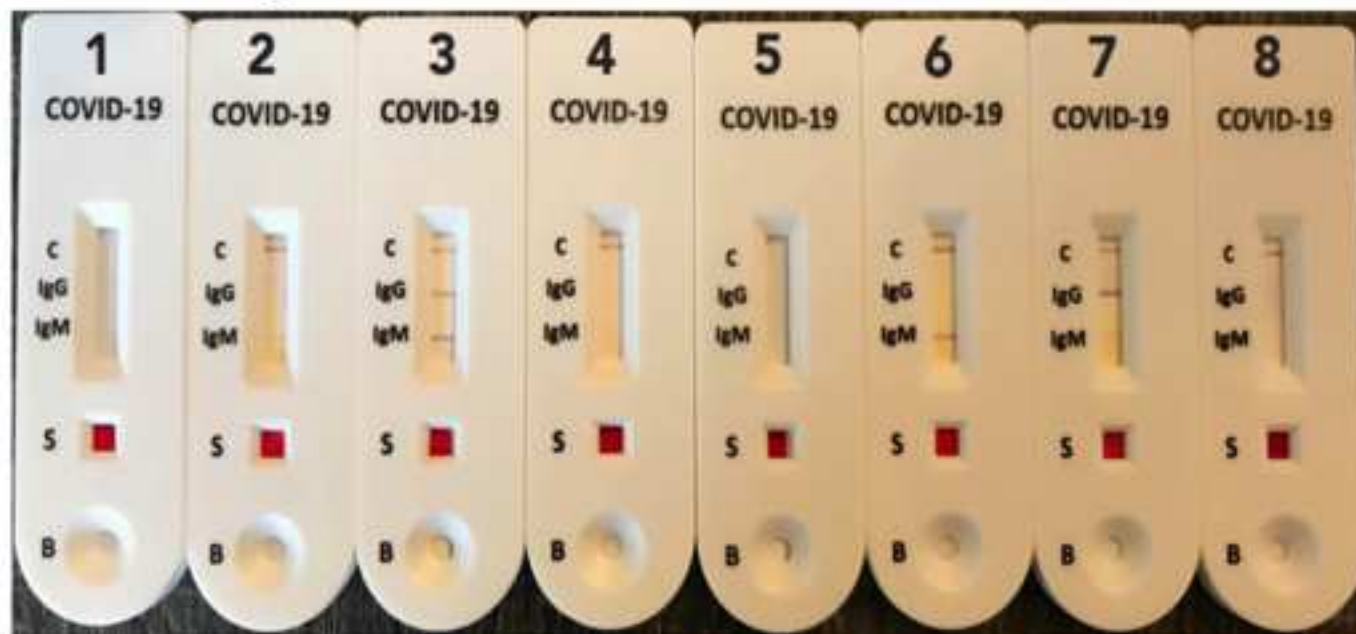

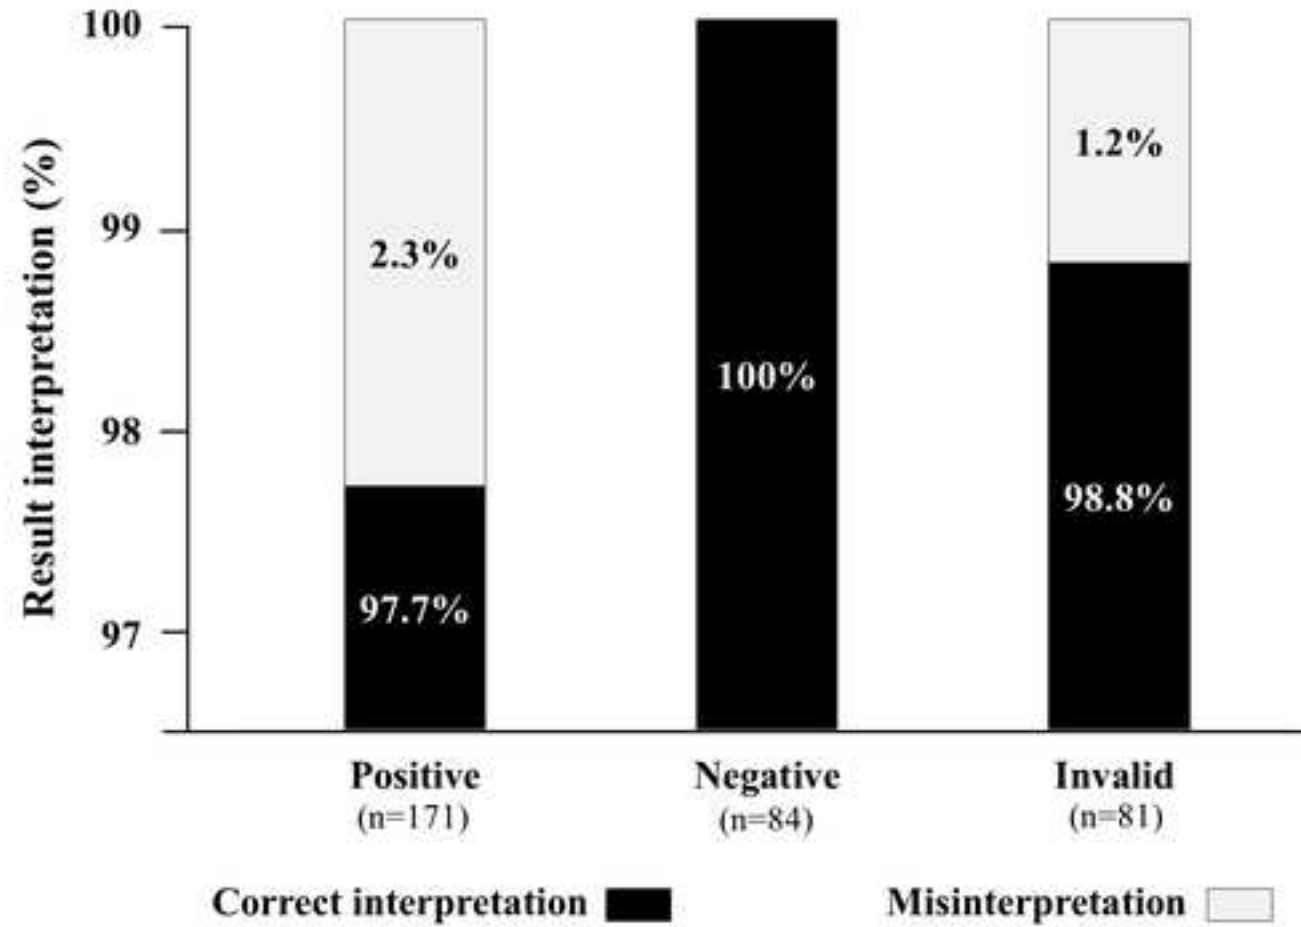

# Exacto COVID-19 SELF-TEST

## INTRODUCTION

Exacto COVID-19 self-test is a rapid immunochromatographic self-test for the qualitative detection of IgG and IgM antibodies against SARS-CoV-2 from a drop of capillary blood. The test consists of antigens specific to IgG and IgM antibodies of SARS-CoV-2. The self-test determines whether you have been in contact with the virus responsible for COVID-19.

COVID-19 is an acute respiratory illness caused by infection with SARS-CoV-2. SARS-CoV-2 belongs to the same family of viruses that cause Severe Acute Respiratory Syndrome (SARS). The most common symptoms of COVID-19 are fever, fatigue and a dry cough. Some patients may experience pain, nasal congestion, sore throat, diarrhea and loss of taste and smell. These symptoms are usually mild and begin gradually. Some people are infected but do not develop any symptoms. Most patients recover 90% to 95% from the disease without the need for hospital care.

The disease can be spread from person to person through small droplets emitted from the nose or mouth when a person infected with COVID-19 coughs or sneezes. Transmission through contact of contaminated hands with the face is common. Viruses can become concentrated after touching surfaces that carry the virus. The estimated incubation period for COVID-19 ranges from 1 to 14 days.

The Exacto COVID-19 self-test, based on antibody detection, can identify individuals who are unaware that they have been infected, either because they have never developed symptoms, or because they have symptoms that have never been properly diagnosed. This means that self-testing can identify silent infections, as well as persons who have been sick but have recovered. This self-test does not detect the presence of the virus responsible for COVID-19, but it does detect the response of a patient's immune system against the COVID-19 virus.

The Exacto COVID-19 self-test will give a positive result in the majority of cases within 11 days of the onset of symptoms. A negative result with Exacto COVID-19 that in a symptomatic individual does not exclude COVID-19 infection. If symptoms suggestive of COVID-19 are present, a negative result should be followed up with a serological test 10 days after the first test.

## KIT CONTENTS

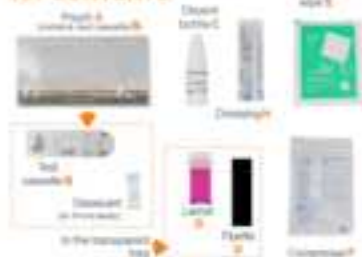

## TESTING GUIDELINES

- Wash your hands with warm water before and after the procedure. When using disposable gloves, use them properly.
- This can be your hand, using for about a minute along your body as the most blood can flow into it. It is recommended that you pinch your left hand for a right-handed person and your right hand for a left-handed person.
- If it is hard to pinch the fingers on the unit, this is where there is the most blood and the sensitivity is most acute when the skin is thin and therefore more difficult to pinch.
- If this happens that a drop does not fall right away in the case, you should wait a minute and massage over these lights from the base to the puncture hole.
- It is not necessary to form large drop of blood at the tip of your finger. The way the pipette will fill up with blood needs not quality.

# Instruction for use of the EXACTO COVID-19 SELF-TEST

## BLOOD COLLECTION

- 1 Please read the printed manual. Drawn you have a watch or a stopclock.
- 2 Wash your hands with soap and warm water and dry them before proceeding to the next step.
- 3 Open the box and remove all items from their packaging. Don't forget to remove the pipette and band from the bag. Place them on a clean, flat surface, ideally each item in the lid.
- 4 Tap the notch in front of the pipette. Remove carefully. Use the lid without contact.
- 5 Remove the cap of the blood filter. Insert pipette vertically on the seal surface.
- 6 Push the band. It should not be covered by the cap. It should be covered by the cap and pressure firmly by finger. The band and pipette will be together.
- 7 Wipe off signs of alcohol for complete dry.
- 8 Remove the cap of the sensors by pulling off.
- 9 Place the sensor. It should not be covered by the cap. It should be covered by the cap and pressure firmly by finger. The band and pipette will be together.

- 10 Expose the puncture fingertip strongly to form a large drop of blood at the tip.
- 11 The capillary is automatically inserted covered with the blood drop. Do not press or pull the plunger.
- 12 Fill pipette completely with blood up to the white stop.

## TEST PROCEDURE

- 12 Drop the contents of the pipette into the upper chamber and do not touch it by pressing the white pipette plunger.
- 13 Place 2 drops of blood in the round chamber and insert the cap. Leave your results on a flat surface.
- 14 Wait the stopwatch or note the time. Wait 10 minutes to read the result. Do not read beyond 20 minutes. During this time, you can apply the dressing in.

## PERFORMANCE

**Sensitivity and specificity**  
Exacto COVID-19 self-test was compared to the double-blind reference method. The double-blind 440 samples for IgG and IgM samples for IgG.

|     | Sensitivity | Specificity | Accuracy |
|-----|-------------|-------------|----------|
| IgG | 100%        | 98.5%       | 99.2%    |
| IgM | 91.5%       | 98.5%       | 97.5%    |

- A predictability study conducted with a human population showed that 100% of participants obtained a correct and interpretable result.  
- A reliability study confirmed that 98.1% of the different types of results were obtained correctly.

## INTERPRETATION

**NEGATIVE**

**POSITIVE**

PUT YOUR TEST HERE

**How to read the test results**  
The test results are read by observing the appearance of the control line (C) and the appearance of the test lines (T1 and T2).  
- A positive result is obtained when the control line (C) and the two test lines (T1 and T2) are visible.  
- A negative result is obtained when the control line (C) is visible and the two test lines (T1 and T2) are not visible.  
- A result is considered invalid when the control line (C) is not visible and the two test lines (T1 and T2) are not visible.  
- A result is considered invalid when the control line (C) is not visible and the two test lines (T1 and T2) are visible.

**The result is POSITIVE if 2 or 3 control lines appear on the test strip.**  
The control line (C) and the two test lines (T1 and T2) are visible. This indicates the presence of the virus responsible for COVID-19 in the person who has been tested.  
- A positive result is obtained when the control line (C) and the two test lines (T1 and T2) are visible.  
- A negative result is obtained when the control line (C) is visible and the two test lines (T1 and T2) are not visible.  
- A result is considered invalid when the control line (C) is not visible and the two test lines (T1 and T2) are not visible.  
- A result is considered invalid when the control line (C) is not visible and the two test lines (T1 and T2) are visible.

Five lines appear in the control zone (C) even if there is a band in the IgG and/or IgM zone. Exacto COVID-19 self-test is then **INVALID**. You should perform a new test.

- Do not interpret the Exacto COVID-19 self-test if it is not used in accordance with the instructions for use and the instructions for use of the Exacto COVID-19 self-test. The Exacto COVID-19 self-test will be used to perform a self-test or go to a laboratory or to your doctor.
- To ensure the quality of your test and its components, please refer to the rules in force in your country.

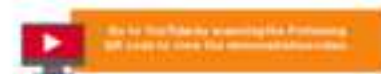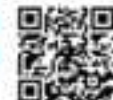

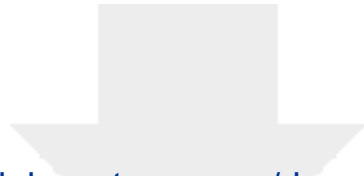

Click here to access/download  
**Supporting Information**  
COVID-19 EN V2.mp4

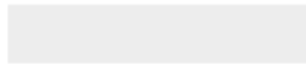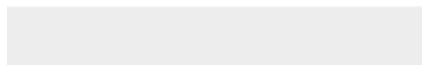



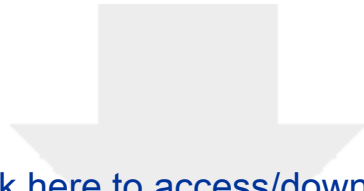

Click here to access/download

**Supporting Information**

S3 Appendix. Study questionnaires in French.DOC

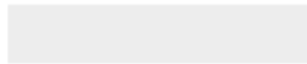



[Click here to access/download](#)

**Supporting Information**

[S4 Appendix. Study questionnaires in English.DOC](#)

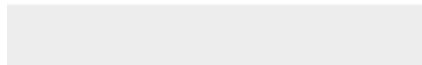

1  
2  
3 **Capillary whole-blood IgG-IgM COVID-19 self-test**  
4 **as a serological screening tool for SARS-CoV-2 infection**  
5 **adapted to the general public**  
6

7  
8 **Serge Tonen-Wolyec<sup>1,2</sup>, Raphaël Dupont<sup>3</sup>, Salomon Batina-Agasa<sup>2</sup>,**  
9 **Marie-Pierre Hayette<sup>4</sup>, Laurent Bélec<sup>5,6,\*</sup>**  
10

11  
12 <sup>1</sup>Ecole Doctorale Régionale D’Afrique Centrale en Infectiologie Tropicale, Franceville, Gabon;

13  
14 <sup>2</sup>Faculty of Medicine and Pharmacy, University of Kisangani, Kisangani, the Democratic Republic of the  
15 Congo;

16  
17 <sup>3</sup>BioSynex, Strasbourg, France;

18  
19 <sup>4</sup>Department of Clinical Microbiology, University Hospital of Liège, Liege, Belgium;

20  
21 <sup>5</sup>Laboratoire de Virologie, Hôpital Européen Georges Pompidou, Assistance Publique-Hôpitaux de Paris,  
22 Paris, France;

23  
24 <sup>6</sup>Université Paris Descartes, Sorbonne Paris Cité, Paris, France.  
25

26  
27  
28 \*Corresponding author: [laurent.belec@aphp.fr](mailto:laurent.belec@aphp.fr) (LB)  
29

Field Code Changed

Formatted: Hyperlink, Font: (Default) Times New Roman, English (United States)

30  
31  
32 **Author’s contribution.** STW, RD and LB conceived the study. RD performed the experiments,  
33 and collected data. STW analyzed the data and generated the figs. STW, MPH, SBA and LB  
34 supervised this study. All authors wrote and edited the manuscript.  
35

## 36 **Abstract**

37

38 The practicability of a prototype capillary whole-blood IgG-IgM COVID-19 self-test (Exacto®  
39 COVID-19 self-test, Biosynex Swiss SA, Freiburg, Switzerland) as a serological screening tool  
40 for SARS-CoV-2 infection adapted to the general public was evaluated in a cross-sectional,  
41 general adult population study performed between April and May 2020 in Strasbourg, France,  
42 consisting of face-to-face, paper-based, semi-structured, and self-administrated questionnaires.

43 Practicability was defined as the correct use of the self-test and the correct interpretation of the  
44 result. The correct use of self-test was conditioned by the presence of the control band after 15-  
45 min of migration. The correct interpretation of the tests was defined by the percent agreement  
46 between the tests results read and interpret by the participants compared to the expected results  
47 coded by the numbers and verified by trained observers. A total of 167 participants (52.7%

48 female; median age, 35.8 years; 82% with post-graduate level) were enrolled, including 83 and  
49 84 for usability and test results interpretation substudies, respectively. All participants (100%;  
50 95% CI: 95.6–100) correctly used the self-test. However, 12 (14.5%; 95% CI: 8.5–23.6) asked

51 for verbal help. The percent agreement between the tests results read and interpret by the  
52 participants compared to the expected results was Overall, 98.5% (95% CI: 96.5–99.4) test

53 results were correctly interpreted, while. However, misinterpretation occurred in only 2.3% of  
54 positive and 1.2% of invalid test results. Finally, all (100%) participants found that performing

55 the COVID-19 self-test was easy; and 98.8% found the interpretation of the self-test results  
56 easy. Taken together, these pilot observations demonstrated for the first-time, high

57 practicability and satisfaction of COVID-19 self-testing for serological IgG and IgM immune  
58 status, indicating its potential for use by the general public to complete the arsenal of available

59 SARS-CoV-2 serological assays in the urgent context of the COVID-19 epidemic.

60

## 61 **Introduction**

62

63 Severe acute respiratory syndrome coronavirus 2 (SARS-CoV-2), a novel coronavirus  
64 that causes Coronavirus Disease 2019 (COVID-19), started in the Wuhan province, China, in  
65 December 2019, and was declared by the World Health Organization (WHO) as global  
66 pandemic on March 11, 2020 [1-4]. Controlling the outbreak in the community and in hospitals  
67 mainly relied on the availability of highly sensitive and specific nucleic acid amplification-  
68 based molecular testing for SARS-CoV-2 [5,6]. Furthermore, it was demonstrated that  
69 serological testing looking for specific SARS-CoV-2 IgG and/or IgM may be useful for  
70 confirming the diagnosis and care of COVID-19 patients [7-9]. On March 2, 2020, the WHO  
71 recommended serological testing in addition of molecular diagnosis, for investigating on-going  
72 outbreaks as well as for the diagnosis of strongly suspected patients of SARS-CoV-2 infection  
73 with negative RT-PCR [10]. Furthermore, antibody tests for SARS-CoV-2 may constitute one  
74 of the keys to fight the SARS-CoV-2 epidemic, in particular to overcome the de-confinement  
75 period [9]. Seropositivity to SARS-CoV-2 antigens would also allow to identify previously  
76 infected individuals, including asymptomatic patients, *a priori* considered to be healed and  
77 protected against new reinfection [9].

78 Recently, rapid lateral flow assays for IgG and IgM antibodies produced during the  
79 COVID-19 epidemic have been developed [11]. Several reports have shown that COVID-19  
80 IgG/IgM lateral flow immunoassays may be a reliable tool to diagnose SARS-CoV-2 infection  
81 from 14 days of onset of symptoms [12,13]. In some countries, rapid diagnostic testing for  
82 COVID-19 has been incorporated into the local guidelines for testing asymptomatic contacts of  
83 positive cases, at day 14 of home surveillance [14]. These easy to use IgG-IgM combined tests  
84 allow rapid screening with capillary blood samples. The tests are simple, qualitative, visually  
85 interpretable, and give a result within 10 to 15 minutes. A positive serology allows to determine

86 whether a person has already been infected by SARS-CoV-2. Serologic tests will be needed to  
87 assess the response to vaccine candidates and to map levels of immunity in communities. These  
88 rapid tests could be particularly interesting for developing countries for testing patients at the  
89 bedside or any other locations where laboratory facilities are lacking.

90 HIV self-testing constitutes a novel innovative approach to make testing more  
91 accessible, confidential, and available at non-traditional venues, such as pharmacies and  
92 community venues, as well as in the home, as it offers a discreet, convenient, and empowering  
93 way to test [15,16]. HIV self-testing has demonstrated high acceptability with very convenient  
94 usability in various adolescent and adult ~~profane~~ populations from developed as [well as](#)  
95 resources-constrained settings [17-21].

96 To our knowledge, there is no currently reported experience in the literature about self-  
97 testing for SRAS-CoV-2 infection. Based on our own experience of HIV self-testing evaluation,  
98 we herein aimed at evaluating the practicability of a prototype capillary whole-blood IgG-IgM  
99 COVID-19 self-test as a serological screening tool for SARS-CoV-2 infection adapted to the  
100 general public.

101

## 102 **Material and methods**

103

104 **Prototype SARS-CoV-2 test for self-testing.** The prototype capillary whole-  
105 blood IgG/IgM SARS-CoV-2 self-test (Exacto<sup>®</sup> COVID-19 self-test, Biosynex Swiss SA,  
106 Freiburg, Switzerland) was adapted from the CE IVD-labeled finger-stick whole-blood rapid  
107 diagnostic test for IgG and IgM antibodies against SARS-CoV-2 detection (BIOSYNEX<sup>®</sup>  
108 COVID-19 BSS [IgG/IgM], Biosynex Swiss SA), by re-packaging for individual use with the  
109 addition of seven components placed in a pouch containing the test cassette, diluent vial,  
110 pipette, alcohol wipe, compress, lancet and dressing. The Exacto<sup>®</sup> COVID-19 self-test

111 (Biosynex Swiss SA) consists of visually read, qualitative, *in vitro* lateral flow immunoassays  
112 for the detection of IgG and IgM antibodies to SARS-CoV-2 in human whole blood, serum, or  
113 plasma as an aid in the diagnosis of SARS-COV-2 infection. The targeted protein is the  
114 receptor-binding domain (RBD) of the spike surface protein of SARS-CoV-2. During testing,  
115 the specimen reacts with SARS-CoV-2 antigen-coated particles in the test cassette. The mixture  
116 then migrates upward on the membrane chromatographically by capillary action and reacts with  
117 the anti-human IgG in the IgG test line region or/and with the anti-human IgM in the IgM line  
118 region. The quantity of blood needed to perform the test is 10 µL.

119 The analytical performances of the BIOSYNEX® COVID-19 BSS (IgG/IgM) (Biosynex  
120 Swiss SA) were evaluated during the COVID-19 epidemic in *Grand Hôpital de l'Est francilien*,  
121 Jossigny, France, using two serum sample panels obtained from patients with COVID-19  
122 confirmed by positive nucleic acid amplification-based diagnosis at least 14 days after  
123 symptoms onset and from patients randomly selected for whom serum samples were collected  
124 before the COVID-19 epidemic (from October 1 to November 30, 2019) (instructions for use  
125 2020). The BIOSYNEX® COVID-19 BSS (IgG/IgM) (Biosynex Swiss SA) showed sensitivity  
126 of 97.4% and specificity of 100%, demonstrating high analytical performances allowing  
127 convenient management of suspected on-going and past-infections. Furthermore, this rapid  
128 diagnostic test is recommended for both SARS-CoV-2-specific IgG and IgM detection by the  
129 French Ministry of Health [22], following an official report from the National Reference Center  
130 for Respiratory Viruses [Centre National de Référence Virus des infections respiratoires (dont  
131 la grippe)], Institut Pasteur, Paris, because the test fulfilled the criteria of the minimal analytical  
132 performances [*i.e.* minimum sensitivity of 90% (or even 95%) and minimum specificity of  
133 98%] of serological tests detecting the antibodies directed against SARS-CoV-2, defined on  
134 April 16, 2020 by the so-called *Haute Autorité de Santé* [23]. The simplified instructions for  
135 use of the Exacto® COVID-19 self-test (Biosynex Swiss SA) comprised an easy-to-read leaflet

Formatted: Font: Italic

136 in French and English, in A3 format color printing. As an example, the [paper-based and video-](#)  
137 [based](#) instructions for use are depicted [as S1 and S2 appendix in Fig 1. The online instruction in](#)  
138 [the video for use was available online from Youtube \[24\].](#)

139  
140 [Fig 1. Instructions for use of the Exacto<sup>®</sup>-COVID-19 self-test \(Biosynex Swiss SA\) designed](#)  
141 [for the general public using typical pictures representative of the principal steps of the](#)  
142 [manufacturer's instructions with explanations written.](#)

143  
144 **Study design and recruitment of participants.** The practicability evaluation  
145 of the Exacto<sup>®</sup> COVID-19 self-test (Biosynex Swiss SA) is a cross-sectional study, [consisting](#)  
146 [of face-to-face, paper-based, semi-structured, and self-administrated questionnaires. This](#)  
147 [survey was](#) performed between April and May 2020 by home-based recruitment of adult  
148 volunteers using a door-to-door community approach, in 15 neighborhoods of Strasbourg and  
149 its suburbs, France. [Due to the limited movement during the confinement period in France,](#)  
150 [especially in the province of Alsace \(now “Grand Est”\) for which Strasbourg is the capital city,](#)  
151 [the choice of these neighborhoods and its suburbs was based on their easy accessibility and](#)  
152 [their high prevalence of reported cases of SARS-CoV-2 infection \[24\]., consisting of face to-](#)  
153 [face, paper based, semi structured, and self administrated questionnaires. Strasbourg is the](#)  
154 [capital city of the Grand Est province, which was one of the regions affected the most by the](#)  
155 [SARS-CoV-2 epidemic in France \[25\].](#)

156 All participants accepted voluntarily to be included. Eligible participants had an age  $\geq$   
157 18 years, wanted to know their SRAS-CoV-2 serology status, were capable to speak and read  
158 in French, and gave their consent to participate in the study. All trained individuals (physicians,  
159 nurses, and biologist) in rapid diagnostic tests were excluded. Informed written consent was



160 signed by all participants. Ethical approval for this study was obtained from the local scientific  
161 committee of Parc de l’Innovation, Strasbourg, France.

162

163 **Practicability study outcomes.** The practicability evaluation was divided into four  
164 substudies carried out by trained health care professionals, based on previously acquired  
165 experience from WHO recommendations for evaluating the practicability of HIV self-tests  
166 [17,18,256]. Indeed, the practicability was defined as the correct use of the self-test and the  
167 correct interpretation of the result. The correct use of self-test was conditioned by the presence  
168 of the control band after 15-min of migration. The correct interpretation of the tests was defined  
169 by the percent agreement between the tests results read and interpret by the participants  
170 compared to the expected results coded by the numbers and verified by trained observers. As  
171 depicted in the Fig 12, all participants were included in substudy 1 concerning the  
172 understanding of labeling, while they were randomized into two groups for substudy 2  
173 concerning manipulation of the test and substudy 3 evaluating the interpretation of COVID-19  
174 self-test results, using block randomization of 4. Participants in sub-study 4 were each drawn  
175 from the satisfaction questionnaires for substudies 2 and 3.

176

177 **Fig 12.** Flow chart showing the recruitment of study participants, their randomization, and  
178 affiliation for each substudy.

179

180 **Data collection and procedures.** Paper-based, self-administered, and structured  
181 questionnaires were used to obtain the data on the socio-demographic characteristics, medical  
182 history of study participants, participants’ understanding of the instructions for use, and  
183 participants’ opinions or levels of satisfaction about the practicability of the Exacto® COVID-

184 19 self-test (Biosynex Swiss SA). All data related to the observation of manipulation and the  
185 interpretation of test results were recorded on the standardized sheets by the observers.

186 **Substudy 1. Comprehension of labeling.** After receiving a brief explanation of  
187 the objectives and conduct of the study, the participants were asked to sign the informed consent  
188 form. In a private setting, the participants had the choice between a paper-based instruction for  
189 use and a video-based instruction for use, which they were asked to read or watch and  
190 understand independently. After their self-declaration of having understood the instruction for  
191 use, the participants were asked to fill a questionnaire to gauge their comprehension. To this  
192 end, 10 questions restating the key information with closed answers (true, false, or don't know)  
193 were asked by the observer on the followings items: 1. Identification of each component of the  
194 kit; 2. Manipulation of blood sampling device; 3. Diluent deposit; 4. Possession of a timer; 5.  
195 Interpretation of a positive test result; 6. Interpretation of a negative test result; 7. Diagnosis of  
196 an invalid test result; 8. Reliability of self-test result; 9. Meaning of a positive result; and 10.  
197 Detection of the virus. The participants who correctly answered all 10 questions were  
198 considered to have correctly understood the instructions for use.

199 After this survey, participants were randomized in two groups for evaluation on  
200 performing the self-test and the interpretation of test results. In order to achieve this, a sealed  
201 randomization envelope was used sequentially. In each group, before starting the survey, a pre-  
202 test satisfaction questionnaire was completed by the participants.

203 **Substudy 2. Observation of manipulation.** In a private setting supervised by  
204 an observer, each participant received a box containing the Exacto<sup>®</sup> COVID-19 self-test  
205 (Biosynex Swiss SA). Participants were then asked to carry out the self-test by themselves in  
206 front of a trained observer. The observer was responsible for recording the respect or not of  
207 each step, ~~appeal for~~provide verbal assistance (mimicking telephone support), difficulty, and  
208 errors on a standardized sheet. The successful performance of the SARS-CoV-2 self-test was

209 conditioned by the presence of the control band on test strip, and the test results were read and  
 210 recorded independently by both the participants and the observers. Note that, all individuals  
 211 with a positive serological result were referred to the laboratory for diagnostic confirmation and  
 212 to the hospital for management.

213 **Substudy 3. Interpretation of test results.** In a private setting supervised by an  
 214 observer, eight standardized test results including four positive tests (one weak positive for  
 215 IgM, one clearly positive for IgM, one clearly positive for IgG but weak positive for IgM, and  
 216 one clearly positive for IgM and IgG), two negative tests, and two invalid tests were ~~proposed~~  
 217 ~~provided~~ to the participants for interpretation after ~~successive~~ random selection of four tests  
 218 (Fig 23). These standardized tests were coded by numbers to determine the expected results.

220 **Fig 23. Interpretation of self-test results. A.** The self-test result was interpreted as negative  
 221 when a Control line (C) was present and readable and the “IgG” and “IgM” lines were absent.  
 222 It was positive when a “C” and “IgM” (clearly or poorly readable) (case 1), or “C” and “IgG”  
 223 or “C”, “IgM” (clearly or poorly readable), and “IgG” lines were presents. AndFinally, it was  
 224 invalid when the “C” line was absent regardless of the presence or absence of the “IgG” and/or  
 225 “IgM” line. B. Panel of 8 Exacto® COVID-19 self-test (Biosynex Swiss SA) cassettes,  
 226 including 4 positive tests (~~#n°2~~, ~~#n°3~~, ~~#n°6~~ and ~~#n°7~~), 2 negative tests (~~#n°4~~ and ~~#8n°7~~) and  
 227 2 invalid tests (~~#n°1~~ and ~~#n°5~~). The ~~#n°2~~ and ~~#3n°7~~ are weakly positive for IgM. Each volunteer  
 228 ~~randomly~~~~successively~~ drew 4 tests among a panel of 8 and interpreted them with the help of  
 229 the reading and interpretation scale. The observer noted the number of the drawn test and the  
 230 result given by the participant.

231  
 232 **Substudy 4. Satisfaction questionnaire.** Finally, the participants fulfilled the  
 233 satisfaction questionnaire concerning their experiences with the COVID-19 self-test including

Formatted: Font: Bold

Formatted: Font: Bold

Formatted: Font: Bold

234 understanding of instructions for use, the identification of the different components of the kit,  
235 the sample collection and transfer, the overall performance of the self-test, the reading and  
236 interpretation of test results, and the ability to overcome the difficulties encountered.

237

238 **Statistical analysis.** All data were entered into an Excel file and analyzed on SPSS 20.0  
239 (Chicago, IL). Descriptive statistics were computed using mean (standard deviation) or median  
240 (interquartile range) for normal or skewed distribution, respectively, then, proportions of all  
241 categorical variables were calculated for qualitative data. The labeling index for understanding  
242 and usability index were defined as the mean of the correct answers for each question related  
243 to the understanding of instructions for use and performing of the COVID-19 self-test,  
244 respectively. The Wilson score bounds were used to estimate the 95% confidence intervals (CI).  
245 Cohen's  $\kappa$  coefficient estimated the concordance between the results read by participants in  
246 connection with the expected results [267]. The degree of agreement was determined as ranked  
247 by Landis and Koch [278]. The comparison of data from the post-test satisfaction questionnaire  
248 paired to those from the pre-test satisfaction questionnaire was performed by using Mac  
249 Nemar's chi-squared pairing test.

250

## 251 **Results**

252

253 **Study population.** A total of 194 individuals were assessed for eligibility, but 27 were  
254 excluded because they were trained (n=12), less than 18 years old (n=5), ~~and or~~ not consenting  
255 (n=10). Finally, 167 were successfully enrolled in the study (substudies 1 and 4), and among  
256 them, 83 were assigned after randomization in substudy 2 and 84 in substudy 3 (Fig 12). The  
257 demographic characteristics and medical history of study participants are shown in Table 1.

258 Overall, 88 (52.7%) were female. The mean age was 38.6 (SD: 13.8) years, and around one half  
 259 of participants were aged between 18 and 39 years. The majority (82.0%) of participants had  
 260 post-graduate education level. The majority (59.3%) had reported no symptoms of COVID-19  
 261 in the past two months. Approximately one fifth of participants had previously been screened  
 262 for SARS-CoV-2 infection by molecular testing of nasopharyngeal swab, of whom 13.4% had  
 263 a positive result (Table 1).

264

265 **Table 1.** The demographic characteristics and medical history of the 167 study participants.

| Variable                                                                             | Items               | Number (%)  |
|--------------------------------------------------------------------------------------|---------------------|-------------|
| <b>Sex</b>                                                                           |                     |             |
|                                                                                      | Male                | 79 (47.3)   |
|                                                                                      | Female              | 88 (52.7)   |
| <b>Age (years)</b>                                                                   |                     |             |
|                                                                                      | 18 – 39             | 88 (52.7)   |
|                                                                                      | ≥ 40                | 79 (47.3)   |
|                                                                                      | Mean (SD)           | 38.6 (13.8) |
| <b>Educational level</b>                                                             |                     |             |
|                                                                                      | College level       | 14 (8.4)    |
|                                                                                      | High school level   | 16 (9.6)    |
|                                                                                      | Post-graduate level | 137 (82.0)  |
| <b>Had the symptoms of COVID-19 in the past two months<sup>#</sup></b>               |                     |             |
|                                                                                      | Yes                 | 68 (40.7)   |
|                                                                                      | No                  | 99 (59.3)   |
| <b>Previous COVID-19 molecular testing (nasopharyngeal swab)</b>                     |                     |             |
|                                                                                      | Yes                 | 34 (20.4)   |
|                                                                                      | No                  | 133 (79.6)  |
| <b>Previously diagnosed COVID-19 positive among those previously COVID-19 tested</b> |                     |             |
|                                                                                      | Yes                 | 22 (13.2)   |
|                                                                                      | No                  | 145 (86.8)  |

266 <sup>#</sup> Participants who reported having at least one of the following major symptoms associated or not with minor symptoms were  
 267 considered to have the COVID-19 symptom: fever, fatigue, dry cough, anosmia and dyspnea. Minor symptoms were: pain, nasal  
 268 congestion, runny nose, sore throat or diarrhea.

269

270 COVID-19: Coronavirus disease 2019; RT-PCR: Reverse transcription-polymerase chain reaction; SD: Standard deviation.

271

272 **Substudy 1.** This substudy evaluated the ability of the 167 study participants to understand  
 273 the instructions for use of the Exacto® COVID-19 self-test (Biosynex Swiss SA). A large  
 274 majority ( $n=155$ ; 92.8%) of participants preferred to use the paper-based instructions whereas  
 275 only 12 (7.2%) participants used the video-based instructions. The analytical results of the  
 276 evaluation questionnaire are shown in Table 2. Overall, 149 (89.2%; 95% CI: 83.6–93.1)  
 277 participants correctly understood the instructions for use, thus correctly answering all 10  
 278 questions. The labeling index for understanding measuring the mean of the correct answers for  
 279 each question was 97.1% (95% CI: 93.3–98.8). The question concerning the non-detection of  
 280 the virus (SARS-CoV-2) by the self-test showed the highest rate (10.2%) of incorrect response.

281  
 282 **Table 2.** Analytical results of the evaluation questionnaire concerning the ability of the 167 study  
 283 participants to understand the instruction for use of the Exacto® COVID-19 self-test (Biosynex Swiss SA)  
 284 (substudy 1). The questions raising specific issues concerning the manipulation of the kit, the interpretation  
 285 of test results, and the consequence of test results, were asked by the observer and the answers were closed.

| Comprehension of labeling checklist*                                                                                                                 | Participants' responses |                       |                            |
|------------------------------------------------------------------------------------------------------------------------------------------------------|-------------------------|-----------------------|----------------------------|
|                                                                                                                                                      | True<br>[number (%)]    | False<br>[number (%)] | Don't know<br>[number (%)] |
| Q1: "A capital letter is associated with each component of the kit to better identify it during the performance of self-test"                        | 166 (99.4)              | -                     | 1 (0.6)                    |
| Q2: "The blood collection device (lancet) helps to collect the blood and transfer it immediately into the SQUARE well of self-test with the pipette" | 165 (98.8)              | 1 (0.6)               | 1 (0.6)                    |
| Q3: "Two drops of diluent should be placed in the same well as the drop of blood"                                                                    | 2 (1.2)                 | 163 (97.6)            | 2 (1.2)                    |
| Q4: "A timer (watch or mobile) to clock 10 minutes before reading the result is need"                                                                | 167 (100)               | -                     | -                          |
| Q5: "Presence of a readable strip next to IgM and/or IgG on the self-test cassette means that the test is positive"                                  | 166 (99.4)              | 1 (0.6)               | -                          |
| Q6: "Lack of band by test results is interpreted as a negative test"                                                                                 | 4 (2.4)                 | 162 (97.0)            | 1 (0.6)                    |
| Q7: "Lack of control band by test results should be interpreted as an invalid test"                                                                  | 167 (100)               | -                     | -                          |
| Q8: "Having symptoms less than 10 days before the test does not provide a reliable result"                                                           | 157 (94.0)              | 7 (4.2)               | 3 (1.8)                    |
| Q9: "If the test is positive it means that they have been in contact with the virus"                                                                 | 163 (97.6)              | 3 (1.8)               | 1 (0.6)                    |
| Q10: "The Exacto® COVID-19 self-test does not detect the presence of the virus"                                                                      | 148 (88.6)              | 17 (10.2)             | 2 (1.2)                    |
| <i>Labeling index for understanding (% [95% CI])<sup>‡</sup></i>                                                                                     | 97.1 [93.3–98.8]        |                       |                            |

|                                                                                     |                       |
|-------------------------------------------------------------------------------------|-----------------------|
| <i>Correct understanding of the instruction for use (n; % [95% CI])<sup>#</sup></i> | 149; 89.2 [83.6–93.1] |
|-------------------------------------------------------------------------------------|-----------------------|

286 \*Overall, 155 (92.8%) participants preferred to use the paper-based instruction whereas only 12 (7.2%) participants used the video-based  
287 instruction;

288 <sup>‡</sup> The labeling index for understanding was defined as the mean of the correct answers for each question;

289 <sup>#</sup> The participants who correctly answered all 10 questions were considered to have correctly understood the instructions for use.

290

291 CI: Confidence interval; COVID-19: Coronavirus disease 2019; Q: Question.

292

293 **Substudy 2.** This substudy evaluated the ability of participants to use the Exacto<sup>®</sup> COVID-  
294 19 self-test (Biosynex Swiss SA) in a supervised setting. The results of the questionnaire are  
295 shown in Table 3. Overall, all participants (100%; 95% CI: 95.6–100) performed the self-test  
296 and succeeded in obtaining a valid test result with an overall usability index of 98.5% (95% CI:  
297 93.0–99.7). Seventy (83.1%; 95% CI: 75.0–90.6) participants correctly used the self-test  
298 without any difficulties, errors, and help, whereas 12 (14.5%; 95% CI: 8.5–23.6) had asked for  
299 verbal help. The identification of the different components of the kit, the use of the lancet and  
300 pipette, and the transfer of blood were the steps requiring the most frequent verbal help in 1.2%,  
301 2.4%, 8.4%, and 2.4%, respectively (Table 3). Interestingly, all participants (n=6; 7.2%) using  
302 the video instructions performed the self-test easily (usability index of 100%) without any  
303 difficulties, errors, and help. Overall, the mean time of ~~HIV~~ self-test performance (since the  
304 opening of the box until the migration step) was 8.8 (SD: 3.0) minutes. [Note that, in this  
305 substudy, 11 \(13.3%\) people had a positive results with the self-test, and they were oriented to  
306 laboratory for result confirmation.-](#)

307

308 **Table 3.** Analytical results of the manipulation observation concerning the ability of the randomly selected  
309 83 study participants to correctly use each step of the Exacto<sup>®</sup> COVID-19 self-test (Biosynex Swiss SA)  
310 autonomously or with verbal help (substudy 2).

|  | Successful manipulation | Need |
|--|-------------------------|------|
|--|-------------------------|------|

| Usability checklist*                                                                                                  |                      |                    | for verbal help     |
|-----------------------------------------------------------------------------------------------------------------------|----------------------|--------------------|---------------------|
|                                                                                                                       | Yes<br>[number (%)]  | No<br>[number (%)] | Yes<br>[number (%)] |
| 1. Did the participant read the instruction for use?                                                                  | 83 (100)             | -                  | -                   |
| 2. Did the participant easily identify the different components of the kit?                                           | 82 (98.8)            | 1 (1.2)            | 1 (1.2)             |
| 3. Did the participant wash his hands?                                                                                | 83 (100)             | -                  | -                   |
| 4. Did the participant properly remove the test cassette from the aluminum pouch?                                     | 81 (97.6)            | 2 (2.4)            | -                   |
| 5. Did the participant open the diluent vial correctly?                                                               | 83 (100)             | -                  | -                   |
| 6. Did the participant disinfect his finger correctly?                                                                | 83 (100)             | -                  | -                   |
| 7. Did the participant wipe residual alcohol with the compress?                                                       | 82 (98.8)            | 1 (1.2)            | -                   |
| 8. Did the participant have difficulty lancing their finger?                                                          | 2 (2.4)              | 81 (97.6)          | 2 (2.4)             |
| 9. Did the participant have difficulty forming a blood droplet?                                                       | 1 (1.2)              | 82 (98.8)          | -                   |
| 10. Did the participant have difficulty using the pipette correctly until it was filled up to the blank line?         | 7 (8.4)              | 76 (91.6)          | 7 (8.4)             |
| 11. Did the participant correctly transfer and deposit the blood into the SQUARE well of the test cassette?           | 81 (97.6)            | 2 (2.4)            | 2 (2.4)             |
| 12. Did the participant shed two drops of diluent in the ROUND well of the test cassette?                             | 83 (100)             | -                  | -                   |
| 13. Did the Participant obtain an interpretable result at the end of the process despite a missed or incorrect step?# | 83 (100)             | -                  | -                   |
| <i>Usability index and overall need for help (% [95% CI])<sup>‡</sup></i>                                             | 98.5 [93.0–99.7]     |                    | 14.5 [8.5–23.6]     |
| <i>Correct use without difficulties, errors, and helps (n; % [95% CI])</i>                                            | 70; 83.1 [75.0–90.6] |                    |                     |
| <i>Average time of manipulation (minutes [SD])</i>                                                                    | 8.8 [3.0]            |                    |                     |

311 \* 6 (7.2) participants had used the video-based instruction for use; among them the usability index was estimated to 100% without any

312 difficulties, errors, and help;

313 #The result was considered interpretable when a control strip was readable after the migration time recommended by the manufacture r;

314 in the present series, 11 (13.3%) participants had a positive self-test result;

315 ‡ The usability index was defined as the mean of the correct answers for each question.

316

317 CI: Confidence interval; SD: Standard deviation.

318

319

320 **Substudy 3.** This substudy evaluated the ability of participants to read and interpret the

321 COVID-19 self-test results after successive-random selection of four tests from a panel of eight

322 standardized tests. The results are depicted in Fig 34. Overall, 336 standardized tests were read

323 and interpreted by the 84 participants, including 171 positive, 84 negative, and 81 invalid test

324 results. A total of 331 (98.5%; 95% CI: 96.5–99.4) tests were correctly interpreted, whereas 5

325 (1.5%; 95% CI: 0.6–3.5) tests were misinterpreted. Misinterpretation occurred in 2.3% (n=4)



326 of positive tests (all tests were weakly positive for IgM tests falsely interpreted as negative) and  
327 in 1.2% (n=1) of invalid tests falsely interpreted as negative. Cohen's  $\kappa$  coefficient between the  
328 results of reading by participants and the expected results was 0.98, demonstrating an excellent  
329 concordance.

330

331 **Fig 34.** Stacked columns showing the ability of participants to read and interpret (correctly or  
332 incorrectly) the 336 results of the Exacto<sup>®</sup> COVID-19 self-test (Biosynex Swiss SA) obtained  
333 from successive random selection of a panel of 8 standardized tests, including four positive,  
334 two negative, and two invalid test results.

335

336 **Substudy 4.** This substudy assessed the pre-test and post-test satisfaction of participants  
337 concerning the instructions for use (substudy 1), performing the COVID-19 self-test (substudy  
338 2), and the interpretation of test results (substudy 3). The results of the questionnaire are shown  
339 in Table 4. The understanding of the instructions for use of the self-test was considered easy in  
340 pre-test satisfaction questionnaire as well as in post-test period (100% *versus* 97.6%; not  
341 significant). However, 92.8% of participants found that the sample collection was very easy in  
342 pre-test satisfaction questionnaire whereas this satisfaction decreased after self-testing to  
343 71.1%, yielding a difference of -21,7 (95% CI: -31.7 to -11.7;  $P < 0.001$ ). Similar decrease was  
344 observed with the satisfaction of sample transfer (81.2% *versus* 60.2%; difference: -21.0%  
345 [95% CI: -30.9 to 11.1];  $P < 0.001$ ). Concerning the interpretation of test results, the participants  
346 found it easy in pre-test satisfaction questionnaire as well as in post-test period (100% *versus*  
347 98.8%; not significant). Finally, when asked about the ability to surmount the difficulties  
348 encountered during COVID-19 self-testing, all (100%) participants found it easy (97.0% very  
349 easy; 3.0% rather easy).

350

351 **Table 4.** Items and results of the pre-test and post-test satisfaction questionnaire and concerning the  
 352 instruction notice (substudy 1), the performing of the Exacto COVID-19 self-test (Biosynex Swiss SA)  
 353 (substudy 2), and the interpretation of test results (substudy 3).

| Satisfaction questionnaire                                                                    | Pre-test satisfaction<br>[number (%)] | Post-test satisfaction<br>[number (%)] | Difference*<br>% [95% CI] | P-value# |
|-----------------------------------------------------------------------------------------------|---------------------------------------|----------------------------------------|---------------------------|----------|
| How did you find the understandability of instructions for use of self-test? (N=167)          |                                       |                                        |                           |          |
| Very easy                                                                                     | 156 (93.4)                            | 153 (91.6)                             | -1.8 (-5.1 to +1.5)       | NS       |
| Rather easy                                                                                   | 11 (6.6)                              | 10 (6.0)                               | -0.6 (-3.3 to +2.1)       | NS       |
| Rather difficult                                                                              | 0 (0)                                 | 2 (1.2)                                | +1.2 (-1.8 to +4.2)       | NS       |
| Very difficult                                                                                | 0 (0)                                 | 2 (1.2)                                | +1.2 (-1.8 to +4.2)       | NS       |
| How did you find the identification of the different components of the self-test kits? (N=83) |                                       |                                        |                           |          |
| Very easy                                                                                     | 81 (97.6)                             | 80 (96.4)                              | -1.2 (-6.5 to +4.3)       | NS       |
| Rather easy                                                                                   | 2 (2.4)                               | 3 (3.6)                                | +1.2 (-4.1 to +6.5)       | NS       |
| Rather difficult                                                                              | 0 (0)                                 | 0 (0)                                  | -                         | NA       |
| Very difficult                                                                                | 0 (0)                                 | 0 (0)                                  | -                         | NA       |
| How did you find the sample collection? (N=83)                                                |                                       |                                        |                           |          |
| Very easy                                                                                     | 77 (92.8)                             | 59 (71.1)                              | -21.7 (-31.7 to -11.7)    | <0.001   |
| Rather easy                                                                                   | 5 (6.0)                               | 20 (24.1)                              | +18.1 (+11.3 to +27.7)    | <0.001   |
| Rather difficult                                                                              | 0 (0)                                 | 1 (1.2)                                | +1.2 (-4.1 to +6.5)       | NS       |
| Very difficult                                                                                | 1 (1.2)                               | 3 (3.6)                                | +2.4 (-3.5 to 8.3)        | NS       |
| How did you find the sample transfer? (N=83)                                                  |                                       |                                        |                           |          |
| Very easy                                                                                     | 68 (81.2)                             | 50 (60.2)                              | -21.0 (-30.9 to 11.1)     | <0.001   |
| Rather easy                                                                                   | 14 (16.9)                             | 25 (30.1)                              | +13.2 (+4.3 to +22.1)     | 0.043    |
| Rather difficult                                                                              | 0 (0)                                 | 2 (2.4)                                | +2.4 (-3.5 to +8.3)       | NS       |
| Very difficult                                                                                | 1 (1.2)                               | 6 (7.2)                                | +6.0 (-1.3 to +13.3)      | NS       |
| How did you find the overall performance of self-test? (N=83)                                 |                                       |                                        |                           |          |
| Very easy                                                                                     | 80 (96.4)                             | 77 (92.8)                              | -3.6 (-10.1 to +2.9)      | NS       |
| Rather easy                                                                                   | 2 (2.4)                               | 6 (7.2)                                | +4.8 (-2.1 to +11.7)      | NS       |
| Rather difficult                                                                              | 1 (1.2)                               | 0 (0)                                  | -1.2 (-6.5 to +4.3)       | NS       |
| Very difficult                                                                                | 0 (0)                                 | 0 (0)                                  | -                         | NA       |
| How did you find the reading of strips after migration? (N=84)                                |                                       |                                        |                           |          |
| Very easy                                                                                     | 73 (86.9)                             | 70 (83.3)                              | -3.6 (-10.0 to +3.0)      | NS       |
| Rather easy                                                                                   | 8 (9.5)                               | 10 (11.9)                              | +2.4 (-3.4 to 8.4)        | NS       |
| Rather difficult                                                                              | 2 (2.4)                               | 3 (3.6)                                | +1.2 (-4.0 to +6.4)       | NS       |
| Very difficult                                                                                | 1 (1.2)                               | 1 (1.2)                                | -                         | NA       |
| How did you find the interpretation of self-test results? (N=84)                              |                                       |                                        |                           |          |
| Very easy                                                                                     | 76 (90.5)                             | 76 (90.5)                              | -                         | NA       |
| Rather easy                                                                                   | 8 (9.5)                               | 7 (8.3)                                | -1.2 (-6.4 to +4.2)       | NS       |
| Rather difficult                                                                              | 0 (0)                                 | 0 (0)                                  | -                         | NA       |
| Very difficult                                                                                | 0 (0)                                 | 1 (1.2)                                | +1.2 (-4.0 to +6.4)       | NS       |
| How did you find your ability to surmount the difficulties encountered? (N=167)               |                                       |                                        |                           |          |
| Very easy                                                                                     | -                                     | 162 (97.0)                             | NA                        | NA       |
| Rather easy                                                                                   | -                                     | 5 (3.0)                                | NA                        | NA       |
| Rather difficult                                                                              | -                                     | 0                                      | NA                        | NA       |
| Very difficult                                                                                | -                                     | 0                                      | NA                        | NA       |

354 \* Difference and CI were assessed with the Wilson score bounds using data collected in the post-test satisfaction questionnaire paired to those

355 from the pre-test satisfaction questionnaire;

356 # P-value calculated using Mac Nemar's test of paired data.

357

358 CI: Confidence interval; NA: Not applicable; NS: Not significant.

359

360 **Discussion**

361

362 We herein report on our recent experience during the last COVID-19 epidemic peak  
363 period of the practicability of a prototype capillary whole-blood COVID-19 self-test for IgG  
364 and IgM against SARS-CoV-2 serological screening among adult volunteers living in France.  
365 Our assessment of usability was made with reference to our previous experience in evaluating  
366 HIV self-testing according to the WHO recommendations [256]. Overall, the vast majority of  
367 participants correctly understood the instructions for use, showed good ability to carry out the  
368 self-testing procedure in order to obtain a valid test result, and demonstrated to be capable to  
369 correctly interpret the test results with high degree of satisfaction. Only a minority of  
370 participants needed verbal help, and only 1.5% of test results were misinterpreted. Taken  
371 together, our pilot study generated for the first-time to our knowledge evidence on generally  
372 good practicability of COVID-19 self-testing for serological IgG and IgM immune status,  
373 despite some limitations. These findings also provide the observational basis for the possibility  
374 of using with high confidence self-tests harboring 3 bands of interest, *i.e.* in the case of the  
375 prototype COVID-19 self-test, the control, IgG and IgM bands. Finally, our observations lay  
376 the foundations for the potential large-scale use of COVID-19 self-test in lay adults, at least  
377 Europeans [of high educational attainment](#), to complete the arsenal of available serological tests  
378 used to assess the immune status vis-a-vis SARS-CoV-2.

379 **Substudy 1.** The learning process in different fields of science needs to link theory  
380 to practice [289]. The expected results of substudy 1 are, therefore, important for the following  
381 practicability substudies 2 and 3, because it is mandatory to check that the instructions for use

382 can be read and understood by all users. Our findings showed that 89.2% of participants  
383 correctly answered all 10 questions indicating generally correct understanding of the key  
384 messages delivered by the instructions for use of the Exacto® COVID-19 self-test (Biosynex  
385 Swiss SA), with an overall rate of good responses of 97.1%. These satisfactory results may be  
386 explained in part by the high post-graduate education level of the majority of study participants.  
387 Indeed, previous experience from HIV self-testing showed that insufficient educational level  
388 constitutes a great challenge in the comprehension of the instructions for use [18,2930-312].  
389 Although systematic reviews and meta-analysis have shown that HIV self-testing can be  
390 successfully conducted by untrained users without in-person demonstrations [304], our  
391 observations emphasize the need to complete the classical paper instructions for use by other  
392 instructional tools such as short video film, which was preferred by 1 of 13 study participants  
393 for better instructions for use understanding. These findings are reminiscent to previous WHO  
394 recommendations for HIV self-test stating that all self-testers should have the possibility to  
395 access or receive assistance over the phone, through the internet, or with additional instructions  
396 such as video, animations, or diagrams [15].

397 **Substudy 2.** All study participants carried out the COVID-19 self-test and  
398 succeeded in obtaining a valid test result with an overall usability index estimated at 98.5%.  
399 Some difficulty in the correct use of the pipette to transfer the blood sample was the principal  
400 reported concern encountered and was the most common reason for oral help. In previous  
401 reports on HIV self-testing, the difficulties in self-lancing and blood transfer to the cassette  
402 were also observed by lay users [323]. These features underline the importance of video  
403 instructions, when available. ~~AIn the present series, lthough a small sample size of all~~  
404 participants ~~using used~~ the video instructions ~~in this series, all of them did~~ not needed any help  
405 and used the pipette without any difficulty or error. The use of a hotline could also offer direct  
406 distant assistance.

407 **Substudy 3.** The ability to correctly read and interpret the self-test results is  
 408 considered as a ~~delicate~~-critical step in self-testing [334]. This refers not only to the visual  
 409 subjectivity related to good visual acuity (*i.e.* eye without illness) when reading and interpreting  
 410 the results, but also to the number of bands to read on the test strip. Indeed, the Exacto® COVID-  
 411 19 self-test (Biosynex Swiss SA) has three bands, one of which is for the internal control and  
 412 two for the detection of IgG and IgM antibodies. The interpretation of a weak positive band  
 413 may be therefore difficult for untrained users. In our series, the rate (98.8%) of correct  
 414 interpretation of COVID-19 self-test results was high, as previously reported with HIV self-test  
 415 using similar cassette [17,18]. However, the majority (80%) of misinterpreted test results  
 416 concerned a weak positive IgM band. This difficulty in reading some weak positive bands and  
 417 in final interpretation of test results can even occur in lay users as well as trained-users during  
 418 professional testing [345].

419 On the other hand, the interpretation of positive results with the serological IgM and  
 420 IgG test of SARS-CoV-2 presents particularities in this period of the ongoing outbreak. While  
 421 positive serology for other viral infections such as HIV means an active infection [356], a  
 422 positive test result with the Exacto® COVID-19 self-test (Biosynex Swiss SA) rather indicates  
 423 ongoing or previous SARS-CoV-2 infection, with serological immune IgG or IgM immune  
 424 responses to SARS-CoV-2. Furthermore, according to the kinetic profile of the systemic  
 425 humoral response against SARS-CoV-2 and the lifespan of circulating immunoglobulins, the  
 426 presence of IgM alone or with IgG means that the contact with the virus was relatively recent  
 427 [367]. The presence of IgG means that the contact with the virus occurred at least 14 days ago  
 428 [367]. Thus, a positive test result on the COVID-19 self-test does not mean that the SARS-  
 429 CoV-2 infection is still active. Despite the explanations were clearly given in the instructions  
 430 for use, 10.2% of study participants were not aware that the COVID-19 self-test does not detect  
 431 the presence of the virus. This misinterpretation of positive test results can provide unfortunate

Formatted: Not Highlight

Formatted: Not Highlight

432 consequences such as self-medication or [psychological distress neuro-psychiatric disorders](#) of  
433 variable intensity, especially in a person [who has not received pre-test counseling not](#)  
434 [psychologically prepared](#) [378].

435 **Substudy 4.** The pre-test and post-test answers to the satisfaction questionnaire  
436 concerning the instructions for use (substudy 1), performing the self-test (substudy 2), and the  
437 interpretation of the results (substudy 2), showed that the large majority of the COVID-19 self-  
438 testing steps were considered easy by participants, as previously reported for HIV self-testing  
439 using similar rapid test cassette [17,18]. However, the satisfaction with sample collection and  
440 blood transfer to the test cassette evolved from “very easy” in pre-test period to “rather easy”  
441 after having performed the self-test. This latter observation reminds us our previous experience  
442 with HIV self-testing, during which the fear of self-sticking provided capillary blood sample  
443 collection difficult in a minority of lay user [18].

444 **Strengths and limitations.** Our study is original by highlighting for the first  
445 time the usability of COVID-19 self-test, as a novel approach to assess SARS-CoV-2-specific  
446 humoral immunity by using rapid diagnostic test and self-interpretation of the results. Our study  
447 also shows for the first time the possibility of correctly interpreting three bands on the strip of  
448 a rapid diagnostic test by lay users from general adult population. However, the study has some  
449 limitations. First, the presence of an observer may lead to a bias in our observations concerning  
450 the participants' ability to perform the tests and to interpret the results. Furthermore, the low  
451 sample size could reduce the study's power [to detect a relative difference between groups with](#)  
452 [high precision](#). Finally, further steps are needed to improve mass screening for COVID-19,  
453 including the development of other tests such as oral fluid based self-testing, antigen self-  
454 testing, as well as home self-sampling.

455 [The role of the COVID-19 self-test in fighting the epidemic, caring for infected people](#)  
456 [and preventing risk of transmission is not yet known. The possible risk of adverse effects of the](#)

457 [COVID-19 self-test should not be underestimated, such as a pseudo-insurance of immunity or](#)  
458 [non-contagiousness. Furthermore, there is limited understanding of adult public acceptability](#)  
459 [and usability of rapid diagnostic tests in the home setting, as most are currently designed as](#)  
460 [professional use to be carried out by healthcare professionals. It will of course be necessary to](#)  
461 [precisely assess all these potential perverse effects. However, the place of the COVID-19 self-](#)  
462 [test could simply be a complementary public health tool. Indeed, testing a large number of](#)  
463 [individuals for serological survey for example would be impractical if a blood sample is](#)  
464 [required for SARS-CoV-2 serologic testing in a laboratory. The solution to use self-sampling](#)  
465 [and self-testing with participants reporting their results to the clinicians or epidemiologists has](#)  
466 [been recently reported in a nationally representative serosurvey of SARS-CoV-2 in adults in](#)  
467 [England, demonstrating its full feasibility \[38\].](#)

468         According to the WHO [39], generalization of COVID-19 testing is key to controlling  
469 the spread of SARS-CoV-2 infection. In particular, the findings derived from serological assays  
470 can provide valuable information that would help to support the diagnosis, treatment and  
471 prevention of SARS-CoV-2 infection [40]. During the COVID-19 epidemic, ~~original~~-novel  
472 approaches using individual involvement were proposed in addition to the collective public  
473 health approach, and both strategies were furthermore sometimes combined. For example, self-  
474 collected upper respiratory tract swabs for COVID-19 test has been shown as a feasible way to  
475 increase overall testing rate in South Africa [41], and the US Food and Drug Administration  
476 has approved the first kit for self-collected saliva specimen to be used for molecular testing of  
477 SARS-CoV-2 [42]. Self-diagnosis of breathing complications from breathing sounds using the  
478 smartphone's microphone has been proposed as an appealing resolution for COVID-19 self-  
479 testing [43]. Self-reporting of an illness consistent with COVID-19 and artificial intelligence-  
480 coupled self-testing and tracking systems for COVID-19 have been developed using mobile  
481 phone applications [44,45]. While the place of SARS-CoV-2-specific serology remains

482 controversial [46,47], the indications for the COVID-19 serological self-test have been the  
483 matter of poor attention from official agencies until now and remain to be defined [48]. It seems  
484 obvious that the motivations for carrying out a COVID-19 self-test would be clearly different  
485 than those which push to carry out an HIV self-test, ~~but this problematic exceeds the aim of our~~  
486 ~~study~~. The COVID-19 self-test allows an individual to test himself simply and quickly, without  
487 visiting a care structure, with the essential aim of knowing if the person is in the course of  
488 infection (presence of specific IgM alone) or ~~has made had~~ a past infection (presence of specific  
489 IgG, alone or associated with IgM). Thus, COVID-19 self-testing for serological screening  
490 could be proposed to identify exposed patients that are presumptively immune to SARS-CoV-  
491 2 secondary to ongoing or past-infection and to quantify the prevalence of exposure within a  
492 population for epidemiologic purposes. The instructions for use clearly explains that the lack  
493 of reactivity does not eliminate a SARS-CoV-2 infection in progress, and that in the presence  
494 of any IgG or IgM reactivities the patient must seek confirmatory antibody test by a clinical  
495 laboratory and clinical follow-up, which could contribute to accentuating tensions in the  
496 healthcare system, in particular during epidemic periods~~refer to a health care structure for~~  
497 ~~clinical biological confirmation~~. In any case, the presence of reactivities could constitute an  
498 "immunological passport" of protection [46,47], ~~because it is not known if anti SARS CoV 2~~  
499 ~~antibodies are protective at this time~~, although the general assumption is that the presence of  
500 antibodies will provide at least some immunity [49]. However, it should be emphasized that the  
501 level of protection of seropositivity for SARS-CoV-2 as well as its duration are not known, and  
502 even that the presence of specific antibodies does not mean that the person is not contagious,  
503 particularly in onset of infection. It will therefore be important to pass this information on to  
504 subjects who self-test so that they continue to take precautions to protect themselves and others.  
505 While specific guidelines regarding how "presumptive immunity" will be determined and used  
506 do not exist, this potential use has probably generated the ~~interest~~most excitement in the lay

Formatted: Strikethrough



507 public [47]. In any case, an IgG positive COVID-19 self-test result may indicate recovery of a  
 508 previous SARS-CoV-2 infection, even asymptomatic or mild, ~~and would allow to take more~~  
 509 ~~moderate precautions and also to comfortably interact with other COVID-19 seropositive~~  
 510 ~~individuals.~~ Interestingly, serological home testing could be associated with at-home saliva or  
 511 swab self-sampling for further SARS-CoV-2 molecular diagnosis, and the widespread use of  
 512 both home approaches ~~is worthy of further study~~ ~~would be hugely beneficial to public health.~~  
 513 Those whom the viral test indicates an active SARS-CoV-2 infection (including silent carriers  
 514 and ~~patients~~ ~~individuals~~ with early or mild symptoms) will be able to take informed actions,  
 515 such as self-isolation. Furthermore, the risk exposure of the healthy population will be mitigated  
 516 by the actions taken by the (informed) infected population, thus slowing the spread of the  
 517 coronavirus and flattening the curve. Importantly, a confirmed population of “recovered”  
 518 individuals ~~may facilitate~~ ~~would allow~~ many to return to work, lead to partial lifting of “stay-at-  
 519 home” or “shelter-in-place” orders, and would help get the economy back to normal, with no  
 520 loss in protection for the most vulnerable. Recently, the British government, UK, are making  
 521 available SARS-CoV-2 antibody home tests for healthcare workers and the general public [50].  
 522 Home testing will be voluntary, but there is no doubt more people will test if the tests ~~could be~~  
 523 ~~freely available.~~ ~~are free.~~ ~~Removing financial barriers to self testing by making publicly funded~~  
 524 ~~tests available free to the entire population will help maximize rapid implementation and help~~  
 525 ~~COVID-19 affected country to recover and get back to work.~~

526       Until a cure or a vaccine becomes available, antibody and viral testing for SARS-CoV-  
 527 2 infection will play a critical role in limiting the pandemic and containing its economic damage  
 528 to individuals and the country. Our features demonstrate that COVID-19 self-testing for  
 529 serological immune status assessment is highly feasible with potential for use by ~~at least some~~  
 530 ~~groups with high levels of education~~ ~~the general public~~. If deployed wisely, it ~~will~~ ~~may~~ be  
 531 complementary to other serological screening tools and could ~~facilitate uptake of SARS-CoV-~~

Formatted: Strikethrough

~~2 serology offer an immediate and easy solution for SARS-CoV-2 serology, especially during recovery or de-confinement.~~

Formatted: English (United States)

~~The role of the COVID-19 self-test in fighting the epidemic, caring for infected people and preventing risk of transmission is not yet known. The possible risk of adverse effects of the COVID-19 self-test should not be underestimated, such as a pseudo-insurance of immunity or non-contagiousness. Furthermore, there is limited understanding of adult public acceptability and usability of rapid diagnostic tests in the home setting, as most are currently designed as professional use to be carried out by healthcare professionals. It will of course be necessary to precisely assess all these potential perverse effects. However, the place of the COVID-19 self-test could simply be a complementary public health tool. Indeed, testing a large number of individuals for serological survey for example would be impractical if a blood sample is required for SARS-CoV-2 serologic testing in a laboratory. The solution to use self-sampling and self-testing with participants reporting their results to the clinicians or epidemiologists has been recently reported in a nationally representative serosurvey of SARS-CoV-2 in adults in England, demonstrating its full feasibility [Atehison et al., 2020],” periods.~~

Formatted: Font: (Default) Times New Roman, 12 pt, English (United States), Not Highlight

Formatted: English (United States), Not Highlight

**Acknowledgments.** The authors are grateful to the volunteers for their willingness to participate in the study. We also thank Biosynex, Strasbourg, France, for providing the Exacto® COVID-19 self-tests for the study. ~~Dr. Serge Tonen Wolyec was recipient of ERASMUS+ program between the University of Kisangani, Democratic Republic of the Congo, and the University of Liège, Belgium.~~

## 557 **References**

558

- 559 1. Zhu N, Zhang D, Wang W, Li X, Yang B, Song J, et al. A novel coronavirus from patients with pneumonia in  
560 China, 2019. *N Engl J Med.* 2020;382:727–733.
- 561 2. Guan W, Ni Z, Hu Y, Liang W, Ou C, He J, et al. Clinical Characteristics of Coronavirus Disease 2019 in  
562 China. *N Engl J Med.* 2020;382:1708–1720.
- 563 3. Huang C, Wang Y, Li X, Ren L, Zhao J, Hu Y, et al. Clinical features of patients infected with 2019 novel  
564 coronavirus in Wuhan, China. *Lancet.* 2020;395:497–506.
- 565 4. World Health Organization. Coronavirus disease (COVID-19) outbreak. Available from: <https://www.who.int>  
566 (last access 13 June 2020).
- 567 5. Wölfel R, Corman VM, Guggemos W, Seilmaier M, Zange S, Müller MA, et al. Virological assessment of  
568 hospitalized patients with COVID-2019. *Nature.* 2020;581:465–469.
- 569 6. Péré H, Podglajen I, Wack M, Flamarion E, Mirault T, Goudot G, et al. Nasal Swab Sampling for SARS-CoV-  
570 2: a Convenient Alternative in Times of Nasopharyngeal Swab Shortage. *J Clin Microbiol.* 2020 May  
571 26;58(6):e00721-20.
- 572 7. Amanat F, Stadlbauer D, Strohmeier S, Nguyen THO, Chromikova V, McMahon M, et al. A serological assay  
573 to detect SARS-CoV-2 seroconversion in humans. *Nat Med.* 2020 May 12. doi: 10.1038/s41591-020-0913-5.  
574 Online ahead of print.
- 575 8. Long QX, Liu BZ, Deng HJ, Wu GC, Deng K, Chen YK, et al. Antibody responses to SARS-CoV-2 in patients  
576 with COVID-19. *Nat Med.* 2020 Jun;26(6):845-848.
- 577 9. Petherick A. 2020. Developing antibody tests for SARS-CoV-2. *Lancet* 395:1101–1102.
- 578 10. World Health Organization. 2020. Laboratory testing for coronavirus disease 2019 (COVID-19) in suspected  
579 human cases: interim guidance, 2 March 2020. World Health Organization. Available from:  
580 [https://apps.who.int/iris/bitstream/handle/10665/331329/WHO-COVID-19-laboratory-2020.4-](https://apps.who.int/iris/bitstream/handle/10665/331329/WHO-COVID-19-laboratory-2020.4-eng.pdf?sequence=1&isAllowed=y)  
581 [eng.pdf?sequence=1&isAllowed=y](https://apps.who.int/iris/bitstream/handle/10665/331329/WHO-COVID-19-laboratory-2020.4-eng.pdf?sequence=1&isAllowed=y) (last access 21 June 2020).
- 582 11. Li Z, Yi Y, Luo X, Xiong N, Liu Y, Li S, et al. Development and clinical application of a rapid IgM-IgG  
583 combined antibody test for SARS-CoV-2 infection diagnosis. *J Med Virol.* 2020 Feb 27;10.1002/jmv.25727.
- 584 12. Pérez-García F, Pérez-Tanoira R, Romanyk J, Arroyo T, Gómez-Herruz P, Cuadros-González J. Alltest rapid  
585 lateral flow immunoassays is reliable in diagnosing SARS-CoV-2 infection from 14 days after symptom onset:  
586 A prospective single-center study. *J Clin Virol.* 2020 May 27;129:104473.

- 587 13. Dellière S, Salmona M, Minier M, Gabassi A, Alanio A, Le Goff J, et al. Evaluation of COVID-19 IgG/IgM  
588 Rapid Test from Orient Gene Biotech. *J Clin Microbiol*. 2020 Jun 9;JCM.01233-20.
- 589 14. Zainol Rashid Z, Othman SN, Abdul Samat MN, Ali UK, Wong KK. Diagnostic Performance of COVID-19  
590 Serology Assays. *Malays J Pathol*. 2020 Apr;42(1):13-21.
- 591 15. World Health Organization. Guidelines on HIV self-testing and partner notification: supplement to  
592 consolidated guidelines on HIV testing services. December 2016. Available from:  
593 [http://apps.who.int/iris/bitstream/handle/10665/251655/9789241549868-](http://apps.who.int/iris/bitstream/handle/10665/251655/9789241549868-eng.pdf;jsessionid=B043673B59952F021C313F076554ABA6?sequence=1)  
594 [eng.pdf;jsessionid=B043673B59952F021C313F076554ABA6?sequence=1](http://apps.who.int/iris/bitstream/handle/10665/251655/9789241549868-eng.pdf;jsessionid=B043673B59952F021C313F076554ABA6?sequence=1). (last access 28 May 2020).
- 595 16. World Health Organization & UNITAID. Market and Technology Landscape. HIV rapid diagnostic tests for  
596 self-testing, 4th Edition. July 2018. Available from: <https://unitaid.org/assets/HIVST-landscape-report.pdf>  
597 (last access 18 June 2020).
- 598 17. Prazuck T, Karon S, Gubavu C, Andre J, Legall JM, Bouvet E, et al. A finger-stick whole-blood HIV self-test  
599 as an HIV screening tool adapted to the general public. *PLoS One*. 2016;11(2):e0146755.
- 600 18. Tonen-Wolyec S, Batina-Agasa S, Muwonga J, Fwamba N'kulu F, Mboumba Bouassa RS, Bélec L. Evaluation  
601 of the practicability and virological performance of finger-stick whole-blood HIV self-testing in French-  
602 speaking sub-Saharan Africa. *PLoS One* 2018; 13: e0189475.
- 603 19. Tonen-Wolyec S, Batina-Agasa S, Longo JD, Mboumba Bouassa RS, Bélec L. Insufficient education is a key  
604 factor of incorrect interpretation of HIV self-test results by female sex workers in Democratic Republic of the  
605 Congo: A multicenter cross-sectional study. *Medicine (Baltimore)*. 2019 Feb;98(6):e14218.
- 606 20. Tonen-Wolyec S, Batina-Agasa S, Muwonga J, Mboumba Bouassa RS, Kayembe Tshilumba C, Bélec L.  
607 Acceptability, feasibility, and individual preferences of blood-based HIV self-testing in a population-based  
608 sample of adolescents in Kisangani, Democratic Republic of the Congo. *PLoS One*. 2019 Jul  
609 1;14(7):e0218795.
- 610 21. Tonen-Wolyec S, Mboumba Bouassa RS, Batina-Agasa S, Tepungipame AT, Tshilumba CK, Bélec L.  
611 Sociodemographic characteristics of adolescents preferring home-based HIV self-testing over facility-based  
612 voluntary counseling and testing: a cross-sectional study in Kisangani, Democratic Republic of the Congo. *Int*  
613 *J STD AIDS*. 2020 Apr;31(5):481-487.
- 614 22. Ministère des Solidarités et de santé. Tests COVID-19, guider votre choix parmi les 155 tests Covid-19 du  
615 marché. France 2020. Available from: <https://covid-19.sante.gouv.fr/tests>. (last access 20 June 2020)
- 616 23. Haute Autorité de Santé. Cahier des charges définissant les modalités d'évaluation des performances des tests

617 sérologiques détectant les anticorps dirigés contre le SARS-CoV-2. Saint-Denis, France, 2020. Available from:  
 618 [https://www.has-sante.fr/upload/docs/application/pdf/2020-](https://www.has-sante.fr/upload/docs/application/pdf/2020-04/cahier_des_charges_test_serologique_covid19.pdf)  
 619 [04/cahier\\_des\\_charges\\_test\\_serologique\\_covid19.pdf](https://www.has-sante.fr/upload/docs/application/pdf/2020-04/cahier_des_charges_test_serologique_covid19.pdf). (last access 20 June 2020)

620 ~~24.~~ [Laboratoire Biosynex. TEST COVID-19 BIOSYNEX SA \(FR\). Available from:](#)  
 621 <https://www.youtube.com/watch?v=iN1P2y36vow>. (last access 30 June 2020)

622 ~~25-24.~~ Santé publique France. COVID-19 : point épidémiologique du 2 juillet 2020. Available from:  
 623 [https://www.santepubliquefrance.fr/maladies-et-traumatismes/maladies-et-infections-respiratoires/infection-](https://www.santepubliquefrance.fr/maladies-et-traumatismes/maladies-et-infections-respiratoires/infection-a-coronavirus/documents/bulletin-national/covid-19-point-epidemiologique-du-2-juillet-2020)  
 624 [a-coronavirus/documents/bulletin-national/covid-19-point-epidemiologique-du-2-juillet-2020](https://www.santepubliquefrance.fr/maladies-et-traumatismes/maladies-et-infections-respiratoires/infection-a-coronavirus/documents/bulletin-national/covid-19-point-epidemiologique-du-2-juillet-2020). (last access 02  
 625 July 2020)

626 ~~26-25.~~ World Health Organization (WHO) WHO prequalification: Sample product dossier for an IVD intended  
 627 for HIV self-testing. SIMU™ self-test for HIV 120 working document, December 2015.  
 628 [http://www.who.int/sample\\_dos\\_self\\_testinghiv\\_for\\_public\\_c\\_\\_comment\\_v1\\_pdf](http://www.who.int/sample_dos_self_testinghiv_for_public_c__comment_v1_pdf). 2015. (last access 13 June  
 629 2020).

630 ~~27-26.~~ Cohen J. A coefficient of agreement for nominal scales. *Educ. Psychol. Meas.* 1960;20:37-46.

631 ~~28-27.~~ Landis JR, Koch GG. The measurement of observer agreement for categorical data. *Biometrics.* 1997;33:159-174.

632 ~~29-28.~~ Neves BS, Altermann C, Gonçalves R, Lara MV, Mello-Carpes PB. Home-based vs. Laboratory-Based  
 633 Practical Activities in the Learning of Human Physiology: The Perception of Students. *Adv Physiol Educ.* 2017  
 634 Mar 1;41(1):89-93.

635 ~~30-29.~~ Tonen-Wolyec S, Mboup S, Grésenguét G, Bouassa RB, Bélec L. Insufficient education is a challenge  
 636 for HIV self-testing. *Lancet HIV.* 2018; 5(7):e341.

637 ~~31-30.~~ Figueroa C, Johnson C, Ford N, Sands A, Dalal S, Meurant R, et al. Reliability of HIV rapid diagnostic  
 638 tests for self-testing performed by self-testers compared to health-care workers: a systematic review and meta-  
 639 analysis. *Lancet HIV.* 2018; 5(6):e277-e290.

640 ~~32-31.~~ Simwinda M, Kumwenda MK, Dacombe RJ, Kayira L, Muzumara A, Johnson CC, et al. Ability to  
 641 understand and correctly follow HIV self-test kit instructions for use: applying the cognitive interview  
 642 technique in Malawi and Zambia. *J Int AIDS Soc.* 2019 Mar; 22(Suppl Suppl 1): e25253.

643 ~~33-32.~~ Pant Pai N, Sharma J, Shivkumar S, Pillay S, Vadnais C, Joseph L, et al. Supervised and unsupervised  
 644 self-testing for HIV in high- and low-risk populations: a systematic review. *PLoS Med.* 2013;10(4):e1001414.  
 645

- 646 [34-33.](#) Ortblad KF, Musoke DK, Ngabirano T, Nakitende A, Haberer JE, McConnell M, et al. Female sex  
647 workers often incorrectly interpret HIV self-test results in Uganda. *J Acquir Immune Defic Syndr* 2018;79:e42–  
648 5.
- 649 [35-34.](#) Tahlil KM, Ong JJ, Rosenberg NE, Tang W, Conserve DF, Nkengasong S, et al. Verification of HIV Self-  
650 Testing Use and Results: A Global Systematic Review. *AIDS Patient Care STDS*. 2020 Apr;34(4):147-156.
- 651 [36-35.](#) CDC, WHO, APL. Guidelines for Appropriate Evaluations of HIV Testing Technologies in Africa. 2001.
- 652 [37-36.](#) Sethuraman N, Jeremiah SS, Ryo A. Interpreting Diagnostic Tests for SARS-CoV-2. *JAMA*. 2020 May  
653 6. doi: 10.1001/jama.2020.8259.
- 654 [38-37.](#) Rogers JP, Chesney E, Oliver D, Pollak TA, McGuire P, Fusar-Poli P, et al. Psychiatric and  
655 neuropsychiatric presentations associated with severe coronavirus infections: a systematic review and meta-  
656 analysis with comparison to the COVID-19 pandemic. *Lancet Psychiatry*. 2020 Jul;7(7):611-627.
- 657 [38.](#) [Atchison C, Pristerà P, Cooper E, Papageorgiou V, Redd R, Piggin M, Flower B, Fontana G, Satkunarajah S,](#)  
658 [Ashrafian H, Lawrence-Jones A, Naar L, Chigwende J, Gibbard S, Riley S, Darzi A, Elliott P, Ashby D,](#)  
659 [Barclay W, Cooke GS, Ward H. Usability and acceptability of home-based self-testing for SARS-CoV-2](#)  
660 [antibodies for population surveillance. Clin Infect Dis. 2020 Aug 12;ciaa1178. doi: 10.1093/cid/ciaa1178.](#)
- 661 39. World Health Organization. Laboratory testing strategy recommendations for COVID-19. 22 Mar 2020.  
662 Available at : [https://apps.who.int/iris/bitstream/handle/10665/331509/WHO-COVID-19-lab\\_testing-2020.1-](https://apps.who.int/iris/bitstream/handle/10665/331509/WHO-COVID-19-lab_testing-2020.1-eng.pdf)  
663 [eng.pdf](https://apps.who.int/iris/bitstream/handle/10665/331509/WHO-COVID-19-lab_testing-2020.1-eng.pdf) (last access 24 June 2020).
- 664 40. Lee CY, Lin RTP, Renia L, Ng LFP. Serological Approaches for COVID-19: Epidemiologic Perspective on  
665 Surveillance and Control. *Front Immunol*. 2020 Apr 24;11:879.
- 666 41. Adeniji AA. 'Self-collected upper respiratory tract swabs for COVID-19 test': A feasible way to increase  
667 overall testing rate and conserve resources in South Africa. *Afr J Prim Health Care Fam Med*. 2020 May  
668 28;12(1):e1-e4.
- 669 42. Food and Drug Administration. FDA NEWS RELEASE. Coronavirus (COVID-19) Update: FDA Authorizes  
670 First Diagnostic Test Using At-Home Collection of Saliva Specimens. United states of America, 2020.  
671 Available at : [https://www.fda.gov/news-events/press-announcements/coronavirus-covid-19-update-fda-](https://www.fda.gov/news-events/press-announcements/coronavirus-covid-19-update-fda-authorizes-first-diagnostic-test-using-home-collection-saliva)  
672 [authorizes-first-diagnostic-test-using-home-collection-saliva](https://www.fda.gov/news-events/press-announcements/coronavirus-covid-19-update-fda-authorizes-first-diagnostic-test-using-home-collection-saliva) (last access: 24 June 2020).
- 673 43. Faezipour M, Abuzneid A. Smartphone-Based Self-Testing of COVID-19 Using Breathing Sounds. *Telemed*  
674 *J E Health*. 2020 Jun 2. doi: 10.1089/tmj.2020.0114.

- 675 44. McCullough PA, Eidt J, Rangaswami J, Lerma E, Tumlin J, Wheelan K, et al. Urgent need for individual  
676 mobile phone and institutional reporting of at home, hospitalized, and intensive care unit cases of SARS-CoV-  
677 2 (COVID-19) infection. *Rev Cardiovasc Med*. 2020 Mar 30;21(1):1-7.
- 678 45. Mashamba-Thompson TP, Crayton ED. Blockchain and Artificial Intelligence Technology for Novel  
679 Coronavirus Disease-19 Self-Testing. *Diagnostics (Basel)*. 2020 Apr 1;10(4):198.
- 680 46. Bélec L, Péré H, Mboumba Bouassa RS, Veyer D, Jenabian MA. Potential pitfalls of routine SARS-CoV-2  
681 serology for mass screening. *J Med Virol*. 2020 Jun 2;10.1002/jmv.26034.
- 682 47. Farnsworth CW, Anderson NW. SARS-CoV-2 Serology: Much Hype, Little Data. *Clin Chem*. 2020 Apr  
683 28:hvaa107.
- 684 48. Food and Drug Administration. FDA STATEMENT. Coronavirus (COVID-19) Update: FDA Alerts  
685 Consumers About Unauthorized Fraudulent COVID-19 Test Kits. United states of America, 2020. Available  
686 at : [https://www.fda.gov/news-events/press-announcements/coronavirus-covid-19-update-fda-alerts-](https://www.fda.gov/news-events/press-announcements/coronavirus-covid-19-update-fda-alerts-consumers-about-unauthorized-fraudulent-covid-19-test-kits)  
687 [consumers-about-unauthorized-fraudulent-covid-19-test-kits](https://www.fda.gov/news-events/press-announcements/coronavirus-covid-19-update-fda-alerts-consumers-about-unauthorized-fraudulent-covid-19-test-kits) (last access: 24 June 2020).
- 688 49. Jiang S, Hillyer C, Du L. Neutralizing Antibodies against SARS-CoV-2 and Other Human Coronaviruses.  
689 *Trends Immunol*. 2020 Apr 2.
- 690 50. NATURE VIDEO. We test a home antibody kit for tracking Covid-19. Easy-to-use postal tests may be  
691 important for monitoring community transmission. 04 JUNE 2020. Available at:  
692 <https://www.nature.com/articles/d41586-020-01677-y> (last access: 24 June 2020).

## 693 [Supporting information](#)

694 [S1 Appendix. Paper-based instruction for use of the Exacto® COVID-19 self-test](#)  
695 [\(Biosynex Swiss SA\).](#)

696 [S2 Appendix. video-based instruction for use of the Exacto® COVID-19 self-test](#)  
697 [\(Biosynex Swiss SA\).](#)

698 [S3 Appendix. Study questionnaires in French \(original language\).](#)

699 [S4 Appendix. Study questionnaires in English.](#)

700 ~~Aitchison C, Pristerà P, Cooper E, Papageorgiou V, Redd R, Piggitt M, Flower B, Fontana G, Satkunarajah S,~~  
701 ~~Ashrafian H, Lawrence Jones A, Naar L, Chigwende J, Gibbard S, Riley S, Darzi A, Elliott P, Ashby D,~~  
702

703 ~~[Barclay W, Cooke GS, Ward H. Usability and acceptability of home-based self-testing for SARS-CoV-2](#)~~  
704 ~~[antibodies for population surveillance. Clin Infect Dis. 2020 Aug 12:eiaa1178. doi: 10.1093/cid/ciaa1178.](#)~~



## Responses to journal requirements and to Reviewers

### **Journal Requirements:**

*When submitting your revision, we need you to address these additional requirements.*

*1. Please ensure that your manuscript meets PLOS ONE's style requirements, including those for file naming. The PLOS ONE style templates can be found at*

*[https://clicktime.symantec.com/3Ab2UDzwphFJFJ5wTH8Dthe6H2?u=https%3A%2F%2Fjournals.plos.org%2Fplosone%2Fs%2Ffile%3Fid%3DwjVg%2FPLOOne\\_formatting\\_sample\\_main\\_body.pdf](https://clicktime.symantec.com/3Ab2UDzwphFJFJ5wTH8Dthe6H2?u=https%3A%2F%2Fjournals.plos.org%2Fplosone%2Fs%2Ffile%3Fid%3DwjVg%2FPLOOne_formatting_sample_main_body.pdf)*  
*and*

*[https://clicktime.symantec.com/3J1bpueumkNeCCUwpeXGyX66H2?u=https%3A%2F%2Fjournals.plos.org%2Fplosone%2Fs%2Ffile%3Fid%3Dba62%2FPLOOne\\_formatting\\_sample\\_title\\_authors\\_affiliations.pdf](https://clicktime.symantec.com/3J1bpueumkNeCCUwpeXGyX66H2?u=https%3A%2F%2Fjournals.plos.org%2Fplosone%2Fs%2Ffile%3Fid%3Dba62%2FPLOOne_formatting_sample_title_authors_affiliations.pdf)*

**Our answer:** We have checked that the manuscript meets the PLOS ONE'S requirements, including file names and affiliations.

*2. Please include additional information regarding the survey or questionnaire used in the study and ensure that you have provided sufficient details that others could replicate the analyses.*

*For instance, if you developed a questionnaire as part of this study and it is not under a copyright more restrictive than CC-BY, please include a copy, in both the original language and English, as Supporting Information.*

**Our answer:** As requested, the study questionnaires in French (original language) as well as in English have been uploaded in the submission system, as supporting information.

*3. Thank you for stating the following in the Acknowledgments Section of your manuscript:*

*'Dr. Serge Tonen-Wolyec was recipient of ERASMUS+ program between the University of Kisangani, Democratic Republic of the Congo, and the University of Liège, Belgium.'*

*We note that you have provided funding information that is not currently declared in your Funding Statement. However, funding information should not appear in the Acknowledgments section or other areas of your manuscript. We will only publish funding information present in the Funding Statement section of the online submission form.*

*a. Please remove any funding-related text from the manuscript and let us know how you would like to update your Funding Statement. Currently, your Funding Statement reads as follows:*

*'The authors received no specific funding for this work.'*

**Our answer:** In order to acknowledge the journal requirement, we have removed any funding-related text from the manuscript and we have updated our Funding Statement as follow: "This work was partly supported by Biosynex SA. The funders played a role in providing the prototype SARS-CoV-2 test for self-test (Exacto<sup>®</sup> COVID-19 self-test, Biosynex Swiss SA) and data collection. The study design, analysis, decision to publish, and preparation of the manuscript were not sponsored. Dr. Serge Tonen-Wolyec was recipient of ERASMUS+ program between the University of Kisangani, Democratic Republic of the Congo, and the University of Liège, Belgium."

*b. Please include your amended statements within your cover letter; we will change the online submission form on your behalf.*

**Our answer:** We have included our amended Funding statement within our cover letter.

*4. Thank you for stating the following in the Competing Interests section:*

*'The authors have declared that no competing interests exist.'*

*We note that one or more of the authors are employed by a commercial company: BioSynex*

*a. Please provide an amended Funding Statement declaring this commercial affiliation, as well as a statement regarding the Role of Funders in your study. If the funding organization did not play a role in the study design, data collection and analysis, decision to publish, or preparation of the manuscript and only provided financial support in the form of authors' salaries and/or research materials, please review your statements relating to the author contributions, and ensure you have specifically and accurately indicated the role(s) that these authors had in your study. You can update author roles in the Author Contributions section of the online submission form.*

*Please also include the following statement within your amended Funding Statement.*

*“The funder provided support in the form of salaries for authors [insert relevant initials], but did not have any additional role in the study design, data collection and analysis, decision to publish, or preparation of the manuscript. The specific roles of these authors are articulated in the ‘author contributions’ section.”*

*If your commercial affiliation did play a role in your study, please state and explain this role within your updated Funding Statement.*

*b. Please also provide an updated Competing Interests Statement declaring this commercial affiliation along with any other relevant declarations relating to employment, consultancy, patents, products in development, or marketed products, etc.*

*Within your Competing Interests Statement, please confirm that this commercial affiliation does not alter your adherence to all PLOS ONE policies on sharing data and materials by including the following statement: "This does not alter our adherence to PLOS ONE policies on sharing data and materials." (as detailed online in our guide for authors <http://journals.plos.org/plosone/s/competing-interests>) . If this adherence statement is not accurate and there are restrictions on sharing of data and/or materials, please state these. Please note that we cannot proceed with consideration of your article until this information has been declared.*

*c. Please include both an updated Funding Statement and Competing Interests Statement in your cover letter. We will change the online submission form on your behalf.*

*Please know it is PLOS ONE policy for corresponding authors to declare, on behalf of all authors, all potential competing interests for the purposes of transparency. PLOS defines a competing interest as anything that interferes with, or could reasonably be perceived as interfering with, the full and objective presentation, peer review, editorial decision-making, or publication of research or non-research articles submitted to one of the journals. Competing interests can be financial or non-financial, professional, or personal. Competing interests can arise in relationship to an organization or another person. Please follow this link to our website for more details on competing interests: <http://journals.plos.org/plosone/s/competing-interests>*

**Our answer:** We have declared that no competing interests exist. Dr. Raphael Dupont, who is an employee of Biosynex SA with a salary, had supervised the data collection in Strasbourg,

especially during periods of confinement where the movement of individuals was restricted. This does not alter our adherence to PLOS ONE policies on sharing data and materials. We have added this highlighting in our cover letter and online submission.

5. PLOS requires an ORCID iD for the corresponding author in Editorial Manager on papers submitted after December 6th, 2016. Please ensure that you have an ORCID iD and that it is validated in Editorial Manager. To do this, go to 'Update my Information' (in the upper left-hand corner of the main menu), and click on the Fetch/Validate link next to the ORCID field. This will take you to the ORCID site and allow you to create a new iD or authenticate a pre-existing iD in Editorial Manager. Please see the following video for instructions on linking an ORCID iD to your Editorial Manager account: [https://clicktime.symantec.com/3QJAoi3RwJ4rwEt9UViL8wS6H2?u=https%3A%2F%2Fwww.youtube.com%2Fwatch%3Fv%3D\\_xcelfuvtxQ](https://clicktime.symantec.com/3QJAoi3RwJ4rwEt9UViL8wS6H2?u=https%3A%2F%2Fwww.youtube.com%2Fwatch%3Fv%3D_xcelfuvtxQ)

**Our answer:** We have added a validated ORCID iD (<https://orcid.org/0000-0002-5001-0405>) of the corresponding author in Editorial Manager.

## **Reviewers' comments:**

*Reviewer's Responses to Questions*

### **Comments to the Author**

1. *Is the manuscript technically sound, and do the data support the conclusions?*

*The manuscript must describe a technically sound piece of scientific research with data that supports the conclusions. Experiments must have been conducted rigorously, with appropriate controls, replication, and sample sizes. The conclusions must be drawn appropriately based on the data presented.*

*Reviewer #1: Partly*

*Reviewer #2: Partly*

**Our answer:** We thank the reviewers for their nice comments on our work. However, in order to acknowledge the comments raised by referees, we have made corrections thorough the manuscript; therefore, we hope that our revised manuscript is more technically sound.

2. *Has the statistical analysis been performed appropriately and rigorously?*

*Reviewer #1: Yes*

*Reviewer #2: Yes*

**Our answer:** We thank the reviewers for their nice comments on our work.

3. *Have the authors made all data underlying the findings in their manuscript fully available?*

*The PLOS Data policy requires authors to make all data underlying the findings described in their manuscript fully available without restriction, with rare exception (please refer to the Data Availability Statement in the manuscript PDF file). The data should be provided as part of the manuscript or its supporting information, or deposited to a public repository. For example, in addition to summary statistics, the data points behind means, medians and variance measures should be available. If there are restrictions on publicly sharing data—e.g. participant privacy or use of data from a third party—those must be specified.*

*Reviewer #1: Yes*

Reviewer #2: Yes

**Our answer:** We thank the reviewers for their nice comments on our work.

4. Is the manuscript presented in an intelligible fashion and written in standard English?

*PLOS ONE does not copyedit accepted manuscripts, so the language in submitted articles must be clear, correct, and unambiguous. Any typographical or grammatical errors should be corrected at revision, so please note any specific errors here.*

Reviewer #1: No

Reviewer #2: Yes

**Our answer:** In order to acknowledge the comments raised by Reviewer # 1, we have corrected words and grammar as suggested by Referee. We hope that our revised manuscript is presented in an intelligible fashion and written in standard American English.

5. Review Comments to the Author

*Please use the space provided to explain your answers to the questions above. You may also include additional comments for the author, including concerns about dual publication, research ethics, or publication ethics. (Please upload your review as an attachment if it exceeds 20,000 characters)*

### **Answer to reviewer #1**

*This study is potentially one of several necessary but not sufficient steps towards translation to practice. However, the discussion must be made much more conservative. The extensive speculation on the role of home serology testing could create safety problems and is of major concern.*

**Our answer:** The remark of the reviewer is right. To acknowledge the reviewer's concern, we have completed the Strengths and limitations section by adding the following paragraph: "The role of the COVID-19 self-test in fighting the epidemic, caring for infected people and preventing risk of transmission is not yet known. The possible risk of adverse effects of the COVID-19 self-test should not be underestimated, such as a pseudo-insurance of immunity or non-contagiousness. Furthermore, there is limited understanding of adult public acceptability and usability of rapid diagnostic tests in the home setting, as most are currently designed as professional use to be carried out by healthcare professionals. It will of course be necessary to precisely assess all these potential perverse effects. However, the place of the COVID-19 self-test could simply be a complementary public health tool. Indeed, testing a large number of individuals for serological survey for example would be impractical if a blood sample is required for SARS-CoV-2 serologic testing in a laboratory. The solution to use self-sampling and self-testing with participants reporting their results to the clinicians or epidemiologists has been recently reported in a nationally representative serosurvey of SARS-CoV-2 in adults in England, demonstrating its full feasibility [Atchison et al., 2020]."

Atchison C, Pristerà P, Cooper E, Papageorgiou V, Redd R, Piggitt M, Flower B, Fontana G, Satkunarajah S, Ashrafian H, Lawrence-Jones A, Naar L, Chigwende J, Gibbard S, Riley S, Darzi A, Elliott P, Ashby D, Barclay W, Cooke GS, Ward H. Usability and acceptability of home-based self-testing for SARS-CoV-2 antibodies for population surveillance. *Clin Infect Dis*. 2020 Aug 12:ciaa1178. doi: 10.1093/cid/ciaa1178.

*Highlight [page 8]: 98.5% (95% CI: 96.5–99.4) test results were correctly interpreted, while misinterpretation occurred in only...*

*Note [page 8]: L47. What is the definition of the correct interpretation of the test?*

**Our answer:** Since the expected results were known from the code numbers of the eight standardized tests, the correct interpretation of the tests was defined by the percent agreement between the tests results read and interpreted by the participants compared to the expected results coded by the numbers and verified by observers. Thus, misinterpretation corresponded to the percent disagreement between the test results read and interpret by the participants and the expected results coded by the numbers. We have added these clarifications in the abstract and the body of the text.

*Note [page 10]: L88 Change ‘as’ to ‘as well as’*

*Highlight [page 10]: HIV self-testing has demonstrated high acceptability with very convenient usability in various adolescent and adult profane populations from developed as resources-constrained settings [17-21].*

*Note [page 10]: L88 profane? Don’t think you mean this- suggest remove this word.*

**Our answer:** We have corrected the sentence, as suggested.

*Highlight [page 11]: The BIOSYNEX® COVID-19 BSS (IgG/IgM) (Biosynex Swiss SA) showed sensitivity of 97.4% and specificity of 100%, demonstrating high analytical performances allowing convenient management of suspected on-going and past-infections.*

*Note [page 11]: L 119: Have these results been peer reviewed and published elsewhere? If so please provide reference? Why not publish the this study and the performance characteristics of the test in the same paper? They ideally need to be assessed together.*

**Our answer:** While the purpose of our study was not to assess the virological analytical performances of the BIOSYNEX® COVID-19 BSS (IgG/IgM) (Biosynex Swiss SA), this rapid diagnostic test has been fully recommended for both SARS-CoV-2-specific IgG and IgM detection by the French Ministry of Health (<https://covid-19.sante.gouv.fr/tests>. ; last access 25 August 2020), following an official report from the National Reference Center for Respiratory Viruses [Centre National de Référence Virus des infection respiratoires (dont la grippe)], Institut Pasteur, Paris. We have added this information in the text.

*Highlight [page 11]: The online instruction in the video for use was available online from Youtube [24].*

*Note [page 11]: When the QR code on Figure 1 is scanned it says the video has been taken down. Please provide the video or QR code. Ideally the video could be permanently attached to this paper by the journal rather than relying on a Youtube video that could be taken down again.*

*Note [page 12]: 132 See latter suggestions about moving full instructions to supplementary materials and using just top half of interpretation panel as Fig 1. Legend needs to state that this was the exact instructions provided to the subjects in this study in both legends.*

**Our answer:** In order to acknowledge the comments raised by Reviewer # 1, we have moved the full instruction for use to supplementary materials. Furthermore, we have provided the video instruction as its supporting information file.

*Note [page 12]: L 134: simplify this phrase*

*Highlight [page 12]: of the Exacto® COVID-19 self-test (Biosynex Swiss SA) is a cross-sectional study performed between April and May 2020 by home-based recruitment of adult volunteers using a door-to- door community approach, in 15 neighborhoods of Strasbourg and its suburbs,...*

**Our answer:** We have simplified this sentence as suggested.

*Note [page 12]: How were these neighborhoods selected? Was there a wide range of socio-economic and educational status and was this representative of developed countries in Northern Europe? Will need a discussion on how generalizable are these results likely to be.*

**Our answer:** Due to the limited movement during the lockdown period, the choice of these neighborhoods and its suburbs was based on their easy accessibility and their high prevalence of reported cases of SARS-CoV-2 infection. We have added this sentence in the "Study design and recruitment of participants" section for more highlighting.

*Note [page 14]: L189: Change appeal for to provide*

*Highlight [page 14]: The observer was responsible for recording the respect or not of each step, appeal for verbal assistance (mimicking telephone support), difficulty, and errors on a standardized sheet.*

**Our answer:** We have changed the words as suggested.

*Note [page 14]: L196: change proposed to provided*

*Highlight [page 14]: In a private setting supervised by an observer, eight standardized test results including four positive tests (one weak positive for IgM, one clearly positive for IgM, one clearly positive for IgG but weak positive for IgM, and one clearly positive for IgM and IgG), two negative tests, and two invalid tests were proposed to the participants for interpretation after successive...*

**Our answer:** We have changed the words as suggested.

*Note [page 14]: L196: delete successive*

*Note [page 14]: L201- 202: suggest change No to #*

*Highlight [page 14]: Panel of 8 Exacto® COVID-19 self-test (Biosynex Swiss SA) cassettes, including 4 positive tests (n°2, n°3, n°6 and n°7), 2 negative tests (n°2 and n°7) and 2 invalid tests (n°1 and n°5).*

**Our answer:** We have changed the words as suggested.

*Note [page 14]: L202: change successively to randomly*

*Highlight [page 14]: Each volunteer successively drew 4 tests among a panel of 8 and interpreted them with the help of the reading and interpretation scale.*

**Our answer:** We have changed the words as suggested.

*Note [page 15]: L228: change and to or*

*Highlight [page 15]: excluded because they were trained (n=12), less than 18 years old (n=5), and not consenting (n=10).*

**Our answer:** We have changed the words as suggested.

*Note [page 18]: L277: delete HIV*

*Highlight [page 18]: Overall, the mean time of HIV self-test performance (since the opening of the box until the migration step) was...*

**Our answer:** It was a mistake, we have deleted it.

*Note [page 19]: L293: delete successive- not clear what this means*

*Highlight [page 19]: COVID-19 self-test results after successive random selection of four tests from a panel of eight standardized tests.*

**Our answer:** We have deleted it.

*Note [page 20]: L308: would be interesting to know if there were any differences in the results from substudy 4 for those previously in subsidy 2 versus 3.*

*Highlight [page 20]: Substudy 4.*

**Our answer:** We did not assess such comparisons.

*Note [page 22]: L349 Europeans of high educational attainment*

*Highlight [page 22]: Finally, our observations lay the foundations for the potential large-scale use of COVID-19 self-test in lay adults, at least Europeans, to complete the arsenal of available serological tests used to assess the immune status vis-a-vis SARS-CoV-2.*

**Our answer:** We thank the reviewer for this clarification, which we have added to the text.

*Note [page 23]: L 376: ..error, however numbers in this group were small.*

*Highlight [page 23]: In the present series, all participants using the video instructions did not need any help and used the pipette without any difficulty or error.*

**Our answer:** We have added this precision related to the small sample size in this discussion as follows: "Although a small sample size of participants used the video instructions in this series, all of them did not need any help and used the pipette without any difficulty or error."

*Note [page 24]: L379: Change delicate to critical*

*Highlight [page 24]: considered as a delicate step in self-testing [34].*

**Our answer:** We have changed the words as suggested.

*Note [page 24]: L395 to 396: Is this really established for SARS-CoV-2 infection. Please provide references*

*Highlight [page 24]: Furthermore, the presence of IgM alone or with IgG means that the contact with the virus was relatively recent.*

**Our answer:** To acknowledge the reviewer's remarks, we completed as follows: "Furthermore, according to the kinetic profile of the systemic humoral response against SARS-CoV-2 and the lifespan of circulating immunoglobulins, the presence of IgM alone or with IgG means that the contact with the virus was relatively recent [37]".

*Note [page 24]: L401: Change neuropsychiatric disorders to psychological distress and not psychologically prepared to who has not received pre-test counseling.*

*Highlight [page 24]: This misinterpretation of positive test results can provide unfortunate*

*consequences such as self-medication or neuro-psychiatric disorders of variable intensity, especially in a person not psychologically prepared [38].*

**Our answer:** We have changed the sentence as suggested.

*Note [page 25]: L419: limit the study's power to detect....what?*

*Highlight [page 25]: Furthermore, the low sample size could reduce the study's power.*

**Our answer:** The low sample size could reduce the study's power to detect a relative difference between groups with high precision.

*Note [page 25]: L425: novel rather than original*

*Highlight [page 25]: During the COVID-19 epidemic, original approaches using individual involvement were proposed in addition to the collective public health approach, and both strategies were furthermore sometimes combined.*

**Our answer:** We have changed the words as suggested.

*Note [page 26]: L439: suggest delete ‘, but this....study’*

*Highlight [page 26]: It seems obvious that the motivations for carrying out a COVID-19 self-test would be clearly different than those which push to carry out an HIV self-test, but this problematic exceeds the aim of our study.*

**Our answer:** We have deleted the sentence as suggested.

*Note [page 26]: L442: change has made too had*

*Highlight [page 26]: The COVID-19 self-test allows an individual to test himself simply and quickly, without visiting a care structure, with the essential aim of knowing if the person is in the course of infection (presence of specific IgM alone) or has made a past infection (...)*

**Our answer:** We have changed the words as suggested.

*Note [page 26]: L443: Need to emphasize that it is not yet known if antibodies are protective and if so how durable this protection is and if antibodies guarantee they cannot infect others. Must emphasize the importance of conveying this to the subjects self-testing and of their need to continue to take precautions to protect themselves and others.*

*Highlight [page 26]: Thus, COVID-19 self-testing for serological screening could be proposed to identify exposed patients that are presumptively immune to SARS -CoV- 2 secondary to ongoing or past-infection and to quantify the prevalence of exposure within a population for epi...*

**Our answer:** To acknowledge these reviewer's remarks, we have added the following sentence: "However, it should be emphasized that the level of protection of seropositivity for SARS-CoV-2 as well as its duration are not known, and even that the presence of specific antibodies does not mean that the person is not contagious, particularly in onset of infection. It will therefore be important to pass this information on to subjects who self-test so that they continue to take precautions to protect themselves and others."

*Note [page 26]: L448: "refer.." change to seek confirmatory antibody test by a clinical laboratory and clinical follow-up" Need to comment on the burden this will place on the health care system.*

*Highlight [page 26]: The instructions for use clearly explains that the lack of reactivity does not*



*eliminate a SARS-CoV-2 infection in progress, and that in the presence of any IgG or IgM reactivities the patient must refer to a health care structure for clinical...*

**Our answer:** We have changed the sentence as suggested, and added that “which could contribute to accentuating tensions in the healthcare system, in particular during epidemic periods”.

*Note [page 26]: L449: change to It should be emphasized that it is not known if a positive antibody test represents protection and the concept of an “immunological passport” cannot be supported at this time.*

*Highlight [page 26]: In any case, the presence of reactivities could constitute an "immunological passport" of protection [46,47], because it is not known if anti-SARS-CoV-2 antibodies are protective at this time, although the general assumption is that the presence of antibod...*

**Our answer:** We have deleted the ambiguous sentence: “.....because it is not known if anti-SARS-CoV-2 antibodies are protective at this time.....”.

*Note [page 27]: L454 Change most excitement to interest*

*Highlight [page 27]: “presumptive immunity” will be determined and used do not exist, this potential use has probably generated the most excitement in the lay public [47].*

**Our answer:** We have changed the words as suggested.

*Note [page 27]: L456-457: delete: ...and would...individuals” No evidence to support his statement.*

*Highlight [page 27]: In any case, an IgG positive COVID-19 self-test result may indicate recovery of a previous SARS-CoV-2 infection, even asymptomatic or mild, and would allow to take more moderate precautions and also to comfortably interact with other COVID-19-seropositive individuals.*

**Our answer:** We have deleted it as suggested.

*Note [page 27]: L459: delete would be hugely beneficial to public health. The is conjecture. Suggest ‘is worthy of further study’*

*Highlight [page 27]: Interestingly, serological home testing could be associated with at-home saliva or swab self-sampling for further SARS- CoV-2 molecular diagnosis, and the widespread use of both home approaches would be hugely beneficial to public health.*

**Our answer:** We have corrected the sentence as suggested.

*Note [page 27]: L461: should consider themselves potentially infected and self-isolate until the results of clinical testing for the virus is known.*

*Highlight [page 27]: Those whom the viral test indicates an active SARS-CoV-2 infection (including silent carriers and patients with early or mild symptoms) will be able to take informed actions, such as self-isolation.*

**Our answer:** We agree with the reviewer. We have changed “patients” by “individuals”.

*Note [page 27]: L465: Change ‘would allow’ to ‘may facilitate’. All of this discussion is too much conjecture and should be toned down.*

*Highlight [page 27]: Importantly, a confirmed population of “recovered” individuals would allow many to return to work, lead to partial lifting of “stay*

**Our answer:** We have corrected the sentence as suggested.

*Note [page 27]: L451: change will to may and indicate how this could be study to support such policies. Discuss how cost-effectiveness would have to be studies.*

*Highlight [page 27]: Removing financial barriers to self-testing by making publicly-funded tests available free to the entire population will help maximize rapid implementation and help COVID-19-affected country to recover and get back to work.*

**Our answer:** We have deleted this ambiguous sentence.

*Note [page 27]: L476: change the general public to 'by at least some groups with high levels of education.*

*Highlight [page 27]: Our features demonstrate that COVID-19 self-testing for serological immune status assessment is highly feasible with potential for use by the general public.*

**Our answer:** We have changed the sentence as suggested.

*Note [page 27]: L477: change will to may*

*Highlight [page 27]: If deployed wisely, it will be complementary to other serological screening tools and*

**Our answer:** We have changed the word as suggested.

*Note [page 28]: L478: change 'offer an immediate and easy solution for' to facilitate uptake of SARS-CoV-2 serology and delete rest of sentence.*

*Highlight [page 28]: could offer an immediate and easy solution for SARS-CoV-2 serology, especially during recovery or de-confinement periods.*

**Our answer:** We have changed the sentence as suggested.

*Note [page 33]: Figure 1. Impractical to include the entire instruction in the main body of the paper. It should be moved to supplementary materials. The top half of the interpretation panel with an appropriate legend would be more appropriate. Given this is the peer reviewed study examining the issue of interpretation the comment under performance about the 98.5% correct interpretation should be removed. Also the reference to support the performance characteristics of the test shown above that statement needs to be provided.*

*Highlight [page 34]: Click here to access/download;Figure;Fig...  
None of these links worked on this version.*

**Our answer:** As answered above, we have moved the full instruction for use to supplementary materials. And we have provided the video instruction as its supporting information file. However, we have added a Section A to the former Figure 3 (considered as a Section B) to present the interpretation of the results. Thus, this new figure is entitled Fig 2 in the revised version of our manuscript with legend written as follows: "**Fig 2. Interpretation of self-test results. A.** The self-test result was interpreted as negative when a Control line (C) was present and readable and the "IgG" and "IgM" lines were absent. It was positive when a "C" and "IgM" (clearly or poorly readable) (case 1), or "C" and "IgG", or "C", "IgM" (clearly or poorly readable), and "IgG" lines were present. Finally, it was invalid when the "C" line was absent regardless of the presence or absence of the "IgG" and/or "IgM" line. **B.** Panel of 8 Exacto® COVID-19 self-test (Biosynex Swiss SA) cassettes, including 4 positive tests (#2, #3, #6 and #7), 2 negative tests (#4 and #8) and 2 invalid tests (#1 and #5). The #2 and #37 are weakly positive for IgM. Each volunteer randomly drew 4 tests among a panel of 8 and interpreted them with the help

of the reading and interpretation scale. The observer noted the number of the drawn test and the result given by the participant”.

Concerning the interpretation of results, since the expected results were known from the code numbers of the eight standardized tests, the correct interpretation of the tests was defined by the percent agreement between the tests results read and interpret by the participants compared to the expected results coded by the numbers and verified by observers. Thus, misinterpretation corresponded to the percent disagreement between the test results read and interpret by the participants and the expected results coded by the numbers. We have added these clarifications in the abstract and the body of the text.

Finally, the virological analytical performances characteristic of the evaluated self-test are provided in the Material and methods section, in the Prototype SARS-CoV-2 test for self-testing.

### **Answer to reviewer #2**

*The authors report on the practicability of a prototype capillary whole-blood IgG-IgM COVID-19 self-test (Exacto COVID-19 self test, Biosynex Swiss, SA, Freiburg, Switzerland) as a serological screening tool for SARS-COV-2 infection adapted to the general public. They performed their evaluation of this test using a cross sectional, general adult population study between April and May 2020 in Strasbourg, France. The study design consisted of face-to-face, paper-based, semi-structured, and self administrated questionnaires. The study enrolled 167 participants of which 82% had a post-graduate level of education. The study evaluated the participants ability to use the test in a number of different testing settings. The authors conclude that 100% of the participants found that performing the self test was easy and 98% found that the interpretation of the self-test results are easy.*

**Our answer:** We thank the reviewer for this perfect summary of our study.

*While this study is very interesting and brings forward an important POC / self- administered SARS-COV-2 serological assay the authors failed to bench mark the antibody status to a gold standard lab based assay. The absence of this weakens their initial pilot findings. Does it bring value if people can follow directions and get a result if the test does not corelate highly to what would be considered a typical bench mark to an assay performed in the laboratory under a clinical standard? The absence of comparative data is a major flaw in the study design.*

**Our answer:** We thank the reviewer for this pertinent remark. However, the objective of this survey was to assess the ability of lay persons to perform or interpret a serological test for SARS-CoV-2 immunochromatography. It was not intended to conduct a self-test performance study as such a study would require a large enough sample size of positive individuals to properly estimate the sensitivity of the self-test. Although this survey was carried out during the epidemic period in France, it should be noted that at that time, only confirmatory molecular testing using RT-PCR was recommended for suspect cases according to the recommendations of the French government to avoid wastage of reagents. Reference serological testing for IgG antibodies to SARS-CoV-2 was only progressively implemented in France during the study period, to be only available at the end of May, after the beginning of the deconfinement. While the purpose of our study was not to assess the virological analytical performances of the BIOSYNEX® COVID-19 BSS (IgG/IgM) (Biosynex Swiss SA), this rapid diagnostic test has been fully recommended for both SARS-CoV-2-specific IgG and IgM detection by the French Ministry of Health (<https://covid-19.sante.gouv.fr/tests> ; last access 25 August 2020), following an official report from the National Reference Center for Respiratory Viruses [Centre National de Référence Virus des infection respiratoires (dont la grippe)], Institut Pasteur, Paris. We have added this information in the text.

Furthermore, in order to comply with the requirements of the ethical committee, all persons with a positive serological result were referred to the laboratory for diagnostic confirmation and to the hospital for management. In this study, 11 (13.3%) people had a positive result with the self-test and they were oriented to laboratory for result confirmation. We

have added these details in the “substudy 2” sections of Methods and results in the revised manuscript.
